# Supplementary material for: Influence of GST- and P450-based metabolic resistance to pyrethroids on blood feeding in the major African malaria vector Anopheles funestus
Source: PubMed Central journal article supplement (PMC7500606; doi:10.1371/journal.pone.0230984), 2020-09-18

# PLOS ONE

## Influence of GST- and P450-based metabolic resistance to pyrethroids on blood feeding in the major African malaria vector *Anopheles funestus* --Manuscript Draft--

|                                                                                      |                                                                                                                                                                                                                                                                                                                                                                                                                                                                                                                                                                                                                                                                                                                                                                                                                                                                                                                                                                                                                                                                                                                                                                                                                                                                                                                                                                                                                                                                                                                                                                                                                                                                                                                                                 |
|--------------------------------------------------------------------------------------|-------------------------------------------------------------------------------------------------------------------------------------------------------------------------------------------------------------------------------------------------------------------------------------------------------------------------------------------------------------------------------------------------------------------------------------------------------------------------------------------------------------------------------------------------------------------------------------------------------------------------------------------------------------------------------------------------------------------------------------------------------------------------------------------------------------------------------------------------------------------------------------------------------------------------------------------------------------------------------------------------------------------------------------------------------------------------------------------------------------------------------------------------------------------------------------------------------------------------------------------------------------------------------------------------------------------------------------------------------------------------------------------------------------------------------------------------------------------------------------------------------------------------------------------------------------------------------------------------------------------------------------------------------------------------------------------------------------------------------------------------|
| <b>Manuscript Number:</b>                                                            | PONE-D-20-07208                                                                                                                                                                                                                                                                                                                                                                                                                                                                                                                                                                                                                                                                                                                                                                                                                                                                                                                                                                                                                                                                                                                                                                                                                                                                                                                                                                                                                                                                                                                                                                                                                                                                                                                                 |
| <b>Article Type:</b>                                                                 | Research Article                                                                                                                                                                                                                                                                                                                                                                                                                                                                                                                                                                                                                                                                                                                                                                                                                                                                                                                                                                                                                                                                                                                                                                                                                                                                                                                                                                                                                                                                                                                                                                                                                                                                                                                                |
| <b>Full Title:</b>                                                                   | Influence of GST- and P450-based metabolic resistance to pyrethroids on blood feeding in the major African malaria vector <i>Anopheles funestus</i>                                                                                                                                                                                                                                                                                                                                                                                                                                                                                                                                                                                                                                                                                                                                                                                                                                                                                                                                                                                                                                                                                                                                                                                                                                                                                                                                                                                                                                                                                                                                                                                             |
| <b>Short Title:</b>                                                                  | Bloodfeeding process and insecticide resistance in <i>Anopheles funestus</i> mosquito                                                                                                                                                                                                                                                                                                                                                                                                                                                                                                                                                                                                                                                                                                                                                                                                                                                                                                                                                                                                                                                                                                                                                                                                                                                                                                                                                                                                                                                                                                                                                                                                                                                           |
| <b>Corresponding Author:</b>                                                         | Lynda DJOUNKWA NOUAGE, Msc<br>Centre for research in Infectious diseases (CRID)<br>Yaounde, CAMEROON                                                                                                                                                                                                                                                                                                                                                                                                                                                                                                                                                                                                                                                                                                                                                                                                                                                                                                                                                                                                                                                                                                                                                                                                                                                                                                                                                                                                                                                                                                                                                                                                                                            |
| <b>Keywords:</b>                                                                     | Malaria, Mosquito, <i>Anopheles funestus</i> , Insecticide resistance, Metabolic resistance, GST, P450, Blood meal intake                                                                                                                                                                                                                                                                                                                                                                                                                                                                                                                                                                                                                                                                                                                                                                                                                                                                                                                                                                                                                                                                                                                                                                                                                                                                                                                                                                                                                                                                                                                                                                                                                       |
| <b>Abstract:</b>                                                                     | <p>Insecticide resistance genes are often associated with pleiotropic effects on various mosquito life-history traits. However, very little information is available on the impact of insecticide resistance on blood feeding process in mosquitoes. Here, using two recently detected DNA-based metabolic markers in the major malaria vector, <i>An. funestus</i>, we investigated how metabolic resistance genes could affect blood meal intake.</p> <p>After allowing both the field F1 and lab F8 <i>Anopheles funestus</i> strains to feed on the human arm for 30 minutes, we assessed the association between key parameters of blood meal process including, probing time, feeding duration, blood feeding success, blood meal size, and markers of glutathione S-transferase (L119F-GSTe2) and cytochrome P450 (CYP6P9a_R) - mediated metabolic resistance. None of the parameters of blood meal process was associated with L119F-GSTe2 genotypes. In contrast, for CYP6P9a_R, homozygote resistant mosquitoes were significantly more able to blood-feed than homozygote susceptible (OR = 3.3; CI 95%: 1.4-7.7; P =0.01) mosquitoes. Moreover, the volume of blood meal ingested by CYP6P9a-SS mosquitoes was lower than that of CYP6P9a-RS (P&lt;0.004) and of CYP6P9a-RR (P&lt;0.006). This suggests that CYP6P9a gene affects the feeding success and blood meal size of <i>An. funestus</i>. However, no correlation was found in the expression of CYP6P9a and that of genes encoding for salivary proteins involved in blood meal process.</p> <p>This study suggests that P450-based metabolic resistance may increase the blood feeding ability of malaria vectors and potentially impacting their vectorial capacity.</p> |
| <b>Order of Authors:</b>                                                             | <p>Lynda NOUAGE, Msc</p> <p>Emmanuel ELANGA-NDILLE</p> <p>Achille Binyang</p> <p>Magellan Tchouakui</p> <p>Tatiane ATSATSE</p> <p>Cyrille Ndo</p> <p>Sévilor KEKEUNOU</p> <p>Charles S. Wondji</p>                                                                                                                                                                                                                                                                                                                                                                                                                                                                                                                                                                                                                                                                                                                                                                                                                                                                                                                                                                                                                                                                                                                                                                                                                                                                                                                                                                                                                                                                                                                                              |
| <b>Additional Information:</b>                                                       |                                                                                                                                                                                                                                                                                                                                                                                                                                                                                                                                                                                                                                                                                                                                                                                                                                                                                                                                                                                                                                                                                                                                                                                                                                                                                                                                                                                                                                                                                                                                                                                                                                                                                                                                                 |
| <b>Question</b>                                                                      | <b>Response</b>                                                                                                                                                                                                                                                                                                                                                                                                                                                                                                                                                                                                                                                                                                                                                                                                                                                                                                                                                                                                                                                                                                                                                                                                                                                                                                                                                                                                                                                                                                                                                                                                                                                                                                                                 |
| <b>Financial Disclosure</b>                                                          | The funders had no role in study design, data collection and analysis, decision to publish, or preparation of the manuscript                                                                                                                                                                                                                                                                                                                                                                                                                                                                                                                                                                                                                                                                                                                                                                                                                                                                                                                                                                                                                                                                                                                                                                                                                                                                                                                                                                                                                                                                                                                                                                                                                    |
| Enter a financial disclosure statement that describes the sources of funding for the |                                                                                                                                                                                                                                                                                                                                                                                                                                                                                                                                                                                                                                                                                                                                                                                                                                                                                                                                                                                                                                                                                                                                                                                                                                                                                                                                                                                                                                                                                                                                                                                                                                                                                                                                                 |

work included in this submission. Review the [submission guidelines](#) for detailed requirements. View published research articles from [PLOS ONE](#) for specific examples.

This statement is required for submission and **will appear in the published article** if the submission is accepted. Please make sure it is accurate.

#### Unfunded studies

Enter: *The author(s) received no specific funding for this work.*

#### Funded studies

Enter a statement with the following details:

- Initials of the authors who received each award
- Grant numbers awarded to each author
- The full name of each funder
- URL of each funder website
- Did the sponsors or funders play any role in the study design, data collection and analysis, decision to publish, or preparation of the manuscript?
- **NO** - Include this sentence at the end of your statement: *The funders had no role in study design, data collection and analysis, decision to publish, or preparation of the manuscript.*
- **YES** - Specify the role(s) played.

\* typeset

#### Competing Interests

Use the instructions below to enter a competing interest statement for this submission. On behalf of all authors, disclose any [competing interests](#) that could be perceived to bias this work—acknowledging all financial support and any other relevant financial or non-financial competing interests.

This statement **will appear in the published article** if the submission is accepted. Please make sure it is accurate. View published research articles from [PLOS ONE](#) for specific examples.

The authors have declared that no competing interests exist.

**NO authors have competing interests**

Enter: *The authors have declared that no competing interests exist.*

**Authors with competing interests**

Enter competing interest details beginning with this statement:

*I have read the journal's policy and the authors of this manuscript have the following competing interests: [insert competing interests here]*

\* typeset

**Ethics Statement**

NA

Enter an ethics statement for this submission. This statement is required if the study involved:

- Human participants
- Human specimens or tissue
- Vertebrate animals or cephalopods
- Vertebrate embryos or tissues
- Field research

Write "N/A" if the submission does not require an ethics statement.

General guidance is provided below. Consult the [submission guidelines](#) for detailed instructions. **Make sure that all information entered here is included in the Methods section of the manuscript.**

**Format for specific study types**

**Human Subject Research (involving human participants and/or tissue)**

- Give the name of the institutional review board or ethics committee that approved the study
- Include the approval number and/or a statement indicating approval of this research
- Indicate the form of consent obtained (written/oral) or the reason that consent was not obtained (e.g. the data were analyzed anonymously)

**Animal Research (involving vertebrate animals, embryos or tissues)**

- Provide the name of the Institutional Animal Care and Use Committee (IACUC) or other relevant ethics board that reviewed the study protocol, and indicate whether they approved this research or granted a formal waiver of ethical approval
- Include an approval number if one was obtained
- If the study involved *non-human primates*, add *additional details* about animal welfare and steps taken to ameliorate suffering
- If anesthesia, euthanasia, or any kind of animal sacrifice is part of the study, include briefly which substances and/or methods were applied

**Field Research**

Include the following details if this study involves the collection of plant, animal, or other materials from a natural setting:

- Field permit number
- Name of the institution or relevant body that granted permission

**Data Availability**

Authors are required to make all data underlying the findings described fully available, without restriction, and from the time of publication. PLOS allows rare exceptions to address legal and ethical concerns. See the [PLOS Data Policy](#) and [FAQ](#) for detailed information.

Yes - all data are fully available without restriction

A Data Availability Statement describing where the data can be found is required at submission. Your answers to this question constitute the Data Availability Statement and **will be published in the article**, if accepted.

**Important:** Stating 'data available on request from the author' is not sufficient. If your data are only available upon request, select 'No' for the first question and explain your exceptional situation in the text box.

Do the authors confirm that all data underlying the findings described in their manuscript are fully available without restriction?

**Describe where the data may be found in full sentences. If you are copying our sample text, replace any instances of XXX with the appropriate details.**

- If the data are **held or will be held in a public repository**, include URLs, accession numbers or DOIs. If this information will only be available after acceptance, indicate this by ticking the box below. For example: *All XXX files are available from the XXX database (accession number(s) XXX, XXX).*
- If the data are all contained **within the manuscript and/or Supporting Information files**, enter the following: *All relevant data are within the manuscript and its Supporting Information files.*
- If neither of these applies but you are able to provide **details of access elsewhere**, with or without limitations, please do so. For example:

*Data cannot be shared publicly because of [XXX]. Data are available from the XXX Institutional Data Access / Ethics Committee (contact via XXX) for researchers who meet the criteria for access to confidential data.*

*The data underlying the results presented in the study are available from (include the name of the third party*

All relevant data are within the manuscript and its Supporting Information files

*and contact information or URL).*

- This text is appropriate if the data are owned by a third party and authors do not have permission to share the data.

\* typeset

Additional data availability information:

1 **Influence of GST- and P450-based metabolic resistance to**  
2 **pyrethroids on blood feeding in the major African malaria vector**  
3 ***Anopheles funestus***

4

5 Lynda NOUAGE<sup>1,2</sup>✚\*, Emmanuel ELANGA-NDILLE<sup>1</sup>✚\*, Achille BINYANG<sup>1,2</sup>, Magellan  
6 TCHOUAKUI<sup>1,2</sup>, Tatiane ATSATSE<sup>1,2</sup>, Cyrille NDO<sup>3, 4</sup>, Sévilor KEKEUNOU<sup>2</sup>, Charles S.  
7 WONDJI<sup>1,5</sup>

8

9 <sup>1</sup>Departement of Medical Entomology, Centre for Research in Infectious Diseases (CRID) P.O.  
10 BOX 13591, Yaoundé, Cameroon

11 <sup>2</sup>Department of Animal Biology and Physiology, Faculty of Science, University of Yaoundé 1,  
12 P.O. Box 812, Yaoundé, Cameroon

13 <sup>3</sup>Departement of Parasitology and Microbiology, Centre for Research in Infectious Diseases  
14 (CRID) P.O. BOX 13591, Yaoundé, Cameroon

15 <sup>4</sup>Department of Biological Sciences, Faculty of Medicine and Pharmaceutical Sciences,  
16 University of Douala, P.O. Box 24157, Douala, Cameroon.

17 <sup>5</sup>Department of Vector Biology, Liverpool School of Tropical Medicine, Pembroke Place,  
18 Liverpool L3 5QA, UK

19

20 ✚: These authors contributed equally to this work

21 \*: Corresponding authors: Emmanuel ELANGA-NDILLE ([emmsdille@yahoo.fr](mailto:emmsdille@yahoo.fr);  
22 [emmanuel.elanga@crid-cam.net](mailto:emmanuel.elanga@crid-cam.net)) and Lynda NOUAGE ([lnouage@gmail.com](mailto:lnouage@gmail.com))

23

24

25

26

27 **Abstract**

28 Insecticide resistance genes are often associated with pleiotropic effects on various mosquito  
29 life-history traits. However, very little information is available on the impact of insecticide  
30 resistance on blood feeding process in mosquitoes. Here, using two recently detected DNA-  
31 based metabolic markers in the major malaria vector, *An. funestus*, we investigated how  
32 metabolic resistance genes could affect blood meal intake.

33 After allowing both the field F1 and lab F8 *Anopheles funestus* strains to feed on the human  
34 arm for 30 minutes, we assessed the association between key parameters of blood meal process  
35 including, probing time, feeding duration, blood feeding success, blood meal size, and markers  
36 of glutathione S-transferase (*L119F-GSTe2*) and cytochrome P450 (*CYP6P9a\_R*) - mediated  
37 metabolic resistance. None of the parameters of blood meal process was associated with *L119F-*  
38 *GSTe2* genotypes. In contrast, for *CYP6P9a\_R*, homozygote resistant mosquitoes were  
39 significantly more able to blood-feed than homozygote susceptible (OR = 3.3; CI 95%: 1.4-7.7;  
40 P =0.01) mosquitoes. Moreover, the volume of blood meal ingested by *CYP6P9a*-SS  
41 mosquitoes was lower than that of *CYP6P9a*-RS (P<0.004) and of *CYP6P9a*-RR (P<0.006).  
42 This suggests that *CYP6P9a* gene affects the feeding success and blood meal size of *An.*  
43 *funestus*. However, no correlation was found in the expression of *CYP6P9a* and that of genes  
44 encoding for salivary proteins involved in blood meal process.

45 This study suggests that P450-based metabolic resistance may increase the blood feeding ability  
46 of malaria vectors and potentially impacting their vectorial capacity.

47 **Keywords:** Malaria, Mosquito, *Anopheles funestus*, Insecticide resistance, Metabolic  
48 resistance, GST, P450, Blood meal intake

49

50



## 51 **Introduction**

52 Malaria remains a major public health scourge in sub-Saharan Africa despite significant progress  
53 made since the 2000s in reducing its burden [1]. This disease is caused by a Plasmodium  
54 parasite transmitted by *Anopheles* mosquito species while taking a blood meal from humans.  
55 Blood feeding is essential for female mosquito's fecundity [2]. All *Anopheles* species like all  
56 anautogenous female mosquitoes, require a blood meal to obtain amino acids needed to  
57 synthesize yolk proteins for eggs maturation [3,4].

58 Mosquito's blood feeding success is facilitated by the pharmacological properties of salivary  
59 gland proteins [5]. Indeed, some salivary proteins such as anopheline antiplatelet protein  
60 (AAPP), apyrase, gSG6 and members of D7 family have been identified as vasodilators, anti-  
61 coagulants and inhibitors of platelet aggregation allowing mosquitoes to overcome host  
62 haemostatic mechanisms and to have a successful blood meal [5-8].

63 Mosquito's fecundity was shown to vary by source and size of the blood meal with a difference  
64 of these two parameters resulting in significant variations of the number of eggs laid by each  
65 female mosquito [4,8]. It has been shown that the number of eggs laid per female is positively  
66 associated to the amount of blood ingested as larger blood meals resulted in an increase of the  
67 number of females that developed eggs and the number of eggs per female [9,10]. The volume  
68 of blood taken by a mosquito could be affected by a range of intrinsic (host immunity) and  
69 extrinsic factors including ambient temperatures, mosquito age, parity status, gonotrophic  
70 cycle, blood feeding history and infection status [10]. More recently, it was reported that  
71 exposure to pyrethroids could also significantly influence the blood meal process and the blood  
72 meal volume ingested by *Anopheles gambiae* mosquito [11].

73 Pyrethroids (PY) are the insecticide class mostly used in the last two decades through ITNs and  
74 IRS strategies to control malaria transmission [12]. Unfortunately, the widespread use of these  
75 insecticides has favoured the development of resistance in malaria vector species [13,14].

76 Resistance to pyrethroids involves two main mechanisms: (i) metabolic resistance, due to the  
77 increase expression level of detoxifying enzymes, belonging to three families: the cytochrome  
78 P450 monooxygenases, the glutathione S-transferases and the carboxylesterases; and (ii) target-  
79 site resistance due to mutations in the voltage sodium channels known as knock-down (*kdr*)  
80 mutations [15,16]. Although resistance mechanisms help mosquitoes to survive under  
81 continuous insecticide pressure, these actions are costly and may negatively affect mosquito's  
82 fitness including body size, adult longevity, larval development time, fecundity, fertility,  
83 mating competitiveness and blood feeding capability [17-19]. For target-site resistance, a  
84 decreased longevity and an increased larval development time have been reported in *kdr*-  
85 pyrethroid-resistant mosquitoes [20,21]. Moreover, a recent study suggested that *kdr*-based  
86 resistance could impact blood feeding with heterozygote (*kdr*-RS) and susceptible (*kdr*-SS)  
87 mosquitoes taking higher blood volume than homozygote (*kdr*-RR) resistant individuals [11].  
88 In contrast, little is known on the impact of metabolic resistance as DNA-based markers were  
89 not previously available for this mechanism; thereby limiting the ability to investigate its  
90 physiological impact on the blood feeding process in mosquitoes. However, taking advantage  
91 of the identification of the first DNA-based metabolic marker in *An. funestus* mosquito, one  
92 study reported that a GST-based metabolic resistance caused by a leucine to phenylalanine  
93 amino acid change at codon 119 in the glutathione S-transferase epsilon 2 (*L119F-GSTe2*) [22],  
94 has a detrimental impact on *An. funestus* fitness as field mosquitoes exhibited a reduced  
95 fecundity and slower larval development but an increased adult longevity [23]. On the other  
96 hand, a new DNA-based assay was recently designed for cytochrome P450-mediated resistance  
97 (the *CYP6P9a*-R) in *An. funestus*. This marker showed that mosquitoes carrying this P450-  
98 resistant allele survived and succeeded in blood feeding more often than did susceptible  
99 mosquitoes when exposed to insecticide-treated nets [24]. The design of assays for both GST-  
100 and P450-based resistance now offers a great opportunity to explore how the blood feeding

101 process is influenced by metabolic resistance mechanism in malaria vectors and further assess  
102 how resistance may impact the vectorial capacity of mosquitoes to transmit malaria in the  
103 natural environment.

104 Here, we investigated the effect of metabolic resistance to pyrethroids on the blood feeding  
105 process in *An. funestus*, using the two DNA-based metabolic resistance markers: *L119F-GSTe2*  
106 and *CYP6P9a-R* [22,24]. Specifically, we assessed the association between the genotypes of  
107 these metabolic resistance markers and key parameters of blood feeding including mosquito  
108 probing time, feeding duration and the blood meal size.

109

110

## 111 **Material and Methods**

### 112 **Mosquito collection and rearing**

113 Experiments were carried out using both field and lab strains of *An. funestus*. Field mosquitoes  
114 (F<sub>1</sub>) were generated from indoor resting female (F<sub>0</sub>) collected in Mibellon (6°46'N, 11° 70'E),  
115 a village located in a rural area of the savanna-forest region in Cameroon, Central Africa where  
116 the *L119F-GSTe2* has been reported [25]. Blood-fed field collected females were kept in paper  
117 cups and transported to the insectary of the Centre for Research in Infectious Diseases (CRID)  
118 in Yaoundé where they were kept for 4–5 days until they became fully gravid and were then  
119 induced to lay eggs using the forced eggs-laying method [26]. The eggs were placed in paper  
120 cups containing water to hatch, after which the larvae were transferred in to trays and reared to  
121 adults. To assess the effect of *CYP6P9a* marker, F<sub>8</sub> progenies were generated from reciprocal  
122 crosses established between the pyrethroid susceptible laboratory strain (FANG) and the  
123 resistant (FUMOZ-R) lab strain. These two *An. funestus* lab strains were colonized from  
124 mosquitoes collected in Southern Africa region. FUMOZ is a pyrethroid resistant strain

125 established in the insectary from wild-caught *An. funestus* mosquito species from southern  
126 Mozambique [27]. The previous study reported that the over-expression of two duplicated P450  
127 genes, *CYP6P9a* and *CYP6P9b*, constitute the main mechanism driving pyrethroid resistance  
128 in this strain [28,29] for which the *119F-GSTe2* allele is absent [22]. The FANG strain is  
129 completely susceptible to pyrethroids colonized from Calueque in southern Angola [27].

130

### 131 **Blood feeding experiments and blood meal size quantification**

132 **Blood feeding process:** Since blood meal volume has previously been reported to correlate with  
133 mosquito size [2], individuals used for blood feeding experiments were first grouped according  
134 to their size. Mosquito size was determined by weighing (using an analytical micro-scale,  
135 SARTORIUS, Goettingen, Germany ) each individual (adult females aged 3-7 days) starved  
136 for 24h and immobilized by chilling them for 2 minutes at 5°C. Each mosquito was then placed  
137 in paper cups for about an hour before given a blood meal. Mosquitoes were allowed to bite for  
138 30 min on the bare forearm of a single human volunteer after informed consent.

139 The duration of probing and blood feeding was assessed using a batch of 120 F<sub>1</sub> female field-  
140 collected mosquitoes. For this purpose, mosquitoes were individually transferred in polystyrene  
141 plastic cups covered with  net. They were allowed to rest for 15 min before observations began.

142 During the blood intake, each mosquito was filmed with a Digital HD Video Camera (Canon  
143 PC2154, Canon INC, Japan) placed beside the plastic cup. At the end of the time allowed for  
144 feeding, the film for each mosquito was analysed and the parameters such as probing time  
145 (defined as the time taken from initial insertion of the mouthparts in the skin until the initial  
146 engorgement of blood) [5] and total feeding duration, were recorded, using a digital timer. Due  
147 to the low density of female mosquitoes obtained at F<sub>8</sub> generation from reciprocal crosses of  
148 the lab strain mosquitoes, experiments to estimate the probing and the feeding duration of this  
149 strain were not investigated. 

150 To determine the blood meal size for both strains, batches of 25 mosquitoes grouped according  
151 to their weight were allowed to bite on a human arm. In this case, neither the probing time nor  
152 the feeding duration was recorded. After the trial, the whole abdomen of successfully fed  
153 mosquitoes (evident by red-coloration engorgement of the abdomen) was extracted and stored  
154 in an individual 1.5 ml microtube at – 20°C to measure the blood meal size. The rest of the  
155 carcasses as well as unfed mosquitoes were kept individually in a microtube containing RNA-  
156 later and stored at -20°C.

### 157 **Blood meal size quantification**

158 The volume of blood ingested by each mosquito was determined by quantifying the  
159 haemoglobin amount, as previously described [30]. Briefly, abdomen of blood fed mosquitoes  
160 were homogenized in 0.5 ml of Drabkin's reagent which converts the haemoglobin into  
161 haemoglobin cyanide (HiCN). After 20 minutes at room temperature and the addition of 0.5 ml  
162 of chloroform solution, samples were centrifuged at 5600 rpm for 5 min. The aqueous  
163 supernatant containing HiCN was transferred in a new 1.5 ml microtube. An aliquot of 200µl  
164 from each sample was transferred to a microplate and the optical density (OD) read at a  
165 wavelength of 620nm in a spectrophotometer (EZ Read 400, biochrom, Cambridge, UK). OD  
166 for each sample were read in duplicate and the average value between the two replicates was  
167 considered as OD value of the sample. In parallel, OD read on various amounts of human  
168 volunteer blood added to Drabkin's reagent in individual microtubes were used as control to  
169 generate calibration curves and the regression line used to assess the relationship between OD  
170 and blood volume. For each sample, the blood meal size was estimated according to the weight  
171 by dividing the blood volume estimated using the regression line by the average weigh of each  
172 batch of mosquitoes constituted after the weighing. The blood meal size was then expressed in  
173 µL of blood per mg of weight.

174

175 **Molecular species identification**

176 Genomic DNA (gDNA) was extracted from both blood-fed and unfed mosquitoes using the  
177 Livak protocol [31]. Instead of using the whole body as done for unfed mosquitoes, DNA was  
178 extracted from the carcasses of fed mosquitoes after removing the abdomen for blood volume  
179 quantification. The concentration and purity of the extracted gDNA were subsequently  
180 determined using a NanoDrop™ spectrophotometer (Thermo Scientific, Wilmington, USA)  
181 before storage at -20 °C. An aliquot of gDNA extracted from field-collected strain w used for  
182 molecular identification by a polymerase chain reaction [32] to determine species composition  
183 of *An. funestus* group among the samples.

184 **Genotyping of *L119F-GSTe2* mutation in field-collected strain**

185 The *L119F-GSTe2* mutation was genotyped using gDNA extracted from carcasses of field-  
186 collected strains following an allele specific PCR diagnostic assay previously described [23].  
187 The primers sequences are given in table S1. PCR was performed in Gene Touch thermalcycler  
188 (Model TC-E-48DA, Hangzhou, 310053, China), in a reaction volume of 15 µl using 10 µM  
189 of each primer, 10X Kapa Taq buffer A, 0.2 mM dNTPs, 1.5 mM MgCl<sub>2</sub>, 1U Kapa Taq (Kapa  
190 Biosystems, Wilmington, MA, USA) and 1µl of genomic DNA as template. The cycle  
191 parameters were: 1 cycle at 95 °C for 2 min; 30 cycles of 94 °C for 30 s, 58 °C for 30 s, 72 °C  
192 for 1 min and then a final extension at 72 °C for 10 min. PCR products were separated on 2%  
193 agarose gel by electrophoresis. The size of the diagnostic band was 523 bp for homozygous  
194 resistant (RR) and 312 bp for homozygous susceptible (SS), while heterozygous (RS) showed  
195 the two bands.

196

197

198

## 199 **Genotyping of *CYP6P9a*-R allele in lab strain mosquitoes**

200 The *CYP6P9a* resistance marker was genotyped using the protocol recently designed by [24].  
201 A PCR-RFLP were carried out using gDNA extracted from the carcasses of F<sub>8</sub> generation  
202 individuals obtained from the reciprocal crosses between FANG and FUMOZ strains used for  
203 blood feeding. Briefly, a partial *CYP6P9a* upstream region was amplified in a final volume of  
204 15µl PCR mixture containing 1.5µl of 10X Kapa Taq buffer A (Kapa Biosystems, Wilmington,  
205 MA, USA), 0.12µl of 5 U/µl KAPA taq, 0.12µl of 25µM dNTP, 0.75µl of 25µM MgCl<sub>2</sub>, 0.51µl  
206 of each primer, 10.49µl of dH<sub>2</sub>O and 1µl of genomic DNA. The PCR cycle parameters were as  
207 followed: the initial denaturation step at 95°C for 5 minutes followed by 35 cycles of 94°C for  
208 30 seconds, 58°C for 30 seconds and 72°C for 45 seconds and a final extension step of 72°C  
209 for 10 minutes. The PCR products were size separated on a 1.5 % agarose gel stained with  
210 Midori Green Advance DNA Stain (Nippon genetics Europe GmbH) and visualised using a gel  
211 imaging system to confirm the product size (450bp). Then, the PCR product was incubated at  
212 65°C for 2 hours. This was done in 0.2ml PCR strip tubes using 5µl of PCR product, 1µl of  
213 cutSmart buffer, 0.2µl of 2 units of Taq<sub>1</sub> enzyme (New England Biolabs) and 3.8µl of dH<sub>2</sub>O.  
214 Size separation was done on a 2.0% agarose gel stained with Midori Green Advance DNA Stain  
215 at 100V for 30 minutes. The gel was visualised using the gel imaging system.

216

## 217 **Gene expression profiling of major salivary genes encoding proteins involved in blood** 218 **meal process.**

219 The expression profiles of a set of salivary genes encoding for proteins involved in blood meal  
220 process was compared between *CYP6P9a*-RR, *CYP6P9a*-RS and *CYP6P9a*-SS *An. funestus*  
221 mosquitoes. For each gene, two pairs of exon-spanning primers was designed for each gene  
222 using Primer3 online software (v4.0.0; <http://bioinfo.ut.ee/primer3/>) and only primers with PCR

223 efficiency between 90 and 110% determined using a cDNA dilution series obtained from a  
224 single sample, were used for qPCR analysis. Taking into account this criteria of efficiency, only  
225 the AAPP and four members of D7 family genes (D7r1, D7r2, D7r3, and D7r4) were used for  
226 this analysis. Primers are listed in Table S1. Total RNA was extracted from three batches of 10  
227 whole females of 3–5 days old from CYP6P9a-RR, CYP6P9a-RS and CYP6P9a-SS  
228 mosquitoes. RNA was isolated using the RNAeasy Mini kit (Qiagen) according to the  
229 manufacturer's instructions. The RNA quantity was assessed using a NanoDrop ND1000  
230 spectrophotometer (Thermo Fisher) and 1µg from each of the three biological replicates for  
231 each batch of mosquitoes was used as a template for cDNA synthesis using the SuperScript III  
232 (Invitrogen, Waltham, Massachusetts, USA ) with oligo-dT20 and RNase H, following the  
233 manufacturer's instructions. The qPCR assays were carried out in a MX 3005 real-time PCR  
234 system (Agilent, Santa Clara, CA 95051, United States) using Brilliant III Ultra-Fast SYBR  
235 Green qPCR Master Mix (Agilent). A total of 10 ng of cDNA from each sample was used as  
236 template in a three-step program involving a denaturation at 95 °C for 3 min followed by 40  
237 cycles of 10 s at 95 °C and 10 s at 60 °C and a last step of 1 min at 95 °C, 30 s at 55 °C, and 30  
238 s at 95 °C. The relative expression and fold-change of each target gene in CYP6P9a-RR and  
239 CYP6P9a-RS relative to CYP6P9a-SS was calculated according to the  $2^{-\Delta\Delta CT}$  method  
240 incorporating PCR efficiency after normalization with the housekeeping RSP7 ribosomal  
241 protein S7 (VectorBase ID: AFUN007153;) and the actin 5C (vectorBase ID: AFUN006819)  
242 genes for *An. funestus*. 

243

#### 244 **Statistical analysis**

245 All analyses were conducted using GraphPad Prism version 7.00 software. We estimated a  
246 Fisher's exact probability test and the odds-ratio of *L119F-GSTe2* and *CYP6P9a* genotypes  
247 (homozygous resistant = RR, heterozygote resistant=RS and homozygous resistant =SS) and



248 both susceptible (S) and resistant (R) alleles. This allowed us to assess the association between:  
249 a) insecticide resistance and mosquito's weight by comparing the proportions of the genotypes  
250 of both genes in each group established after weighing; b) blood feeding success and insecticide  
251 resistance by comparing the proportion of each genotype in both fed and unfed mosquitoes.  
252 After arbitrary regrouping the time into four different intervals with same amplitude, the  
253 duration of probing and feeding was analysed with chi-square test by comparing the proportion  
254 of *L119F-GSTe2* and *CYP6P9a* genotypes in each defined time interval. After estimating the  
255 median of weighted blood meal for each genotype, Kruskal-Wallis and Mann-Whitney tests  
256 were used to compare the differences between more than two groups and between two groups,  
257 respectively.

258

## 259 **Results**

### 260 **Metabolic resistance genes and *An. funestus* mosquito's weight**

261 A total of 1,200 and 273 female mosquitoes were weighted, respectively for field strain (F<sub>1</sub>  
262 generation) and lab strain (F<sub>8</sub> generation). The mean weight of a mosquito was  $0.9 \pm 0.010$  mg  
263 (minimum = 0.2 mg; maximum = 2.3mg) and  $0.89 \pm 0.016$  mg (minimum = 0.2 mg; maximum  
264 = 1.7mg) for field and lab strain respectively. No significant difference was found between the  
265 mean weights of two strains. For all the analyses, we arbitrarily grouped mosquitoes according  
266 to their weight values, into two different classes as followed: [0 - 1.0] mg and [1.1 - 2.3] mg.  
267 Analysis of the distribution of *L119F-GSTe2* mutation genotypes in each class of field strain  
268 mosquitoes showed no association between the mosquito's weight and *L119F-GSTe2*  
269 genotypes ( $\chi^2 = 0.15$ ;  $p = 0.9$ ; OR = 1.2, 95%CI: 0.3742 - 4.176, for RR vs RS; OR=1.1, 95%CI:  
270 0.3659 - 3.606 for RR vs SS; OR = 0.9, 95%CI: 0.4943 - 1.709 for RS vs SS) (Figure 1 and  
271 Table 1). This absence of correlation between the *L119F-GSTe2* genotypes and the weight of

272 mosquitoes was confirmed at the allele level (OR=1; 95% CI: 0.5–2.0;  $p=0.5$ ) showing that  
 273 the L119F mutation may not impact the weight of this *An. funestus* field population (Table 1).  
 274 In contrast, a significant association was observed between *CYP6P9a* genotypes and the weight  
 275 of mosquito ( $\chi^2=29.54$ ,  $p<0.0001$ ). Indeed, proportions of RR and RS genotypes were higher  
 276 than that of SS in the lowest weight class, whereas, for larger weight, mosquitoes with SS  
 277 genotype were more abundant (67.2%). This association is further supported by odds ratio  
 278 estimates showing that proportions of homozygote resistant (RR) (OR=5.4; CI 95%: 2.3-12.7;  
 279  $p<0.0001$ ) and heterozygote (RS) (OR=5.6; CI 95%: 2.8-11.1;  $p<0.0001$ ) mosquitoes are  
 280 significantly higher in lowest weight class than the larger one when compared to homozygote  
 281 susceptible mosquitoes (Table 1). Overall, mosquitoes harbouring the *CYP6P9a*-S susceptible  
 282 allele displayed higher weight compared to those with the *CYP6P9a*-R resistant allele (OR=2.8;  
 283 CI 95%: 1.5–5.0;  $p=0.0003$  (Table 1) suggesting that over-expression of the *CYP6P9a* gene is  
 284 reducing the weight of pyrethroid resistant *An. funestus* mosquitoes.

285 **Table 1:** level of association of *L119F-GSTe2* and *CYP6P9a*-R genotypes with mosquito  
 286 weight by comparing low (0-1.0mg) and high (1-2.4mg) weight samples.

| Genotypes | <i>L119F-GSTe2</i> |                 | <i>CYP6P9a-R</i> |                 |
|-----------|--------------------|-----------------|------------------|-----------------|
|           | Odds ratio         | <i>p</i> -value | Odds ratio       | <i>p</i> -value |
| RR vs SS  | 1.1 (0.4-3.6)      | 0.5             | 5.4 (2.3-12.7)   | < 0.0001        |
| RS vs SS  | 0.9 (0.5-1.7)      | 0.4             | 5.6 (2.8-11.1)   | < 0.0001        |
| RR vs RS  | 1.2 (0.4-4.1)      | 0.5             | 1.0 (0.5-2.3)    | 0.5             |
| S vs R    | 1 (0.5-2.0)        | 0.5             | 2.8 (1.5-5.0)    | 0.0003          |

287 SS: homozygote susceptible; RR: homozygote resistant; RS: heterozygote; \* significant difference  $p < 0.05$ .

288

289

290

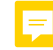

291 **Impact of *L119F-GSTe2* and *CYP6P9a* mutations on *An. funestus* blood feeding success**

292 ***L119F-GSTe2***: out of the 1,200 individuals from field strain mosquitoes that were allowed to  
 293 take a blood meal, 457 (39.6%) successfully fed whereas 743 did not. Among blood-fed  
 294 mosquitoes, a total of 360 were successfully genotyped and 7% (24/360) were homozygote  
 295 resistant (RR), 28% (103/360) were heterozygotes resistant (RS) and 65% (233/360) were  
 296 homozygotes susceptible (SS) (Figure 2a). On the other hand, out of the 300 unfed mosquitoes  
 297 randomly selected for genotyping, 5% (15/300), 32% (62/300) and 63% (189/300), were  
 298 homozygote resistant, heterozygotes and homozygote susceptible, respectively (Figure 2a).  
 299 However, the distribution of L119F genotypes was not statistically different between blood-fed  
 300 and unfed mosquitoes ( $\chi^2=0.63, p=0.7$ ). Furthermore, estimation of odds ratio. (OR=1; CI 95%:  
 301 0.5–2.0;  $p = 0.6$ ) showed overall that mosquitoes bearing the 119F-R resistant allele have the  
 302 same chance to have a successful blood feeding than those with the 119F-S susceptible alleles  
 303 (Table 2). This suggests that the ability to take blood is not impacted by the *L119F-GSTe2*  
 304 mutation in *An. funestus*.

305 **Table 2:** Assessment of the association of *L119F-GSTe2* and *CYP6P9a-R* mutations with *An.*  
 306 *funestus* mosquito blood feeding

| Genotypes | <i>L119F-GSTe2</i> |                 | <i>CYP6P9a-R</i> |                 |
|-----------|--------------------|-----------------|------------------|-----------------|
|           | Odds ratio         | <i>p</i> -value | Odds ratio       | <i>p</i> -value |
| RR vs SS  | 0.7 (0.2-2.4)      | 0.4             | 3.3 (1.4-7.7)    | 0.01            |
| RS vs SS  | 1.1 (0.62-2.1)     | 0.4             | 1.7 (0.9-3.1)    | 0.1             |
| RR vs RS  | 0.6 (0.2-2.3)      | 0.3             | 1.9 (0.9-4.4)    | 0.1             |
| R vs S    | 1 (0.5-2.0)        | 0.6             | 1.8 (1.1-3.2)    | 0.04            |

307 SS: homozygote susceptible; RR: homozygote resistant; RS: heterozygote; \* significant difference  $p < 0.05$ .

308 **CYP6P9a-R:** Among a total of 273 mosquitoes that were offered a blood meal 140 successfully  
309 fed (51.3%) whereas, 133 did not. Out of the 140 mosquitoes that blood-fed, 134 were  
310 successfully genotyped for *CYP6P9a-R* allele revealing that 23% (31/134), 50% (67/134) and  
311 27% (36/134) were homozygote resistant *CYP6P9a-RR*, heterozygotes *CYP6P9a-RS* and  
312 homozygote susceptible *CYP6P9a-SS*, respectively (Figure 2b). Among the unfed mosquitoes,  
313 11.3% (15/133) were homozygote resistant *CYP6P9a-RR*, 47.4% (63/133) heterozygotes and  
314 41.3% (55/133) were homozygote susceptible *CYP6P9a-SS*. The estimation of odds ratio  
315 showed that homozygote resistant *CYP6P9a-RR* mosquitoes are significantly more able to  
316 blood feed than homozygote susceptible (OR = 3.33; CI 95%: 1.4 -7.7;  $p=0.01$ ). No difference  
317 was observed between heterozygote and homozygote resistant *CYP6P9a-RR* (OR= 1.9, 95%CI:  
318 0.9-4.4;  $p=0.1$ ) neither with homozygote susceptible *CYP6P9a-SS* (OR= 1.7, 95%CI: 0.9-3.1;  
319  $p=0.1$ ) mosquitoes (Table 2). Moreover, it was overall observed that mosquitoes with the  
320 *CYP6P9a-R* resistant allele have a greater chance to blood feed than those bearing the  
321 susceptible allele (OR = 1.9; CI 95%: 1.03-3.2;  $p=0.04$ ) (Table 2).

### 322 **Impact of *L119F-GSTe2* mutation on probing and blood feeding duration**

323 Out of the 120 mosquitoes that were individually filmed to assess the influence of insecticide  
324 resistance genes on the probing and feeding duration, 7 (6.14%), 40 (35.08%) and 67 (58.77%)  
325 were genotyped as homozygous resistant 119F/F-RR, heterozygotes L119F-RS and  
326 homozygotes susceptible L/L119, respectively. Overall, regardless of the genotype, the median  
327 value of mosquito's probing duration was 49.5 seconds (minimum = 4s and maximum = 290s).  
328 No difference was observed in the probing time of resistant mosquitoes 119F/F-RR (Median =  
329 53 seconds) and heterozygotes L119F-RS (Median = 52s) compared to the homozygote  
330 susceptible L/L119 (Median = 52s).

331 Regarding the blood feeding duration, it was observed that the median and mean time for a  
332 mosquito to have a full blood meal was 249.5 seconds and  $303 \pm 181$  seconds respectively, with

333 a minimum = 68 seconds and a maximum = 772 seconds. The feeding duration was longer  
334 (median=269s) in L/L119 mosquitoes compared to L119F-RS (229.5s) and 119F/F-RR (214s)  
335 but the difference was not statistically significant ( $p=0.19$ , Kruskal-Wallis test).

336 **Impact of *L119F-GSTe2* and *CYP6P9a-R* mutations on the blood meal size of *An. funestus***

337 ***L119F-GSTe2*** : From 457 individuals that took a full blood meal it was observed that the  
338 average weighted blood meal of a mosquito regardless of the *L119F-GSTe2* genotype was 3.4  
339  $\mu\text{l}/\text{mg}$  (minimum = 1.2  $\mu\text{l}/\text{mg}$ ; maximum = 9.2  $\mu\text{l}/\text{mg}$ ). However, the weighted blood meal was  
340 not significantly different ( $P=0.17$ ; Kruskal-Wallis test; Figure 3a) in homozygote susceptible  
341 L119-SS (3.0 $\mu\text{l}/\text{mg}$ ) compared to homozygote resistant L119-RR (2.8 $\mu\text{l}/\text{mg}$ ) and heterozygote  
342 L119F-RS (3.3 $\mu\text{l}/\text{mg}$ ) mosquitoes. This result suggests that the *L119F-GSTe2* mutation may  
343 not affect the volume of blood meal ingested by *An. funestus*.

344 ***CYP6P9a-R***: The influence of the *CYP6P9a-R* mutation on the volume of blood meal taken by  
345 *An. funestus*, was assessed using the 134 blood fed mosquitoes that were successfully genotyped  
346 for *CYP6P9a-R* allele. Overall, irrespective of the genotype, the mean weighted blood volume  
347 ingested by a mosquito was  $4.8 \pm 2 \mu\text{l}/\text{mg}$  (minimum = 2  $\mu\text{l}/\text{mg}$ ; maximum = 13.3 $\mu\text{l}/\text{mg}$ ).  
348 However, the weighted blood meal volume of CYP6P9a-SS mosquitoes (Median = 3.71 $\mu\text{l}/\text{mg}$ )  
349 was lower than that of CYP6P9a-RS (Median = 4.73  $\mu\text{l}/\text{mg}$ ) and of CYP6P9a-RR (Median =  
350 4.78  $\mu\text{l}/\text{mg}$ ) (Figure 3;  $p<0.004$  for RS vs SS and  $p<0.006$  for RR vs SS, Mann-Whitney test).  
351 No difference in the volume of the blood meal was observed between CYP6P9a-RR and  
352 CYP6P9a-RS mosquitoes ( $P=0.7$ ; Mann-Whitney test). This result suggests that the over-  
353 expression of *CYP6P9a* gene is associated with an increase of the volume of the blood meal  
354 ingested by *An. funestus*.

355

356 **Expression profile of AAPP and D7 family salivary genes according to CYP6P9a-R**  
357 **genotypes**

358 Due to the association observed between the *CYP6P9a*-R genotypes and blood feeding, an  
359 attempt was made to assess whether the genotypes of this gene could impact the expression  
360 profile of key salivary genes. Analysis of the expression level of AAPP and 4 members of the  
361 D7 family salivary genes (D7r1, D7r2, D7r3 and D7r4) did not show a significant difference in  
362 expression in homozygote resistant (CYP6P9a-RR) and heterozygote (CYP6P9a-RS)  
363 mosquitoes when compared to homozygote susceptible genotype (CYP6P9a-SS) (Figure 4,  
364 Table 2) with average fold-change for all these genes lower than 1.5. This result suggests that  
365 *CYP6P9a*-R genotypes do not influence the expression profile of both AAPP and D7 family  
366 genes in the salivary glands of *An. funestus* mosquitoes.

367 **Discussion.**

368 Due to the absence of markers, the impact of metabolic resistance on life traits of *Anopheles*  
369 mosquitoes has been poorly elucidated. Recently, mutations in the *GST* epsilon 2 and in the  
370 promoter region of the cytochrome P450 *CYP6P9a*, were described as robust molecular  
371 markers for tracking metabolic resistance in pyrethroids resistant populations of *An. funestus*  
372 [22,24]. Using these two key markers, this study assess the impact of GST- and P450-based  
373 metabolic resistance to pyrethroids on the feeding process and blood meal volume of *An.*  
374 *funestus*.

375 ***Impact of metabolic resistance on blood feeding success***

376 The present study revealed that *CYP6P9a* but not the *L119F-GSTe2* mutation could impact the  
377 blood feeding success of *An. funestus* mosquito as possessing the *CYP6P9a* resistant allele  
378 increased the likelihood of being successful in blood-feeding. Such selective advantage of  
379 *CYP6P9a* resistance allele was also previously reported in a semi-field study in experimental

380 hut trial which observed that homozygous CYP6P9a-RR mosquitoes were significantly more  
381 likely to blood feed than susceptible SS [24]. This result suggests that CYP6P9a -mediated  
382 metabolic resistance might influence the ability of *An. funestus* mosquito to blood feed. In  
383 contrast, the absence of association observed here for the *L119F-GSTe2* mutation needed to be  
384 confirmed by further studies as the low sample of L119F-RR homozygote resistance  
385 mosquitoes might have biased our analysis. Nevertheless, the mechanism whereby *CYP6P9a*-  
386 R resistant allele could impact mosquito feeding is unknown and was not investigated in the  
387 present study. One hypothesis to explain this association could be related to the motivation of  
388 mosquito to blood feed. In fact, it has been reported that some mosquito individuals that  
389 emerged with insufficient teneral reserves require an initial blood meal to compensate for  
390 insufficient teneral reserves rather than for egg development during their first gonotrophic cycle  
391 [33-35]. This phenomenon is mostly observed in smaller female mosquitoes that emerge with  
392 insufficient reserve [2]. Thus, we can presume that *CYP6P9a* resistant mosquitoes which were  
393 found significantly smaller than susceptible in the present study were more motivated to blood  
394 feed as they were probably the ones requiring more to compensate for their insufficient teneral  
395 reserves. Further studies investigating the impact of insecticide resistance on the motivation of  
396 *An. funestus* mosquito to blood feed would probably help in confirming this hypothesis.

397

### 398 ***Impact of metabolic resistance on probing time and feeding duration***

399 The influence of metabolic resistance on probing time and feeding duration was assessed in the  
400 present study only for *L119F-GSTe2* mutation. Results revealed no significant impact of this  
401 metabolic resistance gene on the time spent by a mosquito to probe. The absence of impact of  
402 insecticide resistance on mosquito probing time was also reported for the *knock-down (kdr)*  
403 resistance gene in *Anopheles gambiae* with no difference in the probing time noticed between  
404 genotypes (RR, RS and SS) after exposure to untreated and insecticide-treated net [11]. This

405 seems to indicate that insecticide resistance might not impact the probing duration of *Anopheles*  
406 mosquito during blood feeding. However, this hypothesis must be taken with caution as, to our  
407 knowledge, and the exception of the present study as well as the one of Diop *et al*, very little  
408 information is available on the impact of insecticide resistance on the probing time during  
409 mosquito blood-feeding. In the other hand, even if the difference was not statistically  
410 significant, mosquitoes possessing an *L119F-GSTe2* resistant allele (both homozygous and  
411 heterozygous) spent less time taking their blood meal than susceptible. This corroborate with  
412 observation previously made for *kdr* mutation in *An. gambiae* with lower feeding duration for  
413 homozygous resistant mosquitoes than heterozygote and homozygous susceptible [11]. The  
414 non-significant result observed may be due to the low number of resistant mosquitoes in the  
415 present study. However, from the results, it could be hypothesized that *L119F-GSTe2* mutation  
416 might confer an advantage to homozygous resistant mosquitoes as it was previously reported  
417 that rapid feeding reduces the risk to be killed by the host defensive behaviour [11,36]. 

#### 418 ***Impact of metabolic resistance on blood meal volume***

 419 In the present study, we observed that the volume of blood ingested by a mosquito during a  
420 single blood feeding was associated with the genotype of the P450 *CYP6P9a* but not with the  
421 *L119F-GSTe2*-based metabolic resistance. This suggests that mechanisms involved in  
422 metabolic resistance to pyrethroids in *An. funestus* might influence mosquito life-traits  
423 differently. However, as already discussed above, we cannot exclude that the absence of the  
424 influence observed for *L119F-GSTe2* gene might also be related to the low number of L119F-  
425 RR mosquitoes used in the present study. This latter hypothesis seems moreover reinforced by  
426 the results of previous studies showing *L119F-GSTe2* mutation [23] and *CYP6P9a*-R resistance  
427 gene [37] affecting *An. funestus* fecundity in the same way. The positive association between  
428 *CYP6P9a*-R resistant allele and the volume of blood meal is a bit surprising knowing that  
429 activity of P450 monooxygenases as well as blood meal digestion, have been reported to generate



430 an excess production of reactive oxygen species (ROS) increasing oxidative stress which could  
431 induce several damages in the mosquito's system that can result to death [38,39]. In fact,  
432 because the *CYP6P9a*-R resistant allele was recently reported to be negatively associated with  
433 the fecundity of *An. funestus* [37], we were expecting to see *CYP6P9a* resistant mosquitoes  
434 taking lower blood meal than susceptible to reduce negative effects of oxidative stress. This  
435 suggests that association between the *CYP6P9a*-R resistant allele and mosquito's blood meal  
436 size could be an indirect consequence of some other physiological activities. For instance,  
437 because *CYP6P9a* resistant mosquitoes were significantly smaller than their susceptible  
438 counterparts, and noting that it has been demonstrated that the amount of teneral reserves is  
439 proportional to the body size of mosquito [2], we can presume that the high blood meal volume  
440 ingested by *CYP6P9a*-RR mosquitoes might be as a result of a need to compensate for the  
441 limited teneral reserves post emergence. In this case, the association observed here could be an  
442 indirect consequence of the negative impact of *CYP6P9a*-R resistant allele recently observed  
443 on the larval development of *An. funestus* [37] resulting to a small body size, and by  
444 consequence to insufficient teneral reserves for resistant mosquitoes. Indeed, it was  
445 demonstrated that encountering a nutritional environment by *Anopheles* larvae strongly  
446 influences adult fitness-related traits such as body size and teneral metabolic reserves [2,30,40].  
447 However, our finding did not corroborate with the positive association previously reported  
448 between the volume of ingested blood meal and mosquito body size [2]. Further studies will  
449 help elucidate the underlying reason of this correlation between *CYP6P9a* genotypes and blood  
450 meal size.

#### 451 ***Influence of CYP6P9a-R resistant allele on salivary gland genes expression***

452 To obtain a successful blood meal, a female mosquito must balance the risk of death caused by  
453 host defensive behavior against the benefits to feed on a host species that maximize fertility  
454 [41]. Salivary components permit mosquitoes to reduce their engorgement time and increase

455 their likelihood of survival [5]. In the present study, we assessed the level of expression of genes  
456 encoding for some salivary proteins known to be involved on blood intake process of  
457 mosquitoes such as, AAPP and members of D7 family proteins [6,42,43]. The comparative  
458 analysis of the expression level of these genes between *CYP6P9a* genotypes showed no  
459 significant difference between mosquitoes bearing the resistant allele and those with the  
460 susceptible one. This result suggests that the expression of AAPP and D7 family salivary genes  
461 are not associated to the *CYP6P9a* mutation. This observation is intriguing as some salivary  
462 genes such as D7 family genes were previously reported to be over-expressed in resistant *An.*  
463 *funestus* mosquito compared to susceptible strain [22,44-47]. The lack of significance observed  
464 with the differential expression of genes in the present study could be explained by the fact that,  
465 our analyses in this study were performed on mosquitoes obtained after reciprocal crosses  
466 between two different strains and therefore sharing the same background, while other studies  
467 compared insecticide resistant field mosquitoes and susceptible laboratory strains. The absence  
468 of influence of the *CYP6P9a* gene on the expression level of salivary gland genes involved in  
469 the blood feeding process observed in the present study appears to indicate that the association  
470 found between this gene and the size of blood meal taken by *An. funestus* mosquito might not  
471 be related to the expression of these salivary genes encoding proteins which mediate the blood  
472 meal process.

473 This study revealed that GSTe2-mediated resistance does not affect the blood meal intake of  
474 *An. funestus* mosquitoes, whereas *CYP6P9a*-based resistance to pyrethroids is associated with  
475 a feeding success and a higher blood meal size. However, this influence on *Anopheles funestus*  
476 blood meal intake is not associated with differential expression of major salivary gland proteins  
477 involved in blood-feeding. Given the rapid growth of insecticide resistance, it would be  
478 interesting to study how this association could impact the fecundity and the vectorial capacity  
479 of *An. funestus* mosquitoes.

480 **Author Contributions:** E.E.N and C.S.W conceived the study; EEN, L.N, C.N SK and  
481 C.S.W designed the study; E.E.N, .L.N, A.B, T.A and M.T carried out the sample  
482 collection; L.N, A.B, and T.A reared and maintained the strain in the insectary; E.E.N, L.N  
483 A.B, and T.A performed blood feeding experiments. L.N, T.A and M.T performed the  
484 molecular analyses; E.E.N, L.N, A.B, M.T and C.N analyzed the data; E.E.N, L.N and  
485 C.S.W wrote the manuscript. M.T C.N and S.K reviewed the manuscript. All authors  
486 approved the manuscript.

#### 487 **Ethical approval and consent to participate**

488 Ethical clearance was obtained from the National Ethics Committee of Cameroon's Ministry of  
489 Public Health (N°2018/04/1000/CE/CNERSH/SP) in conformity to the WMA Declaration of  
490 Helsinki. Informed verbal consent was obtained from household owners for using their houses  
491 for mosquito collection.

492 **Acknowledgments:** We thank Dr Micheal KUSIMO and Mr Francis NKEMNGO; native  
493 speakers of English language for accepting to review and edit this paper.

494 **Funding:** This study was funded by a Wellcome Trust Training fellowship  
495 (109930/Z/15/Z) awarded to ELANGA N'DILLE Emmanuel.

496 **Conflicts of Interest:** The authors declare no conflicts of interests.

497

498

499

500

501

502 **References**

- 503 1. WHO (2019) World Malaria Report 2019, Geneva: World Health Organization; 2019.  
504 Licence: CC BY-NC-SA 3.0 IGO.
- 505 2. Briegel H (1990) Fecundity, metabolism, and body size in *Anopheles* (Diptera: *Culicidae*),  
506 vectors of malaria. *Journal of medical entomology* 27: 839-850.
- 507 3. Hurd H (2003) Manipulation of medically important insect vectors by their parasites. *Annual*  
508 *review of entomology* 48: 141-161. 
- 509 4. Roitberg BD, Gordon I (2005) Does the *Anopheles* blood meal-fecundity curve, curve?  
510 *Journal of Vector Ecology* 30: 83.
- 511 5. Ribeiro J (2000) Blood- feeding in mosquitoes: probing time and salivary gland anti-  
512 haemostatic activities in representatives of three genera (*Aedes*, *Anopheles*, *Culex*).  
513 *Medical and veterinary entomology* 14: 142-148.
- 514 6. Islam A, Emran TB, Yamamoto DS, Iyori M, Amelia F, et al. (2019) Anopheline antiplatelet  
515 protein from mosquito saliva regulates blood feeding behavior. *Scientific reports* 9:  
516 3129.
- 517 7. Thiévent K, Hauser G, Elaian O, Koella JC (2019) The interaction between permethrin  
518 exposure and malaria infection affects the host-seeking behaviour of mosquitoes.  
519 *Malaria journal* 18: 79.
- 520 8. Taylor P, Hurd H (2001) The influence of host haematocrit on the blood feeding success of  
521 *Anopheles stephensi*: implications for enhanced malaria transmission. *Parasitology* 122:  
522 491-496.
- 523 9. Edman JD, Lynn HC (1975) Relationship between blood meal volume and ovarian  
524 development in *Culex nigripalpus* (Diptera: *Culicidae*). *Entomologia experimentalis et*  
525 *applicata* 18: 492-496.
- 526 10. Lehane MJ (2005) *The biology of blood-sucking in insects*: Cambridge University Press.
- 527 11. Diop MM, Chandre F, Rossignol M, Porciani A, Chateau M, et al. (2019) Sub-lethal  
528 insecticide exposure affects host biting efficiency of Kdr-resistant *Anopheles gambiae*.  
529 bioRxiv: 653980.
- 530 12. Bhatt S, Weiss D, Cameron E, Bisanzio D, Mappin B, et al. (2015) The effect of malaria  
531 control on *Plasmodium falciparum* in Africa between 2000 and 2015. *Nature* 526: 207.
- 532 13. Ranson H, N'guessan R, Lines J, Moiroux N, Nkuni Z, et al. (2011) Pyrethroid resistance  
533 in African anopheline mosquitoes: what are the implications for malaria control? *Trends*  
534 *in parasitology* 27: 91-98.

- 535 14. Strode C, Donegan S, Garner P, Enayati AA, Hemingway J (2014) The impact of pyrethroid  
536 resistance on the efficacy of insecticide-treated bed nets against African anopheline  
537 mosquitoes: systematic review and meta-analysis. PLoS medicine 11.
- 538 15. Martinez- Torres D, Chandre F, Williamson M, Darriet F, Berge JB, et al. (1998) Molecular  
539 characterization of pyrethroid knockdown resistance (kdr) in the major malaria vector  
540 *Anopheles gambiae* ss. Insect molecular biology 7: 179-184.
- 541 16. Ranson H, Jensen B, Vulule J, Wang X, Hemingway J, et al. (2000) Identification of a point  
542 mutation in the voltage- gated sodium channel gene of Kenyan *Anopheles gambiae*  
543 associated with resistance to DDT and pyrethroids. Insect molecular biology 9: 491-  
544 497.
- 545 17. Berticat C, Boquien G, Raymond M, Chevillon C (2002) Insecticide resistance genes induce  
546 a mating competition cost in *Culex pipiens* mosquitoes. Genetics Research 79: 41-47.
- 547 18. ROWLAND M (1991) Behaviour and fitness of  $\gamma$ HCH/dieldrin resistant and susceptible  
548 female *Anopheles gambiae* and *An. stephensi* mosquitoes in the absence of insecticide.  
549 Medical and Veterinary Entomology 5: 193-206.
- 550 19. Saingamsook J, Yanola J, Lumjuan N, Walton C, Somboon P (2019) Investigation of  
551 Relative Development and Reproductivity Fitness Cost in Three Insecticide-Resistant  
552 Strains of *Aedes aegypti* from Thailand. Insects 10: 265.
- 553 20. Kumar K, Sharma AK, Kumar S, Patel S, Sarkar M, et al. (2011) Multiple insecticide  
554 resistance/susceptibility status of *Culex quinquefasciatus*, principal vector of  
555 bancroftian filariasis from filaria endemic areas of northern India. Asian Pacific journal  
556 of tropical medicine 4: 426-429.
- 557 21. Martins AJ, Bellinato DF, Peixoto AA, Valle D, Lima JBP (2012) Effect of insecticide  
558 resistance on development, longevity and reproduction of field or laboratory selected  
559 *Aedes aegypti* populations. PloS one 7: e31889.
- 560 22. Riveron JM, Yunta C, Ibrahim SS, Djouaka R, Irving H, et al. (2014) A single mutation in  
561 the *GSTe2* gene allows tracking of metabolically based insecticide resistance in a major  
562 malaria vector. Genome biology 15: R27.
- 563 23. Tchouakui M, Riveron JM, Djonabaye D, Tchapgwa W, Irving H, et al. (2018) Fitness Costs  
564 of the Glutathione S-Transferase Epsilon 2 (*L119F-GSTe2*) Mediated Metabolic  
565 Resistance to Insecticides in the Major African Malaria Vector *Anopheles Funestus*.  
566 Genes 9: 645.
- 567 24. Weedall GD, Mugenzi LM, Menze BD, Tchouakui M, Ibrahim SS, et al. (2019) A  
568 cytochrome P450 allele confers pyrethroid resistance on a major African malaria vector,

- 569 reducing insecticide-treated bednet efficacy. *Science translational medicine* 11:  
570 eaat7386.
- 571 25. Menze BD, Riveron JM, Ibrahim SS, Irving H, Antonio-Nkondjio C, et al. (2016) Multiple  
572 insecticide resistance in the malaria vector *Anopheles funestus* from Northern Cameroon  
573 is mediated by metabolic resistance alongside potential target site insensitivity  
574 mutations. *PloS one* 11: e0163261.
- 575 26. Morgan JC, Irving H, Okedi LM, Steven A, Wondji CS (2010) Pyrethroid resistance in an  
576 *Anopheles funestus* population from Uganda. *PLoS One* 5: e11872.
- 577 27. Hunt R, Brooke B, Pillay C, Koekemoer L, Coetzee M (2005) Laboratory selection for and  
578 characteristics of pyrethroid resistance in the malaria vector *Anopheles funestus*.  
579 *Medical and veterinary entomology* 19: 271-275.
- 580 28. Riveron JM, Irving H, Ndula M, Barnes KG, Ibrahim SS, et al. (2013) Directionally selected  
581 cytochrome P450 alleles are driving the spread of pyrethroid resistance in the major  
582 malaria vector *Anopheles funestus*. *Proceedings of the National Academy of Sciences*  
583 110: 252-257.
- 584 29. Wondji CS, Irving H, Morgan J, Lobo NF, Collins FH, et al. (2009) Two duplicated P450  
585 genes are associated with pyrethroid resistance in *Anopheles funestus*, a major malaria  
586 vector. *Genome research* 19: 452-459.
- 587 30. Briegel H, Lea AO, Klowden MJ (1979) Hemoglobinometry as a method for measuring  
588 blood meal sizes of mosquitoes (Diptera: *Culicidae*). *Journal of Medical Entomology*  
589 15: 235-238.
- 590 31. Livak KJ (1984) Organization and mapping of a sequence on the *Drosophila melanogaster*  
591 X and Y chromosomes that is transcribed during spermatogenesis. *Genetics* 107: 611-  
592 634.
- 593 32. Koekemoer L, Kamau L, Hunt R, Coetzee M (2002) A cocktail polymerase chain reaction  
594 assay to identify members of the *Anopheles funestus* (Diptera: *Culicidae*) group. *The*  
595 *American journal of tropical medicine and hygiene* 66: 804-811.
- 596 33. Klowden MJ, Lea AO (1978) Blood meal size as a factor affecting continued host-seeking  
597 by *Aedes aegypti* (L.). *The American journal of tropical medicine and hygiene* 27: 827-  
598 831.
- 599 34. Ramasamy M, Srikrishnaraj K, Hadjirin N, Perera S, Ramasamy R (2000) Physiological  
600 aspects of multiple blood feeding in the malaria vector *Anopheles tessellatus*. *Journal*  
601 *of insect physiology* 46: 1051-1059.

- 602 35. Takken W, van Loon JJ, Adam W (2001) Inhibition of host-seeking response and olfactory  
603 responsiveness in *Anopheles gambiae* following blood feeding. Journal of insect  
604 physiology 47: 303-310.
- 605 36. Lyimo IN, Haydon DT, Mbina KF, Daraja AA, Mbehela EM, et al. (2012) The fitness of  
606 African malaria vectors in the presence and limitation of host behaviour. Malaria journal  
607 11: 425.
- 608 37. Tchouakui M, Jacob Riveron M, Mugenzi LMJ, Djonabaye D, Wondji MJ, et al. (2020)  
609 Cytochrome P450 metabolic resistance (*CYP6P9a*) to pyrethroids imposes a fitness cost  
610 in the major African malaria vector *Anopheles funestus*. Genetics Society.
- 611 38. Rivero A, Vézilier J, Weill M, Read AF, Gandon S (2010) Insecticide Control of Vector-  
612 Borne Diseases: When Is Insecticide Resistance a Problem? PLoS Pathog 6.
- 613 39. Saeaeu L, Phumala Morales N, Komalamisra N, Vargas RM (2011) Antioxidative systems  
614 defense against oxidative stress induced by blood meal in *Aedes aegypti*. Southeast  
615 Asian Journal of Tropical Medicine and Public Health 42: 542.
- 616 40. Telang A, Wells MA (2004) The effect of larval and adult nutrition on successful  
617 autogenous egg production by a mosquito. Journal of Insect Physiology 50: 677-685.
- 618 41. Edman JD, Scott TW (1987) Host defensive behaviour and the feeding success of  
619 mosquitoes. International Journal of Tropical Insect Science 8: 617-622.
- 620 42. Calvo E, Dao A, Pham VM, Ribeiro JMC (2007) An insight into the sialome of *Anopheles*  
621 *funestus* reveals an emerging pattern in anopheline salivary protein families. Insect  
622 Biochem Mol Biol 37: 164-175.
- 623 43. Calvo E, Mans BJ, Andersen JF, Ribeiro JM (2006) Function and evolution of a mosquito  
624 salivary protein family. J Biol Chem 281.
- 625 44. Elanga-Ndille E, Nouage L, Binyang A, Assatse T, Tene-Fossog B, et al. (2019)  
626 Overexpression of two members of D7 salivary genes family is associated with  
627 pyrethroid resistance in the malaria vector *Anopheles funestus* ss but not in *Anopheles*  
628 *gambiae* in Cameroon. Genes 10: 211.
- 629 45. Riveron JM, Ibrahim SS, Chanda E, Mzilahowa T, Cuamba N, et al. (2014) The highly  
630 polymorphic *CYP6M7* cytochrome P450 gene partners with the directionally selected  
631 *CYP6P9a* and *CYP6P9b* genes to expand the pyrethroid resistance front in the malaria  
632 vector *Anopheles funestus* in Africa. BMC genomics 15: 817.
- 633 46. Samb B, Konate L, Irving H, Riveron JM, Dia I, et al. (2016) Investigating molecular basis  
634 of lambda-cyhalothrin resistance in an *Anopheles funestus* population from Senegal.  
635 Parasites & vectors 9: 449.

636 47. Wilding C, Weetman D, Rippon E, Steen K, Mawejje H, et al. (2015) Parallel evolution or  
637 purifying selection, not introgression, explains similarity in the pyrethroid  
638 detoxification linked *GSTE4* of *Anopheles gambiae* and *An. arabiensis*. *Molecular*  
639 *genetics and genomics* 290: 201-215.

640

641

642

643

644

645

646

647

648

649

650

651

652

653

654

655

656

657

658

659

660

661

662

663

664

665



666

667

## 668 **Figures legend**

669 **Figure 1:** Distribution of genotypes of *L119F-GSTe2* (A) and *CYP6P9a-R* (B) markers  
670 according to *An. funestus* mosquito weight

671 **Figure 2:** Distribution of *L119F-GSTe2* (A) and *CYP6P9a-R* (B) genotypes between blood-fed  
672 and unfed *An. funestus* mosquitoes.

673 **Figure 3:** Blood meal size of *An. funestus* mosquitoes according to their *L119F-GSTe2* (A) and  
674 *CYP6P9a-R* (B) genotypes.

675 **Figure 4:** Expression level of AAPP and some members of D7 family genes in *CYP6P9a-RR*  
676 and *CYP6P9a-RS* mosquitoes in comparison with *CYP6P9a* susceptible mosquitoes. The  
677 dotted line indicates genes expression level in *CYP6P9a* susceptible mosquitoes used as  
678 standard. 

679

680

681

682

683

684

685

686

687

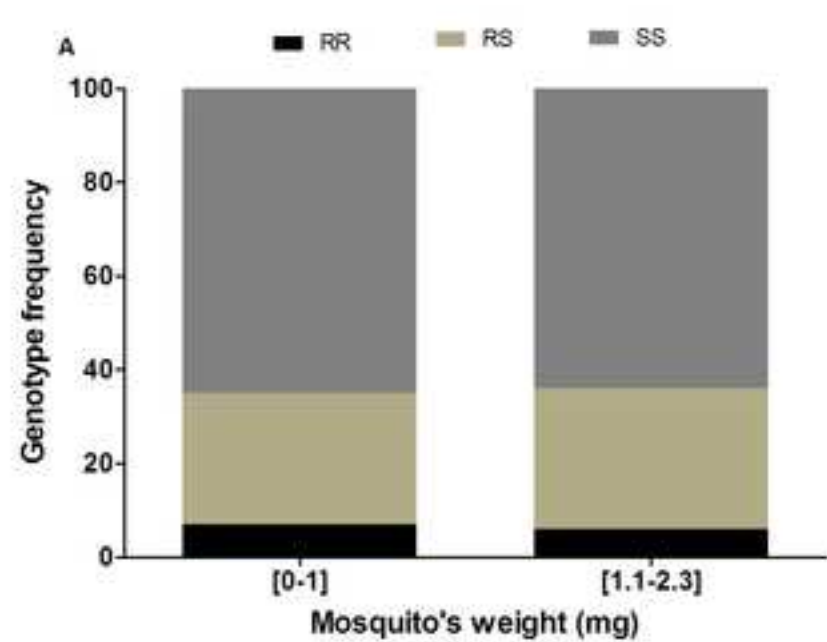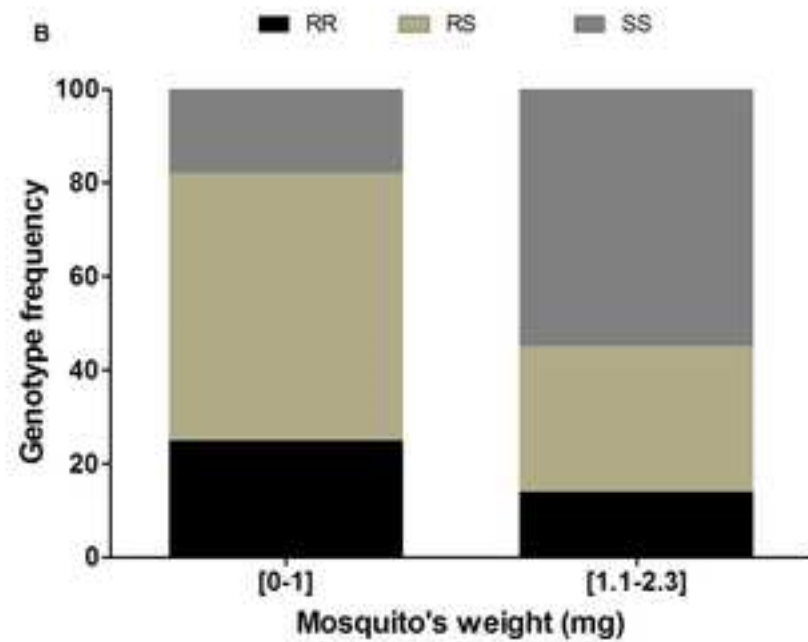

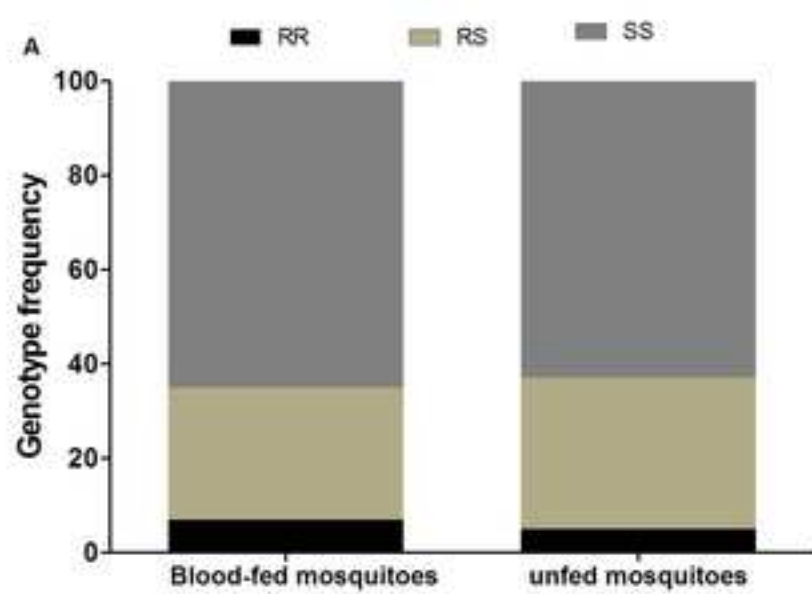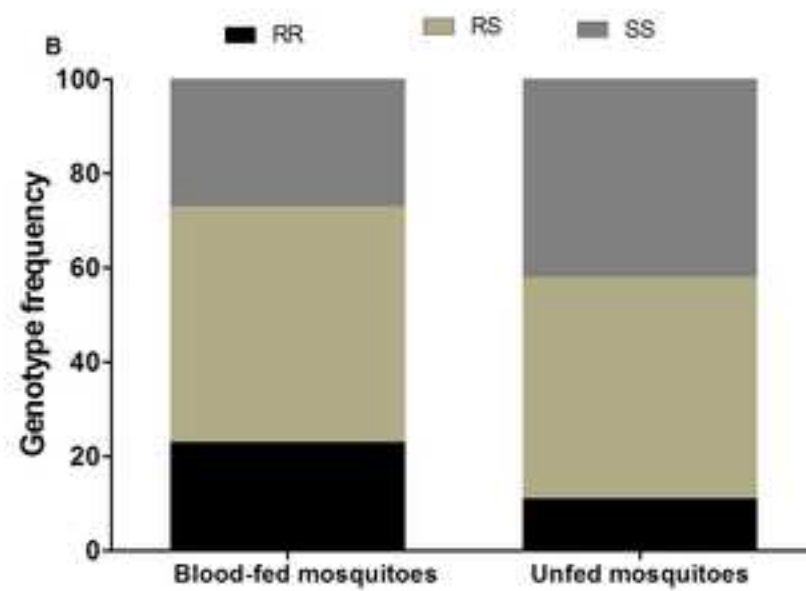

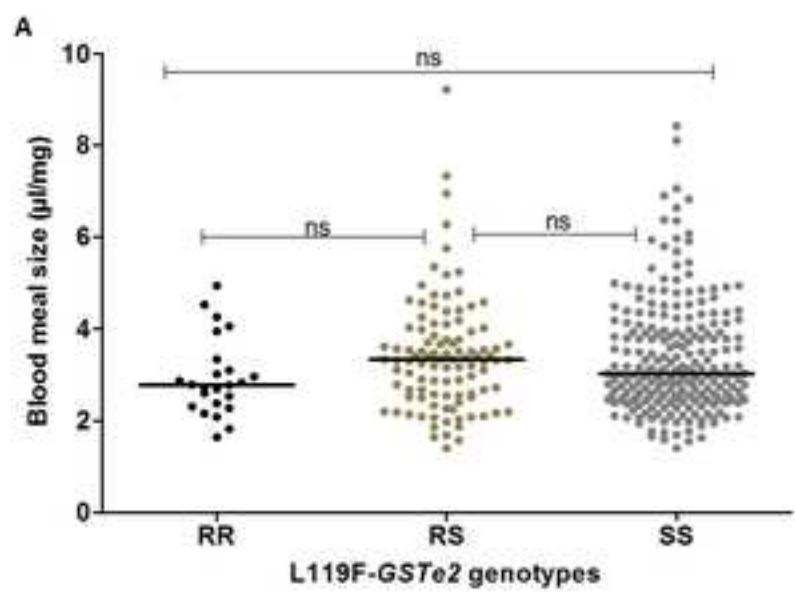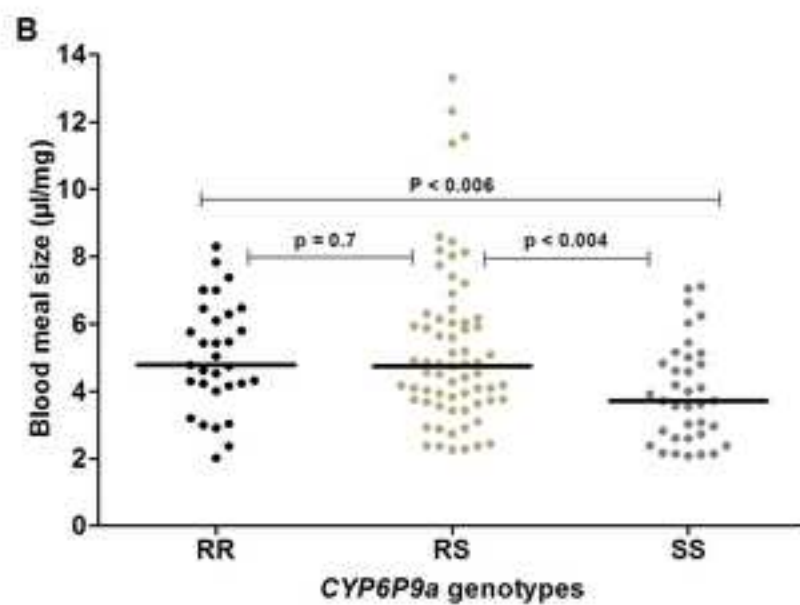

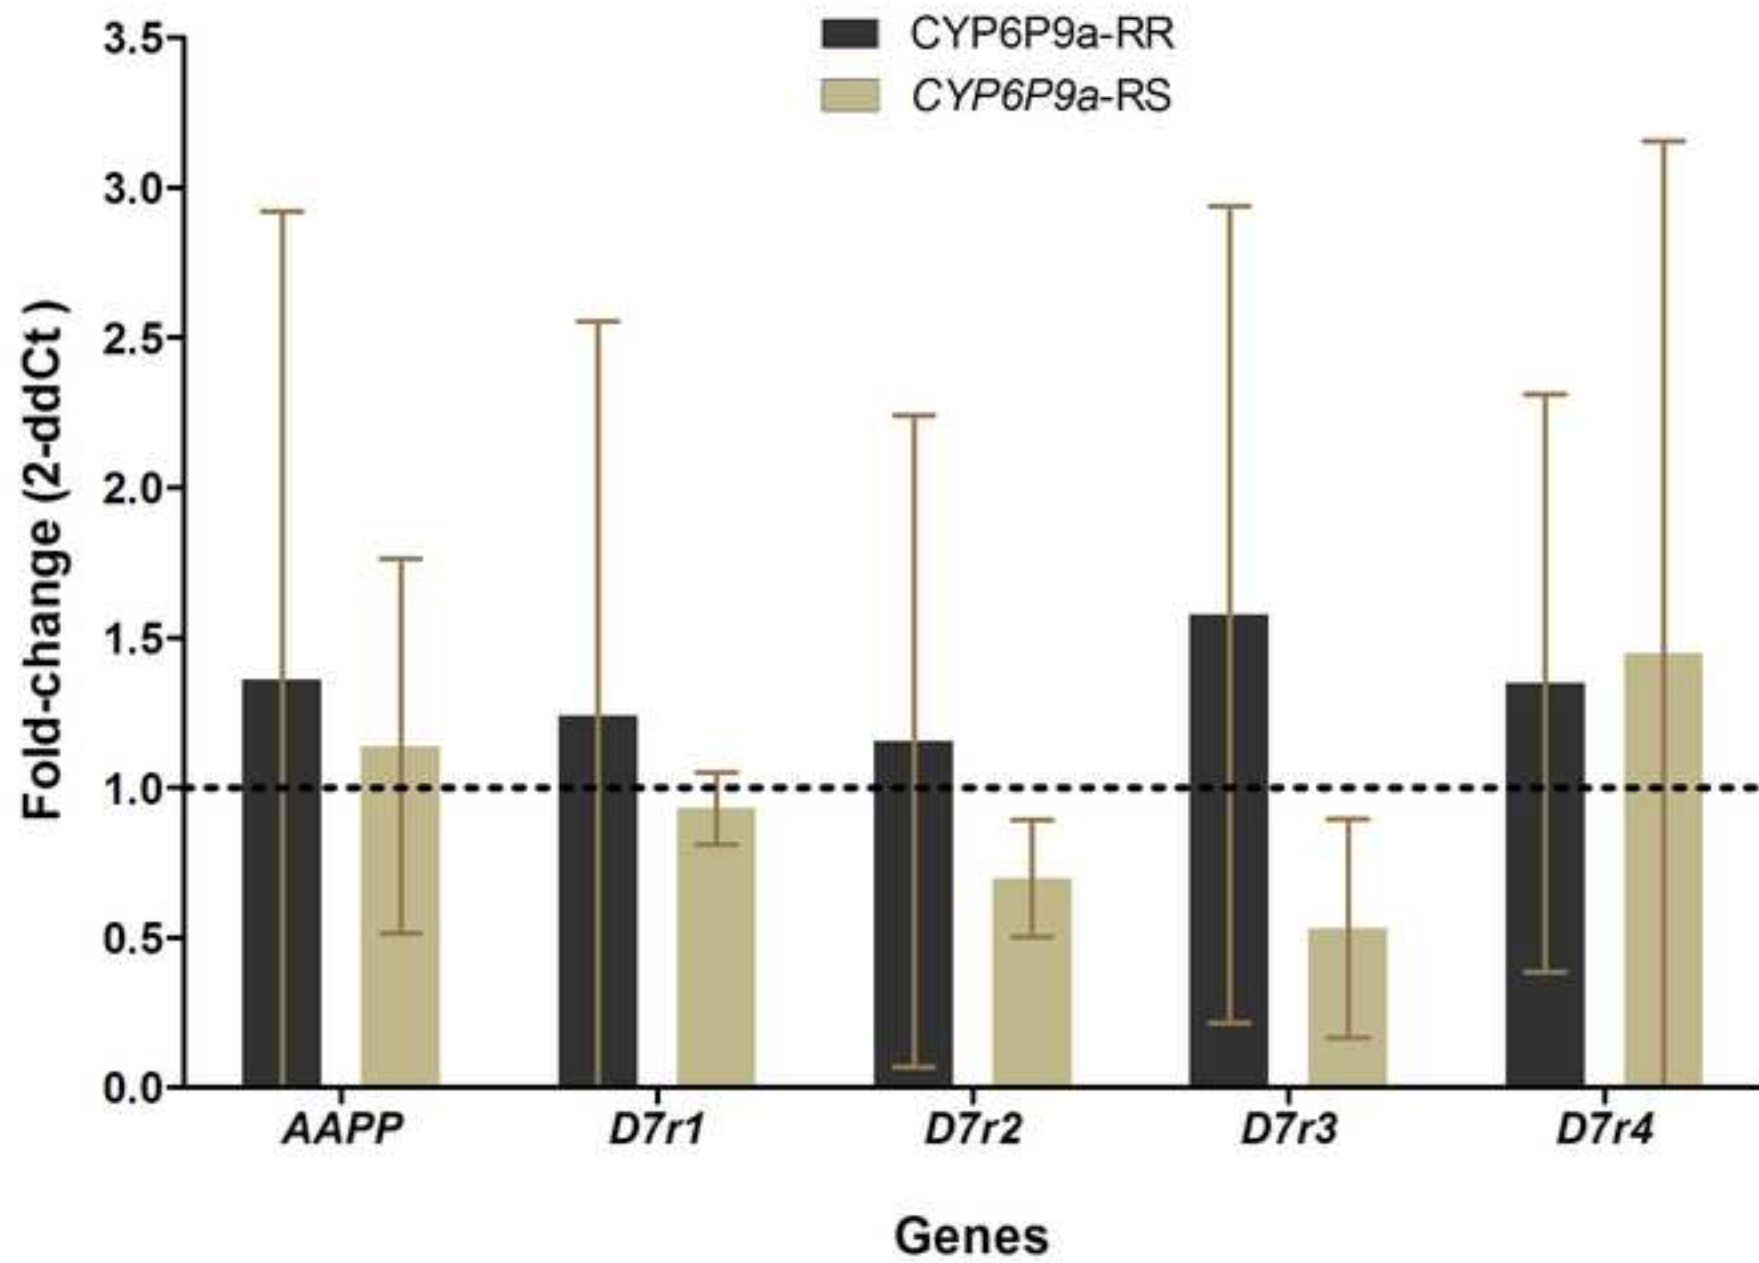

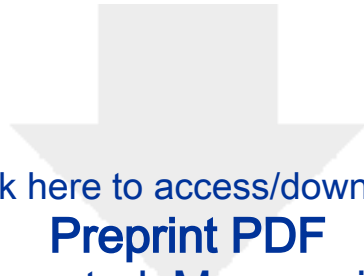

Click here to access/download

**Preprint PDF**

Nouage et al\_Manuscript .pdf

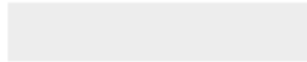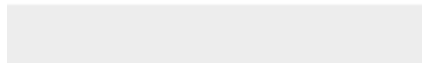

Supplement: pone.0230984.s002.pdf [file pone.0230984.s002.pdf]
