# Supplementary material for: Influence of GST- and P450-based metabolic resistance to pyrethroids on blood feeding in the major African malaria vector Anopheles funestus
Source: PubMed Central journal article supplement (PMC7500606; doi:10.1371/journal.pone.0230984), 2020-09-18
Supplement: pone.0230984.s004.pdf [file pone.0230984.s004.pdf]

# PLOS ONE

## Influence of GST- and P450-based metabolic resistance to pyrethroids on blood feeding in the major African malaria vector *Anopheles funestus* --Manuscript Draft--

|                               |                                                                                                                                                                                                                                                                                                                                                                                                                                                                                                                                                                                                                                                                                                                                                                                                                                                                                                                                                                                                                                                                                                                                                                                                                                                                                                                                                                                                                                                                                                                                                                                                                                                                                                                                                                                                        |
|-------------------------------|--------------------------------------------------------------------------------------------------------------------------------------------------------------------------------------------------------------------------------------------------------------------------------------------------------------------------------------------------------------------------------------------------------------------------------------------------------------------------------------------------------------------------------------------------------------------------------------------------------------------------------------------------------------------------------------------------------------------------------------------------------------------------------------------------------------------------------------------------------------------------------------------------------------------------------------------------------------------------------------------------------------------------------------------------------------------------------------------------------------------------------------------------------------------------------------------------------------------------------------------------------------------------------------------------------------------------------------------------------------------------------------------------------------------------------------------------------------------------------------------------------------------------------------------------------------------------------------------------------------------------------------------------------------------------------------------------------------------------------------------------------------------------------------------------------|
| <b>Manuscript Number:</b>     | PONE-D-20-07208R1                                                                                                                                                                                                                                                                                                                                                                                                                                                                                                                                                                                                                                                                                                                                                                                                                                                                                                                                                                                                                                                                                                                                                                                                                                                                                                                                                                                                                                                                                                                                                                                                                                                                                                                                                                                      |
| <b>Article Type:</b>          | Research Article                                                                                                                                                                                                                                                                                                                                                                                                                                                                                                                                                                                                                                                                                                                                                                                                                                                                                                                                                                                                                                                                                                                                                                                                                                                                                                                                                                                                                                                                                                                                                                                                                                                                                                                                                                                       |
| <b>Full Title:</b>            | Influence of GST- and P450-based metabolic resistance to pyrethroids on blood feeding in the major African malaria vector <i>Anopheles funestus</i>                                                                                                                                                                                                                                                                                                                                                                                                                                                                                                                                                                                                                                                                                                                                                                                                                                                                                                                                                                                                                                                                                                                                                                                                                                                                                                                                                                                                                                                                                                                                                                                                                                                    |
| <b>Short Title:</b>           | Bloodfeeding process and insecticide resistance in <i>Anopheles funestus</i> mosquito                                                                                                                                                                                                                                                                                                                                                                                                                                                                                                                                                                                                                                                                                                                                                                                                                                                                                                                                                                                                                                                                                                                                                                                                                                                                                                                                                                                                                                                                                                                                                                                                                                                                                                                  |
| <b>Corresponding Author:</b>  | Lynda DJOUNKWA NOUAGE, Msc<br>Centre for research in Infectious diseases (CRID)<br>Yaounde, CAMEROON                                                                                                                                                                                                                                                                                                                                                                                                                                                                                                                                                                                                                                                                                                                                                                                                                                                                                                                                                                                                                                                                                                                                                                                                                                                                                                                                                                                                                                                                                                                                                                                                                                                                                                   |
| <b>Keywords:</b>              | Malaria, Mosquito, <i>Anopheles funestus</i> , Insecticide resistance, Metabolic resistance, GST, P450, Blood meal intake                                                                                                                                                                                                                                                                                                                                                                                                                                                                                                                                                                                                                                                                                                                                                                                                                                                                                                                                                                                                                                                                                                                                                                                                                                                                                                                                                                                                                                                                                                                                                                                                                                                                              |
| <b>Abstract:</b>              | <p>Insecticide resistance genes are often associated with pleiotropic effects on various mosquito life-history traits. However, very little information is available on the impact of insecticide resistance on blood feeding process in mosquitoes. Here, using two recently detected DNA-based metabolic markers in the major malaria vector, <i>An. funestus</i>, we investigated how metabolic resistance genes could affect the blood meal intake. After allowing both the field F1 and lab F8 <i>Anopheles funestus</i> strains to feed on the human arm for 30 minutes, we assessed the association between key parameters of blood meal process including, probing time, feeding duration, blood feeding success, blood meal size, and markers of glutathione S-transferase (L119F-GSTe2) and cytochrome P450 (CYP6P9a<sub>R</sub>) - mediated metabolic resistance. None of the parameters of blood meal process was associated with L119F-GSTe2 genotypes. By contrast, for CYP6P9a<sub>R</sub>, homozygous resistant mosquitoes were significantly more able to blood-feed than homozygous susceptible (OR = 3.3; CI 95%: 1.4-7.7; P = 0.01) mosquitoes. Moreover, the volume of blood meal ingested by CYP6P9a-SS mosquitoes was lower than that of CYP6P9a-RS (P &lt; 0.004) and of CYP6P9a-RR (P &lt; 0.006). This suggests that CYP6P9a genes linked with the feeding success and blood meal size of <i>An. funestus</i>. However, no correlation was found in the expression of CYP6P9a and that of genes encoding for salivary proteins involved in blood meal process.</p> <p>This study suggests that P450-based metabolic resistance may influence the blood feeding process of <i>Anopheles funestus</i> mosquito and consequently its ability to transmit malaria parasites.</p> |
| <b>Order of Authors:</b>      | <p>Lynda NOUAGE, Msc</p> <p>Emmanuel ELANGA-NDILLE</p> <p>Achille Binyang</p> <p>Magellan Tchouakui</p> <p>Tatiane ATSATSE</p> <p>Cyrille Ndo</p> <p>Sévilor KEKEUNOU</p> <p>Charles S. Wondji</p>                                                                                                                                                                                                                                                                                                                                                                                                                                                                                                                                                                                                                                                                                                                                                                                                                                                                                                                                                                                                                                                                                                                                                                                                                                                                                                                                                                                                                                                                                                                                                                                                     |
| <b>Response to Reviewers:</b> | <p>Editor's comments</p> <p>1. Please ensure that your manuscript meets PLOS ONE's style requirements, including those for file naming. The PLOS ONE style templates can be found at <a href="https://journals.plos.org/plosone/s/file?id=wjVg/PLOOne_formatting_sample_main_body.pdf">https://journals.plos.org/plosone/s/file?id=wjVg/PLOOne_formatting_sample_main_body.pdf</a> and <a href="https://journals.plos.org/plosone/s/file?id=ba62/PLOOne_formatting_sample_title_authors_affiliations.pdf">https://journals.plos.org/plosone/s/file?id=ba62/PLOOne_formatting_sample_title_authors_affiliations.pdf</a>.</p> <p>Thank you for this remark, the manuscript have been check completely for any</p>                                                                                                                                                                                                                                                                                                                                                                                                                                                                                                                                                                                                                                                                                                                                                                                                                                                                                                                                                                                                                                                                                        |

formatting mistake.

2. We noticed you have some minor occurrence of overlapping text with the following previous publication(s), which needs to be addressed:

<https://journals.plos.org/plosone/article?id=10.1371%2Fjournal.pone.0103816>

<https://www.mdpi.com/2075-4450/10/9/265/htm>

Answer: This observation was taken into account and we insured to strongly eliminated the overlapping even if we didn't know exactly which part of the text is overlapping In your revision ensure you cite all your sources (including your own works), and quote or rephrase any duplicated text outside the methods section. Further consideration is dependent on these concerns being addressed.

Answer: Thank you so much for highlighting this. We have rephrased all the duplicated text detected and referenced the remaining parts as you can see in the revised version 3. In your Methods, please describe exactly how volunteers were recruited to provide blood meals in your study.

Answer: Thank you for this observation. This point was taken into account and a sentence describing briefly how volunteers were recruited to provide blood meal has been added in the revised manuscript (see lines 146 To 149).

4. PLOS requires an ORCID iD for the corresponding author in Editorial Manager on papers submitted after December 6th, 2016. Please ensure that you have an ORCID iD and that it is validated in Editorial Manager. To do this, go to 'Update my Information' (in the upper left-hand corner of the main menu), and click on the Fetch/Validate link next to the ORCID field. This will take you to the ORCID site and allow you to create a new iD or authenticate a pre-existing iD in Editorial Manager. Please see the following video for instructions on linking an ORCID iD to your Editorial Manager account: [https://www.youtube.com/watch?v=\\_xcclfvvtxQ](https://www.youtube.com/watch?v=_xcclfvvtxQ)

Answer: Thank you so much for mentioning this. I created an ORCID iD which allowed to submit the revised version of the manuscript

5. Thank you for stating the following in the Acknowledgments Section of your manuscript:

'This study was funded by a Wellcome Trust Training fellowship (109930/Z/15/Z) awarded to ELANGA N'DILLE Emmanuel.

We note that you have provided funding information that is not currently declared in your Funding Statement. However, funding information should not appear in the Acknowledgments section or other areas of your manuscript. We will only publish funding information present in the Funding Statement section of the online submission form.

Please remove any funding-related text from the manuscript and let us know how you would like to update your Funding Statement. Currently, your Funding Statement reads as follows:

'The funders had no role in study design, data collection and analysis, decision to publish, or preparation of the manuscript'

Answer: This observation was taking in consideration and the funding-related text have been removed from the manuscript.

Reviewer #1: It is a technically well executed study and the manuscript well written and presented.

The subject is interesting. I would request that the authors please consider a few points in their revised version:

1. In general, I think "impact" of CYP6P9a-R genotypes on several blood feeding behavior parametres is too strong. Please consider replacing impact (causal factor?) with "possible association" or similar alternative term

For example, Line 358: "Due to the association observed between the CYP6P9a-R genotypes and blood feeding, an attempt was made to assess whether the genotypes of this gene could impact the expression profile of key salivary genes" and 451 influence of CYP6P9a-R resistant allele on salivary gland genes expression I am not sure what is meant, how would the CYP6P9a-R IMPACT or Influence the expression of salivary glands? (Please consider alternative "possible association" term.)

Answer: We thank the reviewer for this comment. We agree with him that talking about 'impact' in our study could be too strong to characterise our observations. According to its recommendation, we have replaced the term "impact" by "possible association or effect" in the entire revised manuscript.

2. Assuming volume of blood meal ingested by CYP6P9a-R mosquitoes was (slightly) lower than that of CYP6P9a-S, does that mean vectorial capacity is also affected? Please justify the link, or tone down the statement

Line 45 “This study suggests that P450-based metabolic resistance may increase the blood feeding ability of malaria vectors and potentially impacting their vectorial capacity” contradicts with line 477 “interesting to study how this association could impact the fecundity and the vectorial capacity of *An. funestus* mosquitoes”

Answer: We thank the reviewer for this remark. Does assumption that volume of blood meal ingested by CYP6P9a-R mosquitoes was (slightly) lower than that of CYP6P9a-S means that vectorial capacity is also affected? That is an interesting question to be investigated. At this stage, since we did not evaluate this aspect, we are just making hypothesis that association between the CYP6P9a-R allele and the volume of blood meal ingested may potentially influence the vectorial capacity. Indeed, since the vectorial capacity is a concept analogous which is a function of the vector's density in relation to its vertebrate host, it could be influenced by the variations in mosquito's density in one area. So, given that mosquitoes' density hardly depends to mosquito fecundity and that the latter is itself significantly associated with the volume of blood meal ingested, we are hypothesising that, lower volume of blood meal ingested by CYP6P9a-R mosquitoes could affect its fecundity by reducing the number of eggs they lay. The reduction of the number of eggs laid would led to the decrease of the density of CYP6P9a-R mosquitoes in a given population and therefore to a reduction of vectorial capacity of these mosquitoes. However, since we did not assess this impact on the vectorial capacity and because vectorial capacity depends also to other parameters such as infectiousness, the longevity and the behaviour our statement remains one hypothesis and that is why in line 477, we are saying that it would be interesting to investigate this hypothesis through further studies. However, to avoid any confusion for the understanding of our statement, we rewrite the sentence at line 45 in the revised manuscript as followed: “This study suggests that P450-based metabolic resistance may influence the blood feeding process of *Anopheles funestus* mosquito and by consequence its ability to transmit malaria vectors and parasites.”

3. The data presented in Figure 4 are not clear what it is, and the variation shown (SEM? SD??) is not normal (or not well analysed and explained). If true, alternative ways could be considered to present this data.

Answer: We thanks the reviewer for this comment and we are totally agree with him that there is sometime wrong with this graphic. Indeed, since fold changes are not normally distributed data, there is no reason to represent them with standard errors. Moreover, these standards errors were not well estimated. After reanalysing these data we found that relative expression of each gene is the great way to present this result. Thus, since the trend of the result is the same, in the revised manuscript we replace the former figure 4 by a new one presenting the comparative relative expression of each between CYP6P9a-RR, CYP6P9a-RS and CYP6P9a-SS mosquitoes. Also, some few modifications were made in the part entitled “Expression profile of AAPP and D7 family salivary genes according to CYP6P9a-R genotypes” of the results section of the revised manuscript.

Reviewer #2:

Although the authors have done work that is reasonably methodologically sound, I am not fully convinced by the conclusions, rather than having a problem with the findings. The key problem is that the argument of the association of the genotype with behaviours is not strong enough. I will outline some of the key issues that need to be addressed to strengthen the argument enough to be published. The experiments are largely sound, but there needs to be a large scale restructuring of the discussion and the conclusions drawn, as the arguments are not strongly convincing.

Major comments:

There is a substantial body of work about the effects of metabolic resistance and life history. The novel factor of your work is that your work involved wild specimens, where previous studies on metabolic resistance and its effects were on laboratory strains where the resistance mechanisms were characterised. Although the metabolic screening tools are useful, this does not mean that studies on metabolic resistance could not happen before it. The success rate of genotyping of the wild specimens (78% success rate) is concerning. The substantial amount of unsuccessfully genotyped individuals could have altered the findings. This must be acknowledged.

Answer: We agree with the reviewer that our study is not the first one on metabolic resistance since some other studies were already done. However our study is among the most recent ones using a DNA based marker to investigate the physiological impact of metabolic resistance in *Anopheles* mosquitoes. Concerning the L119F-

GSTe2 genotyping, we agree with the reviewer that the number of unsuccessfully genotyped individuals is not negligible and could have altered our findings for this marker. This aspect was taken into account as it could be the source of low number of L119F-GSTe2-RR mosquitoes in this study. That is why in the first manuscript we have indicated that our findings for the L119F-GSTe2 mutation could have been biased by the low number of L119F-GSTe2-RR mosquitoes. However to be more understandable we added more comments in the revised manuscript (see lines 410 to 414). Nevertheless, since our analyses were performed on approximately 78% (360/457) of our total sample we think that this sample size was more than enough for this assessment.

The authors need to guide the readers a little more. There are times in the methods section where it is confusing as to why the methods were being employed, but this was clarified in the results section. It would make the MS easier to read if the reason for the methodology was introduced prior to the description of the method.

Answer: We thanks the reviewer for this suggestion. This remark have been taken into consideration and the methods section were rewritten in the revised manuscript to help the readers understanding why each method was employed in the study.

During the PCR methods section, it seems that the different sections were written by different people. In some parts it is satisfactory, and in others, it seems that the methods come from a dissertation. PCR methods in a manuscript include concentrations and not volumes, and these sections are more suited for a standard operating procedure than a manuscript. Centrifugation data must be reported in rcf (g) not rpm. Please ensure that the language of the molecular methods is appropriate.

Answer: All these remarks were taken into consideration. We have revised the PCR section in the revised manuscript and we replaced the volume of the reagents by the concentrations. We also converted the centrifugation data from rpm to rcf.

The weight of the *An. funestus* mosquitoes you describe is very high. In my experience mosquitoes weighing close to a milligram normally have wingspans of between 3.5 to 4mm, and these are very large *An. gambiae*. This result is therefore quite startling. It also leads to questions about the conclusions about genotype and size.

Answer: The observation of the review about the size of the weight of mosquitoes used in this study is understandable, since these mosquitoes look bigger than what usually reported. However, we think that there are important points to consider here before comparing the weight of our mosquitoes and those from previous studies. These points could certainly explained the huge differences between our study and other ones. For instance, instead of weighing dead and dried mosquitoes as commonly done in previous studies, mosquitoes used in our study were not killed and dried before being weighted. So mosquitoes' weight in our study is not a dried weight. This difference in the method used is important since there are numerous components that can influence mosquito's weight which are eliminated when mosquito is drying. Additionally, in our study we worked with mosquitoes of 3 to 7 days old whereas other previous studies mainly worked with mosquitoes of 1 day old maximum. This difference in age can also lead to the difference of the weight between two mosquitoes. One other important element that could explain the bigger weight of mosquitoes used in this study compared to other ones, is the fact that unlike of what done in previous studies, mosquitoes here were fed with sugar solution before being weighting after being starved during 24h. Overall, all these parameter could explained why our mosquitoes look bigger than usual. Furthermore, is important to noted that the weight our mosquitoes is not so different to what Roitberg and its colleagues obtained by weighting also fresh mosquitoes (Roitberg BD, Mondor EB, Tyerman JGA (2003) Pouncing spider, flying mosquito: blood acquisition increases predation risk in mosquitoes. *Behavioral Ecology*, Vol. 14 No. 5: 736–740, DOI: 10.1093/beheco/arg055). However, it could be interesting in further studies to assess the weight of *Anopheles funestus* mosquito when he is dried.

Furthermore, it is also concerning that you talk about size, and the relationship between genotype and size, without describing how you controlled for the larval diet. If this was not controlled for, then genotype may be related to larval feeding propensity that resulted in larger adults, which is a slightly different situation. It may also simply be that there was feeding variation between cohorts. Therefore, if you cannot describe how larval feeding was standardised, then conclusions about size cannot be made.

Answer: We completely agree with the reviewer that the mosquito's weight hardly depend of larval rearing and feeding condition. Larval diet strongly impact the weight of mosquitoes. But in the case of our study, the potential bias due to the larval rearing condition could not impact our findings. Indeed, at the larval stage, mosquitoes were

reared and fed in the same conditions since eggs laid by parent were put in the same trays regardless the genotypes. It's only at the adult stage and after the weighting and the blood-feeding that mosquitoes were genotyped and separated according to their genotypes. Before the genotyping mosquitoes at all stages were pooled and reared in the same conditions. This is one of the main advantage of using the molecular markers for such assessment since they help to reduce all the confounding factors which could impact the outcome of the study.

Something that also jumps out is that CYP6P9-SS adults are bigger. This is quite unusual, as larger mosquitoes tend to be more tolerant of insecticides, or that resistant phenotypes are associated with larger body sizes (eg: Osuwu et al: Sci Rep. 2017 Jun 16;7(1):3667, Jeanrenaud et al, PLoS One. 2019 Apr 18;14(4):e0215552). Such an unusual result must be discussed.

Answer: Thanks for this remark. We were also surprised by this result since we were expecting to observe the opposite pattern according to the fact that resistant phenotypes are often reported associated with larger body sizes. As suggested by the reviewer, this point is now discussed in the revised manuscript (See lines: 422-437).

Line 375-396: Impact of metabolic resistance on blood feeding success

This particular argument does not hold water. Firstly, you have just given the definition of an anautogenous mosquito. Secondly, you hypothesize that CYP6P9 could affect feeding because of teneral reserves. You have not examined this, and crucially, as have described above, you do not describe how feeding was controlled for and this is crucial for comments on size. Also, as I have described above, the mosquitoes you have described are extremely large for *An. funestus*, so I don't think poor teneral reserves can account for the findings you have described. Related to this, later there are discussions about resistance and blood feeding, hypothesising that the smaller resistant mosquito (which is unusual in itself) needs to take more blood because they have lower teneral reserves. This line of argument is not well supported as there was no evidence that food quantity was controlled, and therefore there cannot be arguments about teneral reserves. Teneral reserves are not only represented by size, and if there is an argument to made about this, there are simple calorimetric assays described in the MR4 manual to measure this. Finally, the fact that these mosquitoes seem to be very large for their species, it seems problematic to ascribe this behaviour to poor teneral reserves.

Answer: We well understand the concern highlighted by the reviewer. However, as we mentioned above, we have eliminated all potential bias related to feeding and rearing conditions since our mosquitoes were genotyped and sorted according their genotype only after blood-feeding experiments mosquitoes used in this study were reared in the same conditions. Indeed, larvae were pooled in the same tray, fed in the same conditions. After emergence, adult mosquitoes were in the same cages and were fed with the same sugar solution. It is only after all the experiments and genotyping that the link between body size and the genotype was assessed. However, although we have reduced the bias related to breeding conditions, it cannot be excluded that the weight of mosquitoes was influenced by the digestion of the sugar solution which could have been incomplete in some individuals. Other studies based on calorimetric analyses could probably allow a better comparison of the quantity of teneral reserves between resistant and susceptible mosquitoes. This aspect was pointed out and discussed in the revised manuscript.

Line 398-417 Impact of metabolic resistance on probing time and feeding duration  
Besides the comment that I have made on the document that it is not worth discussing results that are not statistically significant, there is another methodical flaw that is revealed in this discussion. By the authors' admission, there were not a large amount of resistant heterozygotes. Although crosses were performed to generate heterozygotes, if Fumoz was available for crossing, surely uncrossed Fumoz would have been a useful source of RR mosquitoes? Is there a reason why RR and SS individuals were not obtained for study from the original strains?

Answer: We thank the reviewer for the comment. Since our study aimed to assess the impact of metabolic resistance in important feeding parameters of *Anopheles funestus* mosquito, it was crucial to work with mosquitoes shearing the same genetic background. For this purpose we worked with Fumoz (full resistance) and FANG (full susceptible) strains. Since the genetic background of these two lab strain is huge different, we thought that it would not have been reasonable to work separately with RR (from Furmoz) and SS (from FANG). So to limit the impact of this genetic background differences the option chosen and which is recommended (Thiago Affonso Belinato and Ademir Jesus Martins (March 2nd 2016). Insecticide Resistance and



Fitness Cost, Insecticides Resistance, Stanislav Trdan, IntechOpen, DOI: 10.5772/61826. Available from: <https://www.intechopen.com/books/insecticides-resistance/insecticide-resistance-and-fitness-cost>), was to work with mosquitoes generated after crossing FANG and Fumoz. Working with individuals generated from crosses avoid our funding being influenced by other several genetic difference.

Line 418-450: Impact of metabolic resistance on blood meal volume  
There are some issues in this section.

Line 427-431. The authors describe that "the positive association CYP6P9a-R resistant allele and the volume of blood meal is a bit surprising knowing that activity of P450 monooxygenases as well as blood meal digestion, have been reported to generate an excess production of reactive oxygen species (ROS) increasing oxidative stress which could induce several damages in the mosquito's system that can result to death [38,39]. This is not really that surprising if you consider that the resistant An. funestus strains Fumoz and in particular Fumoz R has a marked capacity to cope with oxidative stress, both phenotypically and due to increased glutathione peroxidase and catalase activity (Oliver and Brooke PLoS One. 2016 Mar 10; 11(3):e0151049): Your reference cites information about oxidative stress in Aedes. There are better references, as there is work on oxidative stress in Anopheles, not only the previously mentioned which shows that oxidative stress in An. funestus specifically is quite different to Aedes. Champion and Xu (Sci Rep 8, 13054 (2018)) show the complexity of the interaction between oxidative stress, insecticide resistance and fecundity in An. gambiae. Crucially, what they show a relationship between oxidative stress and resistance, with resistant An. gambiae also has a greater oxidative stress capacity. Over and above this, epsilon class GSTs are associated with oxidative stress defence. In the selections, did these genotypes segregate separately (was this checked), because it will be difficult to discuss oxidative stress in relation to CYP6P9 (where P450s do increase oxidative stress) if the effect of the GSTe2 in the same individual has not been considered.

Answer: The point highlighted by the reviewer is very interesting and was taken into consideration. We really found interesting all papers mentioned by the reviewer, since they help us improving our discussion section in the revised manuscript. Nevertheless, We would like to precise that the effect of GSTe2 and P450s where not assessed on the same mosquitoes since the GSTe2, unlike to the duplicated CYP6P9a and b, is not implicated in resistance in FUMOZ strain. That is the reason why we used two different strains to assess the impact of metabolic resistance in An. funestus blood-feeding process: i) FUMOZ lab strain to assess the impact of CYP6P9a and ii) for the impact of GSTe2 we used the field collected mosquitoes from Cameroon where this gene where previously shown to be overexpressed in DDT and Permethrin resistant mosquitoes (Riveron JM, Yunta C, Ibrahim SS, Djouaka R, Irving H, et al. Genome Biology (2014)). Furthermore, we agree with the reviewer that it will be difficult to discuss oxidative stress in relation to CYP6P9 if the effect of the GSTe2 in the same individual has not been considered, since both enzyme have opposite effect. In our study we did not assess this point because as said above, among the two genes concerned in our study, only the CYP6P9a is reported over-expressed and evolved in insecticide resistance of FUMOZ-R strain. However, although GSTe2 is not over-expressed and evolved in insecticide resistance in Fumoz strain, I would have been interesting to measure its activity in CYP6P9a-RR mosquitoes before and after blood-feeding. This would have been more informative about the mechanism used by the CYP6P9a-RR mosquito to cope with the oxidative stress generated by the positive association between high blood meal volume and the CYP6P9a-R mutation. In the same vein, the assessment of the activity of other antioxidant agents would be helpful for the great understanding of the control of oxidative damage by CYP6P9a-RR mosquito after blood-feeding. All these points are now included in the discussion section in the revised manuscript.

Another major issue that I have with this argument has to do with the argument about fitness costs in An. funestus. Although your reference for this is a manuscript where fitness costs are noted, this manuscript examined it in crosses, as you have done in this experiment. However, that study and the present study ignore the work of Okoye et al (Bull Entomol Res. 2007 Dec; 97(6):599-605), which did not find a fitness cost to resistance in Fumoz. Their conclusion is supported by the fact that Fumoz-R maintains high deltamethrin resistance intensity without selection. Therefore, a fitness cost cannot be unambiguously assigned to the resistant funestus.

Answer: First of all, we would like to reassure the reviewer that our study did not ignore the work of Okoye et al. We did not referred to this previous work because the authors

used two strains of different genetic background to evaluate the fitness associated with resistance in Fumoz since they do not have a DNA-based marker. The main approach for such assessment is to cross the resistant and the susceptible strains so that the fitness cost will be evaluated on mosquitoes with the same genetic background. This is the approach used in this study and previously by Tchouakui et al 2020. However, since our findings appeared to show no reduction of the fitness of CYP6P9a-RR mosquitoes as previously observed by Okoye et al in phenotypically resistant FUMOZ strain, we have revised and restructured our discussion. In the revised manuscript we are now taking into account the fact that our findings seem to suggest that the CYP6P9a-based metabolic resistance might not probably compromise some life straits of Anopheles funestus mosquito, including its ability to have a blood meal and the volume of blood it is able to ingest. Because of these modification of the discussion of our results, the paper of Okoye et al, is now cited in the revised manuscript.

The studies on salivary gene expression are problematic. I assumed that there would not be a different as the error bars (if they are error bars and not standard deviation) are huge. This is concerning and this is not a good quality result for publication. Is there an explanation for this?

Answer: We thanks the reviewer for this comment. As already said above, there was sometime wrong with this graphic. Indeed, since fold changes are not normally distributed data, there is no reason to represent them with standard errors. Moreover, these standards errors were not well estimated. After reanalysing these data we found that relative expression of each gene is the great way to present this result. Thus, since the trend of the result is the same, in the revised manuscript we replace the former figure 4 by a new one presenting the comparative relative expression of each between CYP6P9a-RR, CYP6P9a-RS and CYP6P9a-SS mosquitoes. Also, some few modifications were made in the part entitled "Expression profile of AAPP and D7 family salivary genes according to CYP6P9a-R genotypes" of the results section of the revised manuscript

Minor comments

Throughout the document: change homo or heterozygote to heterozygous where it is used as an adjective rather than a noun.

Thanks to the reviewer, homo or heterozygote has been changed to heterozygous thought out the manuscript

There are numerous small comments annotated on the manuscript that must be addressed.

Thanks a lot for all the attention on the manuscript all the comments have been addressed as you can see in the revised version

How was RNA quality assessed?

Answer: This was mainly evaluated based on the ratio obtained from Nanodrop with ratio ranged from 1.8 - 2.0. Using the bioanalyzer could have been the best option for that, but; unfortunately this expensive equipment is not yet available in our lab.

I do not think that actin was the best choice of housekeeping gene for a study about a blood feeding response. Actin would not stay stable during blood feeding as the abdominal expansion associated with blood feeding would alter actin expression.

Answer: Actin has been used for many studies on the expression profiling of insecticide resistance genes in An. funestus. Probably, the abdominal expansion associated with blood feeding can alter actin expression as mentioned the reviewer but in our study we assessed genes expression in the salivary glands. Nevertheless this has to be taken into account for further studies on this aspect.

Line 291: This is quite unusual. The laboratory strains would have fed quite well if they were allowed to feed for 30 minutes. How old were these mosquitoes when they were fed? Over and above the parameters I described before, it may be that the mosquitoes did not feed well, as 3 days is not the optimal feeding age for An. funestus.

Answer: The mosquitoes used for the experiments aged between 3-7 days old.

Probably 3 days is not the optimal feeding age for An. funestus but all the mosquitoes did not have 3 days. Also this cannot impact the outcome of the association between the markers and the feeding since the age cannot affect only one of the three genotypes given that mosquitoes were reared, fed and kept together.

Did the mean amount of blood taken in the GST genotype differ significantly from the CYP6 genotype?

Yes a significant difference was found between GST and CYP6, with mosquitoes displaying low mean blood meal volume for GSTs ( $P < 0.0001$ ). However, since our aims was to compare these two mosquitos' strains, we did not include this analysis in

|                                                                                                                                                                                                                                                                                                                                                                                                                                                                                                                                                                                                                                                                                                                                                                                                                                                                                                                                                                                                                                                                                                                                                                                                                                                                                                                                                                                     |                                                                                                                                                                                                                                                                                                                                                                                                                                                                                                                                                                                                                                                                                                                                                                                                                                                        |
|-------------------------------------------------------------------------------------------------------------------------------------------------------------------------------------------------------------------------------------------------------------------------------------------------------------------------------------------------------------------------------------------------------------------------------------------------------------------------------------------------------------------------------------------------------------------------------------------------------------------------------------------------------------------------------------------------------------------------------------------------------------------------------------------------------------------------------------------------------------------------------------------------------------------------------------------------------------------------------------------------------------------------------------------------------------------------------------------------------------------------------------------------------------------------------------------------------------------------------------------------------------------------------------------------------------------------------------------------------------------------------------|--------------------------------------------------------------------------------------------------------------------------------------------------------------------------------------------------------------------------------------------------------------------------------------------------------------------------------------------------------------------------------------------------------------------------------------------------------------------------------------------------------------------------------------------------------------------------------------------------------------------------------------------------------------------------------------------------------------------------------------------------------------------------------------------------------------------------------------------------------|
|                                                                                                                                                                                                                                                                                                                                                                                                                                                                                                                                                                                                                                                                                                                                                                                                                                                                                                                                                                                                                                                                                                                                                                                                                                                                                                                                                                                     | <p>our manuscript. Also, we thought that this analyse might have been biased by the fact that one type of mosquito was lab strain (CYP6P9a-mosquitoes) which is most able to take it blood meal in lab condition than field collected (GSTe2 mosquitoes) field.</p> <p>Line 368: This is not true. There is a body of work that describes the interplay between metabolic resistance and longevity and stress response, among others. It is not as well examined as target site resistance, but there is a body of work on the subject. If the statement was amended to say that this is so for wild specimens, that is true because the studies were primarily studied in lab strains where the metabolic resistance profile had been defined.</p> <p>This comment was take into consideration and Line 368 was removed in the revised manuscript</p> |
| <p><b>Additional Information:</b></p>                                                                                                                                                                                                                                                                                                                                                                                                                                                                                                                                                                                                                                                                                                                                                                                                                                                                                                                                                                                                                                                                                                                                                                                                                                                                                                                                               |                                                                                                                                                                                                                                                                                                                                                                                                                                                                                                                                                                                                                                                                                                                                                                                                                                                        |
| <p><b>Question</b></p>                                                                                                                                                                                                                                                                                                                                                                                                                                                                                                                                                                                                                                                                                                                                                                                                                                                                                                                                                                                                                                                                                                                                                                                                                                                                                                                                                              | <p><b>Response</b></p>                                                                                                                                                                                                                                                                                                                                                                                                                                                                                                                                                                                                                                                                                                                                                                                                                                 |
| <p><b>Financial Disclosure</b></p> <p>Enter a financial disclosure statement that describes the sources of funding for the work included in this submission. Review the <a href="#">submission guidelines</a> for detailed requirements. View published research articles from <a href="#">PLOS ONE</a> for specific examples.</p> <p>This statement is required for submission and <b>will appear in the published article</b> if the submission is accepted. Please make sure it is accurate.</p> <p><b>Unfunded studies</b><br/>Enter: <i>The author(s) received no specific funding for this work.</i></p> <p><b>Funded studies</b><br/>Enter a statement with the following details:</p> <ul style="list-style-type: none"> <li>• Initials of the authors who received each award</li> <li>• Grant numbers awarded to each author</li> <li>• The full name of each funder</li> <li>• URL of each funder website</li> <li>• Did the sponsors or funders play any role in the study design, data collection and analysis, decision to publish, or preparation of the manuscript?</li> <li>• <b>NO</b> - Include this sentence at the end of your statement: <i>The funders had no role in study design, data collection and analysis, decision to publish, or preparation of the manuscript.</i></li> <li>• <b>YES</b> - Specify the role(s) played.</li> </ul> <p>* typeset</p> | <p>The funders had no role in study design, data collection and analysis, decision to publish, or preparation of the manuscript</p>                                                                                                                                                                                                                                                                                                                                                                                                                                                                                                                                                                                                                                                                                                                    |
| <p><b>Competing Interests</b></p>                                                                                                                                                                                                                                                                                                                                                                                                                                                                                                                                                                                                                                                                                                                                                                                                                                                                                                                                                                                                                                                                                                                                                                                                                                                                                                                                                   | <p>The authors have declared that no competing interests exist.</p>                                                                                                                                                                                                                                                                                                                                                                                                                                                                                                                                                                                                                                                                                                                                                                                    |



Use the instructions below to enter a competing interest statement for this submission. On behalf of all authors, disclose any [competing interests](#) that could be perceived to bias this work—acknowledging all financial support and any other relevant financial or non-financial competing interests.

This statement **will appear in the published article** if the submission is accepted. Please make sure it is accurate. View published research articles from [PLOS ONE](#) for specific examples.

#### **NO authors have competing interests**

Enter: *The authors have declared that no competing interests exist.*

#### **Authors with competing interests**

Enter competing interest details beginning with this statement:

*I have read the journal's policy and the authors of this manuscript have the following competing interests: [insert competing interests here]*

\* typeset

#### **Ethics Statement**

Enter an ethics statement for this submission. This statement is required if the study involved:

- Human participants
- Human specimens or tissue
- Vertebrate animals or cephalopods
- Vertebrate embryos or tissues
- Field research

Write "N/A" if the submission does not require an ethics statement.

General guidance is provided below. Consult the [submission guidelines](#) for detailed instructions. **Make sure that all**

Following to the protocol for which we obtained an ethical clearance was delivered to us by the Cameroonian national ethical committee, human volunteer was recruited among technicians working at the insectary of CRID and who by consequence are frequently exposed to mosquitoes. An informed consent was obtained after explanation of the purpose of the study.

information entered here is included in the Methods section of the manuscript.

**Format for specific study types**

**Human Subject Research (involving human participants and/or tissue)**

- Give the name of the institutional review board or ethics committee that approved the study
- Include the approval number and/or a statement indicating approval of this research
- Indicate the form of consent obtained (written/oral) or the reason that consent was not obtained (e.g. the data were analyzed anonymously)

**Animal Research (involving vertebrate animals, embryos or tissues)**

- Provide the name of the Institutional Animal Care and Use Committee (IACUC) or other relevant ethics board that reviewed the study protocol, and indicate whether they approved this research or granted a formal waiver of ethical approval
- Include an approval number if one was obtained
- If the study involved *non-human primates*, add *additional details* about animal welfare and steps taken to ameliorate suffering
- If anesthesia, euthanasia, or any kind of animal sacrifice is part of the study, include briefly which substances and/or methods were applied

**Field Research**

Include the following details if this study involves the collection of plant, animal, or other materials from a natural setting:

- Field permit number
- Name of the institution or relevant body that granted permission

**Data Availability**

Authors are required to make all data underlying the findings described fully available, without restriction, and from the time of publication. PLOS allows rare exceptions to address legal and ethical

Yes - all data are fully available without restriction

concerns. See the [PLOS Data Policy](#) and [FAQ](#) for detailed information.

A Data Availability Statement describing where the data can be found is required at submission. Your answers to this question constitute the Data Availability Statement and **will be published in the article**, if accepted.

**Important:** Stating 'data available on request from the author' is not sufficient. If your data are only available upon request, select 'No' for the first question and explain your exceptional situation in the text box.

Do the authors confirm that all data underlying the findings described in their manuscript are fully available without restriction?

**Describe where the data may be found in full sentences. If you are copying our sample text, replace any instances of XXX with the appropriate details.**

- If the data are **held or will be held in a public repository**, include URLs, accession numbers or DOIs. If this information will only be available after acceptance, indicate this by ticking the box below. For example: *All XXX files are available from the XXX database (accession number(s) XXX, XXX).*
- If the data are all contained **within the manuscript and/or Supporting Information files**, enter the following:  
*All relevant data are within the manuscript and its Supporting Information files.*
- If neither of these applies but you are able to provide **details of access elsewhere**, with or without limitations, please do so. For example:

*Data cannot be shared publicly because of [XXX]. Data are available from the XXX Institutional Data Access / Ethics Committee (contact via XXX) for researchers who meet the criteria for access to confidential data.*

All relevant data are within the manuscript.

|                                                                                                                                                                                                                                                                                                                                                        |  |
|--------------------------------------------------------------------------------------------------------------------------------------------------------------------------------------------------------------------------------------------------------------------------------------------------------------------------------------------------------|--|
| <p><i>The data underlying the results presented in the study are available from (include the name of the third party and contact information or URL).</i></p> <ul style="list-style-type: none"><li>• This text is appropriate if the data are owned by a third party and authors do not have permission to share the data.</li></ul> <p>* typeset</p> |  |
| Additional data availability information:                                                                                                                                                                                                                                                                                                              |  |

1 **Influence of GST- and P450-based metabolic resistance to**  
2 **pyrethroids on blood feeding in the major African malaria**  
3 **vector *Anopheles funestus***

4  
5 Lynda NOUAGE<sup>1,2</sup>✚\*, Emmanuel ELANGA-NDILLE<sup>1</sup>✚\*, Achille BINYANG<sup>1,2</sup>, Magellan  
6 TCHOUAKUI<sup>1,2</sup>, Tatiane ATSATSE<sup>1,2</sup>, Cyrille NDO<sup>3, 4</sup>, Sévilor KEKEUNOU<sup>2</sup>, Charles S.  
7 WONDJI<sup>1,5</sup>

8  
9 <sup>1</sup>Departement of Medical Entomology, Centre for Research in Infectious Diseases (CRID) P.O.  
10 BOX 13591, Yaoundé, Cameroon

11 <sup>2</sup>Department of Animal Biology and Physiology, Faculty of Science, University of Yaoundé 1,  
12 P.O. Box 812, Yaoundé, Cameroon

13 <sup>3</sup>Departement of Parasitology and Microbiology, Centre for Research in Infectious Diseases  
14 (CRID) P.O. BOX 13591, Yaoundé, Cameroon

15 <sup>4</sup>Department of Biological Sciences, Faculty of Medicine and Pharmaceutical Sciences,  
16 University of Douala, P.O. Box 24157, Douala, Cameroon.

17 <sup>5</sup>Department of Vector Biology, Liverpool School of Tropical Medicine, Pembroke Place,  
18 Liverpool L3 5QA, UK

19

20 ✚: These authors contributed equally to this work

21 \*: Corresponding authors: Emmanuel ELANGA-NDILLE ([emmsdille@yahoo.fr](mailto:emmsdille@yahoo.fr);  
22 [emmanuel.elanga@crid-cam.net](mailto:emmanuel.elanga@crid-cam.net)) and Lynda NOUAGE ([lnouage@gmail.com](mailto:lnouage@gmail.com))

23

24

25

26



## 27 **Abstract**

28 Insecticide resistance genes are often associated with pleiotropic effects on various mosquito  
29 life-history traits. However, very little information is available on the impact of insecticide  
30 resistance on blood feeding process in mosquitoes. Here, using two recently detected DNA-  
31 based metabolic markers in the major malaria vector, *An. funestus*, we investigated how  
32 metabolic resistance genes could affect the blood meal intake. After allowing both the field F1  
33 and lab F8 *Anopheles funestus* strains to feed on the human arm for 30 minutes, we assessed  
34 the association between key parameters of blood meal process including, probing time, feeding  
35 duration, blood feeding success, blood meal size, and markers of glutathione S-transferase  
36 (*L119F-GSTe2*) and cytochrome P450 (*CYP6P9a\_R*) - mediated metabolic resistance. None of  
37 the parameters of blood meal process was associated with *L119F-GSTe2* genotypes. By  
38 contrast, for *CYP6P9a\_R*, homozygous resistant mosquitoes were significantly more able to  
39 blood-feed than homozygous susceptible (OR = 3.3; CI 95%: 1.4-7.7; P =0.01) mosquitoes.  
40 Moreover, the volume of blood meal ingested by *CYP6P9a*-SS mosquitoes was lower than that  
41 of *CYP6P9a*-RS (P<0.004) and of *CYP6P9a*-RR (P<0.006). This suggests that *CYP6P9a* genes  
42 linked with the feeding success and blood meal size of *An. funestus*. However, no correlation  
43 was found in the expression of *CYP6P9a* and that of genes encoding for salivary proteins  
44 involved in blood meal process.

45 This study suggests that P450-based metabolic resistance may influence the blood  
46 feeding process of *Anopheles funestus* mosquito and consequently its ability to transmit  
47 malaria parasites.

48 **Keywords:** Malaria, Mosquito, *Anopheles funestus*, Insecticide resistance, Metabolic  
49 resistance, GST, P450, Blood meal intake

50

## 51 **Introduction**

52 Malaria remains a major public health scourge in sub-Saharan Africa despite significant  
53 progress made since the 2000s in reducing its burden [1]. This disease is caused by a  
54 *Plasmodium* parasite transmitted by *Anopheles* mosquito species while taking a blood meal  
55 from humans. Blood feeding is essential for female mosquito's fecundity [2] as *Anopheles*  
56 species like all anautogenous female mosquitoes, require a blood meal to obtain amino acids  
57 needed to synthesize yolk proteins for eggs maturation [3,4]. The blood feeding success of  
58 mosquitoes is facilitated by the biochemical properties of salivary gland proteins [5]. Indeed,  
59 some salivary proteins such as anopheline antiplatelet protein (AAPP), apyrase, gambiae  
60 Salivary Gland protein 6 (gSG6) and members of D7 family have been identified as  
61 vasodilators, anti-coagulants and inhibitors of platelet aggregation allowing mosquitoes to  
62 overcome host haemostatic mechanisms and to have a successful blood meal [5-8]. Mosquito  
63 fecundity was shown to vary by source and size of the blood meal with a difference of these  
64 two parameters resulting in significant variations of the number of eggs laid by each female  
65 mosquito [4,8]. It has been shown that the number of eggs laid per female is positively  
66 associated to the amount of blood ingested as larger blood meals resulted in an increase of the  
67 number of females that developed eggs and the number of eggs per female [9,10]. The volume  
68 of blood taken by a mosquito could be affected by a range of intrinsic (host immunity) and  
69 extrinsic factors including ambient temperatures, mosquito age, parity status, gonotrophic  
70 cycle, blood feeding history and infection status [10]. More recently, it was reported that  
71 exposure to pyrethroids could also significantly influence the blood meal the process of taking  
72 a blood meal and the blood meal volume ingested by Kdr-resistant *Anopheles gambiae* females  
73 [11]. Pyrethroids (PY) are the insecticide class mostly used in the last two decades through  
74 ITNs and IRS strategies to control malaria transmission [12]. Unfortunately, the widespread  
75 use of these insecticides has favoured the development of resistance in malaria vector species

76 [13,14]. Resistance to pyrethroids involves two main mechanisms: (i) metabolic resistance, due  
77 to the increase expression level of detoxifying enzymes, belonging to three families: the  
78 cytochrome P450 monooxygenases, the glutathione S-transferases and the carboxylesterases;  
79 and (ii) target-site resistance due to mutations in the voltage sodium channels known as knock-  
80 down (*kdr*) mutations [15,16]. Although resistance mechanisms help mosquitoes to survive  
81 under continuous insecticide pressure, these actions are costly and may negatively affect  
82 mosquito's fitness including body size, adult longevity, larval development time, fecundity,  
83 fertility, mating competitiveness and blood feeding capability [17-19]. For target-site  
84 resistance, a decreased longevity and an increased larval development time have been reported  
85 in *kdr*-pyrethroid-resistant mosquitoes [20,21]. Moreover, a recent study suggested that *kdr*-  
86 based resistance could impact blood feeding with heterozygote (*kdr*-RS) and susceptible (*kdr*-  
87 SS) mosquitoes taking higher blood volume than homozygote (*kdr*-RR) resistant individuals  
88 [11]. In some cases, resistant mosquitoes displayed a significant advantage compared to their  
89 susceptible counterparts as shown recently for female longevity [22] and vectorial capacity  
90 [23]. However, little is known on the impact of metabolic resistance as DNA-based markers  
91 were not previously available for this mechanism; thereby limiting the ability to investigate its  
92 physiological impact on the blood feeding process in mosquitoes. However, taking advantage  
93 of the identification of the first DNA-based metabolic marker in *An. funestus* mosquito, one  
94 study reported that a GST-based metabolic resistance caused by a leucine to phenylalanine  
95 amino acid change at codon 119 in the glutathione S-transferase epsilon 2 (*L119F-GSTe2*) [24],  
96 has a detrimental impact on *An. funestus* fitness. The authors reported that field-resistant  
97 mosquitoes exhibited a reduced fecundity and slower larval development but an increased adult  
98 longevity [22]. On the other hand, a new DNA-based assay was recently designed for  
99 cytochrome P450-mediated resistance (the *CYP6P9a*-R) in *An. funestus*. This marker showed  
100 that mosquitoes carrying this P450-resistant allele survived and succeeded in blood feeding

101 more often than did susceptible mosquitoes when exposed to insecticide-treated nets [25]. The  
102 design of assays for both GST- and P450-based resistance now offers a great opportunity to  
103 explore how the blood feeding process is influenced by metabolic resistance mechanism in  
104 malaria vectors and further assess how resistance may impact the vectorial capacity of  
105 mosquitoes to transmit malaria in the natural environment.

106 Here, we investigated the effect of metabolic resistance to pyrethroids on the blood feeding  
107 process in *An. funestus*, using the two DNA-based metabolic resistance markers: *L119F-GSTe2*  
108 and *CYP6P9a-R* [24,25]. Specifically, we assessed the association between the genotypes of  
109 these metabolic resistance markers and key parameters of blood feeding including mosquito  
110 probing time, feeding duration and the blood meal size.

111

## 112 **Material and Methods**

### 113 **Mosquito collection and rearing**

114 Experiments were carried out using both field and lab strains of *An. funestus*. Field  
115 mosquitoes (F<sub>1</sub>) were generated from indoor resting female (F<sub>0</sub>) collected in Mibellon (6°46'N,  
116 11° 70'E), a village located in a rural area of the savanna-forest region in Cameroon, Central  
117 Africa where the *L119F-GSTe2* has been reported [26]. Blood-fed field collected females were  
118 kept in paper cups and transported to the insectary of the Centre for Research in Infectious  
119 Diseases (CRID) in Yaoundé where they were kept for 4–5 days until they became fully gravid  
120 and were then induced to lay eggs using the forced eggs-laying method [27]. The eggs were  
121 placed in paper cups containing water to hatch, after which the larvae were transferred in to  
122 trays and reared to adults. To assess the effect of *CYP6P9a* marker, F<sub>8</sub> progenies were generated  
123 from crosses established between the pyrethroid susceptible laboratory strain (FANG) and the  
124 resistant (FUMOZ-R) lab strain. These two *An. funestus* lab strains were colonized from

125 mosquitoes collected in Southern Africa region. FUMOZ is a pyrethroid resistant strain  
126 established in the insectary from wild-caught *An. funestus* mosquito species from southern  
127 Mozambique [28]. The previous study reported that the over-expression of two duplicated P450  
128 genes, *CYP6P9a* and *CYP6P9b*, constitute the main mechanism driving pyrethroid resistance  
129 in this strain [29,30] for which the *119F-GSTe2* allele is absent [24]. The FANG strain is  
130 completely susceptible to pyrethroids colonized from Calueque in southern Angola [28].

131

## 132 **Blood feeding experiments and blood meal size quantification**

### 133 **Blood feeding process**

134 Since blood meal volume has previously been reported to correlate with mosquito size  
135 [2], individuals used for blood feeding experiments were firstly starved for 24h then grouped  
136 according to their size. Mosquito size was determined by weighing (using an analytical micro-  
137 scale, SARTORIUS, Goettingen, Germany). Each starved individual (adult females aged 3-7  
138 days) was immobilized by chilling for 2 minutes at 5°C. Each mosquito was then placed in  
139 paper cups covered with black sheet for about an hour before given a blood meal. In order to  
140 evaluate the association between metabolic resistant markers on blood meal size, mosquitoes  
141 were allowed to bite for 30 min on the bare forearm of a single human volunteer and then  
142 genotyped for L119F-GSTe2 and CYP6P9a. Following to the protocol for which we obtained  
143 an ethical clearance was delivered to us by the Cameroonian national ethical committee, human  
144 volunteer was recruited among technicians working at the insectary of CRID and who by  
145 consequence are frequently exposed to mosquitoes. An informed consent was obtained after  
146 explanation of the purpose of the study.

147 The duration of probing and blood feeding was assessed using a batch of 120 F<sub>1</sub> female  
148 field-collected mosquitoes. For this purpose, mosquitoes were individually transferred in  
149 polystyrene plastic cups covered with netting. They were allowed to rest for 15 min before



150 observations began. During the blood intake, each mosquito was filmed with a Digital HD  
151 Video Camera (Canon PC2154, Canon INC, Japan) placed beside the plastic cup. At the end of  
152 the time allowed for feeding, the film for each mosquito was analysed and the parameters such  
153 as probing time (defined as the time taken from initial insertion of the mouthparts in the skin  
154 until the initial engorgement of blood) [5] and total feeding duration, were recorded, using a  
155 digital timer. Due to the low density of female mosquitoes obtained at F<sub>8</sub> generation from  
156 crosses of the lab strain mosquitoes, experiments to estimate the probing and the feeding  
157 duration of this strain were not investigated.

158         To determine the blood meal size for both strains, batches of 25 mosquitoes grouped  
159 according to their weight were allowed to bite on a human arm. In this case, neither the probing  
160 time nor the feeding duration was recorded. After the trial, the whole abdomen of successfully  
161 fed mosquitoes (evident by red-coloration engorgement of the abdomen) was extracted and  
162 stored in an individual 1.5 ml microtube at – 20°C to measure the blood meal size. The rest of  
163 the carcasses as well as unfed mosquitoes were kept individually in a microtube containing  
164 RNA-later and stored at -20°C.

165

166

## 167 **Blood meal size quantification**

168         To compare the volume of blood ingested between resistant and susceptible mosquitoes,  
169 the volume of blood ingested by each mosquito was determined by quantifying the  
170 haemoglobin amount, as previously described [31]. Briefly, abdomens of blood fed mosquitoes  
171 were homogenized in 0.5 ml of Drabkin's reagent (containing 1.0g of sodium bicarbonate, 0.1g  
172 potassium carbonate, 0.05g potassium cyanide, 0.2g potassium ferricyanide all diluted in 1L of  
173 distilled water). This reagents converts the haemoglobin into haemoglobin cyanide (HiCN).

174 After 20 minutes at room temperature and the addition of 0.5 ml of chloroform solution,  
175 samples were centrifuged at 5600 rpm (3512 rcf) for 5 min. The aqueous supernatant containing  
176 HiCN was transferred in a new 1.5 ml microtube. An aliquot of 200µl from each sample was  
177 transferred to a microplate and the optical density (OD) read at a wavelength of 620nm in a  
178 spectrophotometer (EZ Read 400, biochrom, Cambridge, UK). OD for each sample were read  
179 in duplicate and the average value between the two replicates was considered as OD value of  
180 the sample. In parallel, OD read on various amounts of human volunteer blood added to  
181 Drabkin's reagent in individual microtubes were used as control to generate calibration curves  
182 and the regression line used to assess the relationship between OD and blood volume. For each  
183 sample, the blood meal size was estimated according to the weight by dividing the blood volume  
184 estimated using the regression line by the average weigh of each batch of mosquitoes  
185 constituted after the weighing. The blood meal size was then expressed in µL of blood per mg  
186 of weight.

187

188

## 189 **Molecular species identification**

190 To determine the species composition of *An. funestus* group among the samples,  
191 genomic DNA (gDNA) was extracted from both blood-fed and unfed mosquitoes using the  
192 Livak protocol [32]. Instead of using the whole body as done for unfed mosquitoes, DNA was  
193 extracted from the carcasses of fed mosquitoes after removing the abdomen for blood volume  
194 quantification. The concentration and purity of the extracted gDNA were subsequently  
195 determined using a NanoDrop™ spectrophotometer (Thermo Scientific, Wilmington, USA)  
196 before storage at -20 °C. An aliquot of gDNA extracted from field-collected strain was used  
197 for molecular identification by a polymerase chain reaction [33].

198

## 219 **Genotyping of *L119F-GSTe2* mutation in field-collected strain**

200 The *L119F-GSTe2* mutation was genotyped using gDNA extracted from carcasses of  
201 field-collected strains following an allele specific PCR diagnostic assay previously described  
202 [22]. The primers sequences are given in table S1. PCR was performed in Gene Touch thermal  
203 cycler (Model TC-E-48DA, Hangzhou, 310053, China), in a reaction volume of 15 µl using  
204 10 µM of each primer, 10X Kapa Taq buffer A, 0.2 mM dNTPs, 1.5 mM MgCl<sub>2</sub>, 1U Kapa Taq  
205 (Kapa Biosystems, Wilmington, MA, USA) and 1µl of genomic DNA as template. The cycle  
206 parameters were: 1 cycle at 95 °C for 2 min; 30 cycles of 94 °C for 30 s, 58 °C for 30 s, 72 °C  
207 for 1 min and then a final extension at 72 °C for 10 min. The PCR products were size separated  
208 on a 2 % agarose gel stained with Midori Green Advance DNA Stain (Nippon genetics Europe  
209 GmbH) and visualised using a gel imaging system. The size of the diagnostic band was 523 bp  
210 for homozygous resistant (RR) and 312 bp for homozygous susceptible (SS), while  
211 heterozygous (RS) showed the two bands.

212

## 213 **Genotyping of *CYP6P9a-R* allele in lab strain mosquitoes**

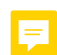

214 The *CYP6P9a* resistance marker was genotyped using the protocol recently designed by  
215 [25]. A PCR-RFLP were carried out using gDNA extracted from the carcasses of F<sub>8</sub> generation  
216 individuals obtained from the reciprocal crosses between FANG and FUMOZ strains used for  
217 blood feeding. Briefly, a partial *CYP6P9a* upstream region was amplified in a final volume of  
218 15µl PCR mixture containing 10X Kapa Taq buffer A (Kapa Biosystems, Wilmington, MA,  
219 USA), 5 U/µl KAPA taq, 25µM dNTP, 25µM MgCl<sub>2</sub>, 10 mM of each primer, 10.49µl of dH<sub>2</sub>O  
220 and 1µl of genomic DNA. The PCR cycle parameters were as follows: the initial denaturation  
221 step at 95°C for 5 minutes followed by 35 cycles of 94°C for 30 seconds, 58°C for 30 seconds

222 and 72°C for 45 seconds and a final extension step of 72°C for 10 minutes. The PCR products  
223 were size separated on a 1.5 % agarose gel stained with Midori Green Advance DNA Stain  
224 (Nippon genetics Europe GmbH) and visualised using a gel imaging system to confirm the  
225 product size (450bp). Then, the PCR product was incubated at 65°C for 2 hours. This was done  
226 in 0.2ml PCR strip tubes using 5µl of PCR product, 1µl of cutSmart buffer, 0.2µl of 2 units of  
227 Taq1 enzyme (New England Biolabs, catalog: ER0672) and 3.8µl of dH2O. Size separation was  
228 done on a 2.0% agarose gel stained with Midori Green Advance DNA Stain at 100V for 30  
229 minutes. The gel was visualised using the gel imaging system.

230

## 231 **Gene expression profiling of major salivary genes encoding** 232 **proteins involved in blood meal process.**

233 The expression profiles of a set of salivary genes encoding for proteins involved in blood  
234 meal process was compared between CYP6P9a-RR, CYP6P9a-RS and CYP6P9a-SS *An.*  
235 *funestus* mosquitoes. For each gene, two pairs of exon-spanning primers was designed for each  
236 gene using Primer3 online software (v4.0.0; <http://bioinfo.ut.ee/primer3/>) and only primers with  
237 PCR efficiency between 90 and 110% determined using a cDNA dilution series obtained from  
238 a single sample, were used for qPCR analysis. Taking into account this criteria of efficiency,  
239 only the AAPP and four members of D7 family genes (D7r1, D7r2, D7r3, and D7r4) were used  
240 for this analysis. Primers are listed in Table S1. Total RNA was extracted from three batches of  
241 10 whole females of 3–5 days old from CYP6P9a-RR, CYP6P9a-RS and CYP6P9a-SS  
242 mosquitoes. RNA was isolated using the RNAeasy Mini kit (Qiagen) according to the  
243 manufacturer's instructions. The RNA quantity was assessed using a NanoDrop ND1000  
244 spectrophotometer (Thermo Fisher) and 1µg from each of the three biological replicates for  
245 each batch of mosquitoes was used as a template for cDNA synthesis using the SuperScript III

246 (Invitrogen, Waltham, Massachusetts, USA ) with oligo-dT20 and RNase H, following the  
247 manufacturer's instructions. The qPCR assays were carried out in a MX 3005 real-time PCR  
248 system (Agilent, Santa Clara, CA 95051, United States) using Brilliant III Ultra-Fast SYBR  
249 Green qPCR Master Mix (Agilent). A total of 10 ng of cDNA from each sample was used as  
250 template in a three-step program involving a denaturation at 95 °C for 3 min followed by 40  
251 cycles of 10 s at 95 °C and 10 s at 60 °C and a last step of 1 min at 95 °C, 30 s at 55 °C, and 30  
252 s at 95 °C. The relative expression and fold-change of each target gene in CYP6P9a-RR and  
253 CYP6P9a-RS relative to CYP6P9a-SS was calculated according to the  $2^{-\Delta\Delta CT}$  method  
254 incorporating PCR efficiency after normalization with the housekeeping RSP7 ribosomal  
255 protein S7 (VectorBase ID: AFUN007153;) and the actin 5C (vectorBase ID: AFUN006819)  
256 genes for *An. funestus*.

257

## 258 **Statistical analysis**

259 All analyses were conducted using GraphPad Prism version 7.00 software. We  
260 estimated a Fisher's exact probability test and the odds-ratio of *L119F-GSTe2* and *CYP6P9a*  
261 genotypes (homozygous resistant = RR, heterozygote resistant=RS and homozygous resistant  
262 =SS) and both susceptible (S) and resistant (R) alleles. This allowed to the assessment of  
263 association between: a) insecticide resistance and mosquito's weight by comparing the  
264 proportions of the genotypes of both genes in each group established after weighing; b) blood  
265 feeding success and insecticide resistance by comparing the proportion of each genotype in  
266 both fed and unfed mosquitoes. The feeding duration was grouped into four intervals with 1  
267 minute (60s) amplitude for each interval. The duration of probing and feeding was analysed by  
268 comparing the proportion of mosquitoes (for *L119F-GSTe2* and *CYP6P9a*) with different  
269 genotypes in each defined intervals using chi-square test. After estimating the median of  
270 weighted blood meal for each genotype, Kruskal-Wallis and Mann-Whitney tests were used to



271 compare the differences between more than two groups and between two groups, respectively  
272 as Shapiro weich test showed non normal distribution.

273

## 274 **Results**

### 275 **Metabolic resistance genes and *An. funestus* mosquito's weight**

276 A total of 1,200 and 273 female mosquitoes were weighed, respectively for field strain  
277 (F<sub>1</sub> generation) and lab strain (F<sub>8</sub> generation). The mean weight of a mosquito was  $0.9 \pm 0.010$   
278 mg (minimum = 0.2 mg; maximum = 2.3mg) and  $0.89 \pm 0.016$  mg (minimum = 0.2 mg;  
279 maximum = 1.7mg) for field and lab strain respectively. No significant difference was found  
280 between the mean weights of two strain. For all the analyses, we arbitrarily grouped  
281 mosquitoes according to their weight values, into two different classes as followed: [0 - 1.0]  
282 mg and [1.1 - 2.3] mg. Analysis of the distribution of *L119F-GSTe2* mutation genotypes in each  
283 class of field strain mosquitoes showed no association between the mosquito's weight and  
284 *L119F-GSTe2* genotypes ( $\chi^2 = 0.15$ ;  $p = 0.9$ ; OR =1.2, 95%CI: 0.3742 - 4.176, for RR vs RS;  
285 OR=1.1, 95%CI: 0.3659 - 3.606 for RR vs SS; OR = 0.9, 95%CI: 0.4943 - 1.709 for RS vs SS)  
286 (Figure 1 and Table 1). This absence of correlation between the *L119F-GSTe2* genotypes and  
287 the weight of mosquitoes was confirmed at the allele level (OR=1; 95%: CI: 0.5–2.0;  $p =0.5$ )  
288 showing that the L119F mutation may not associated with the weight of this *An. funestus* field  
289 population (Table 1). In contrast, a significant association was observed between *CYP6P9a*  
290 genotypes and the weight of mosquito ( $\chi^2= 29.54$ ,  $p<0.0001$ ). Indeed, proportions of RR and  
291 RS genotypes were higher than that of SS in the lowest weight class, whereas, for larger weight,  
292 mosquitoes with SS genotype were more abundant (67.2%). This association is further  
293 supported by odds ratio estimates showing that proportions of homozygote resistant (RR)  
294 (OR=5.4; CI 95%: 2.3-12.7;  $p<0.0001$ ) and heterozygote (RS) (OR=5.6; CI 95%: 2.8-11.1;

295  $p < 0.0001$ ) mosquitoes are significantly higher in lowest weight class than the larger one when  
 296 compared to homozygote susceptible mosquitoes (Table 1). Overall, mosquitoes harbouring the  
 297 *CYP6P9a*-S susceptible allele displayed higher weight compared to those with the *CYP6P9a*-  
 298 R resistant allele (OR=2.8; CI 95%: 1.5–5.0;  $p = 0.0003$  (Table 1) suggesting that over-  
 299 expression of the *CYP6P9a* gene is reducing the weight of pyrethroid resistant *An. funestus*  
 300 mosquitoes.

301 **Table 1: level of association of *L119F-GSTe2* and *CYP6P9a*-R genotypes with mosquito**  
 302 **weight by comparing low (0-1.0mg) and high (1-2.4mg) weight samples.**

| Genotypes       | <i>L119F-GSTe2</i> |                 | <i>CYP6P9a</i> -R |                 |
|-----------------|--------------------|-----------------|-------------------|-----------------|
|                 | Odds ratio         | <i>p</i> -value | Odds ratio        | <i>p</i> -value |
| <b>RR vs SS</b> | 1.1 (0.4-3.6)      | 0.5             | 5.4 (2.3-12.7)    | < 0.0001        |
| <b>RS vs SS</b> | 0.9 (0.5-1.7)      | 0.4             | 5.6 (2.8-11.1)    | < 0.0001        |
| <b>RR vs RS</b> | 1.2 (0.4-4.1)      | 0.5             | 1.0 (0.5-2.3)     | 0.5             |
| <b>S vs R</b>   | 1 (0.5-2.0)        | 0.5             | 2.8 (1.5-5.0)     | 0.0003          |

303 SS: homozygote susceptible; RR: homozygote resistant; RS: heterozygote; \* significant difference  $p < 0.05$ .

304

### 305 **Influence of *L119F-GSTe2* and *CYP6P9a* mutations on *An. funestus*** 306 **blood feeding success**

307 ***L119F-GSTe2***: out of the 1,200 individuals from field strain mosquitoes that were  
 308 allowed to take a blood meal, 457 (39.6%) successfully fed whereas 743 did not. Among blood-  
 309 fed mosquitoes, a total of 360 were successfully genotyped and 7% (24/360) were homozygous  
 310 resistant (RR), 28% (103/360) were heterozygous resistant (RS) and 65% (233/360) were  
 311 homozygous susceptible (SS) (Figure 2a). On the other hand, out of the 300 unfed mosquitoes  
 312 randomly selected for genotyping, 5% (15/300), 32% (62/300) and 63% (189/300), were

313 homozygous resistant, heterozygotes and homozygote susceptible, respectively (Figure 2a).  
 314 However, the distribution of L119F genotypes was not statistically different between blood-fed  
 315 and unfed mosquitoes ( $\chi^2=0.63, p=0.7$ ). Furthermore, estimation of odds ratio. (OR=1; CI 95%:  
 316 0.5–2.0;  $p = 0.6$ ) showed overall that mosquitoes bearing the 119F-R resistant allele have the  
 317 same chance to have a successful blood feeding than those with the 119F-S susceptible alleles  
 318 (Table 2). This suggests that the ability to take blood is not associated with the *L119F-GSTe2*  
 319 mutation in *An. funestus*.

320 **Table 2: Assessment of the association of *L119F-GSTe2* and *CYP6P9a-R* mutations with**  
 321 ***An. funestus* mosquito blood feeding**

| Genotypes | <i>L119F-GSTe2</i> |                 | <i>CYP6P9a-R</i> |                 |
|-----------|--------------------|-----------------|------------------|-----------------|
|           | Odds ratio         | <i>p</i> -value | Odds ratio       | <i>p</i> -value |
| RR vs SS  | 0.7 (0.2-2.4)      | 0.4             | 3.3 (1.4-7.7)    | 0.01            |
| RS vs SS  | 1.1 (0.62-2.1)     | 0.4             | 1.7 (0.9-3.1)    | 0.1             |
| RR vs RS  | 0.6 (0.2-2.3)      | 0.3             | 1.9 (0.9-4.4)    | 0.1             |
| R vs S    | 1 (0.5-2.0)        | 0.6             | 1.8 (1.1-3.2)    | 0.04            |

322 SS: homozygote susceptible; RR: homozygote resistant; RS: heterozygote; \* significant difference  $p < 0.05$ .

323 ***CYP6P9a-R***: Among a total of 273 mosquitoes that were offered a blood meal 140  
 324 successfully fed (51.3%) whereas, 133 did not. Out of the 140 mosquitoes that blood-fed, 134  
 325 were successfully genotyped for *CYP6P9a-R* allele revealing that 23% (31/134), 50% (67/134)  
 326 and 27% (36/134) were homozygote resistant *CYP6P9a-RR*, heterozygotes *CYP6P9a-RS* and  
 327 homozygote susceptible *CYP6P9a-SS*, respectively (Figure 2b). Among the unfed mosquitoes,  
 328 11.3% (15/133) were homozygote resistant *CYP6P9a-RR*, 47.4% (63/133) heterozygotes and  
 329 41.3% (55/133) were homozygote susceptible *CYP6P9a-SS*. The estimation of odds ratio

330 showed that homozygote resistant CYP6P9a-RR mosquitoes are significantly more able to  
331 blood feed than homozygote susceptible (OR = 3.33; CI 95%: 1.4 -7.7;  $p=0.01$ ). No difference  
332 was observed between heterozygote and homozygote resistant CYP6P9a-RR (OR= 1.9, 95%CI:  
333 0.9-4.4;  $p=0.1$ ) neither with homozygote susceptible CYP6P9a-SS (OR= 1.7, 95%CI: 0.9-3.1;  
334  $p=0.1$ ) mosquitoes (Table 2). Moreover, it was overall observed that mosquitoes with the  
335 CYP6P9a-R resistant allele have a greater chance to blood feed than those bearing the  
336 susceptible allele (OR = 1.9; CI 95%: 1.03-3.2;  $p=0.04$ ) (Table 2).

### 337 **Association between the *L119F-GSTe2* mutation and probing/ 338 **blood feeding duration****

339 Out of the 120 mosquitoes that were individually filmed to assess the influence of  
340 insecticide resistance genes on the probing and feeding duration, 7 (6.14%), 40 (35.08%) and  
341 67 (58.77%) were genotyped as homozygous resistant 119F/F-RR, heterozygous L119F-RS  
342 and homozygous susceptible L/L119, respectively. Overall, regardless of the genotype, the  
343 median value of mosquito's probing duration was 49.5 seconds (minimum = 4s and maximum  
344 = 290s). No difference was observed in the probing time of resistant mosquitoes 119F/F-RR  
345 (Median = 53 seconds) and heterozygotes L119F-RS (Median = 52s) compared to the  
346 homozygote susceptible L/L119 (Median = 52s).

347 Regarding the blood feeding duration, it was observed that the median and mean time  
348 for a mosquito to have a full blood meal was 249.5 seconds and  $303 \pm 181$  seconds respectively,  
349 with a minimum = 68 seconds and a maximum =772 seconds. The feeding duration was longer  
350 (median=269s) in L/L119 mosquitoes compared to L119F-RS (229.5s) and 119F/F-RR (214s)  
351 but the difference was not statistically significant ( $p=0.19$ , Kruskal-Wallis test).

352 **Effect of *L119F-GSTe2* and *CYP6P9a-R* mutations on the blood**  
353 **meal size of *An. funestus***

354 ***L119F-GSTe2*** : From 457 individuals that took a full blood meal it was observed that  
355 the average weighted blood meal of a mosquito regardless of the *L119F-GSTe2* genotype was  
356  $3.4 \pm 1.3$   $\mu\text{l}/\text{mg}$  (minimum = 1.2  $\mu\text{l}/\text{mg}$ ; maximum = 9.2  $\mu\text{l}/\text{mg}$ ). However, the weighted blood  
357 meal was not significantly different ( $P=0.17$ ; Kruskal-Wallis test; Figure 3a) in homozygote  
358 susceptible L119-SS (3.0 $\mu\text{l}/\text{mg}$ ) compared to homozygote resistant L119-RR (2.8 $\mu\text{l}/\text{mg}$ ) and  
359 heterozygote L119F-RS (3.3 $\mu\text{l}/\text{mg}$ ) mosquitoes. This result suggests that the *L119F-GSTe2*  
360 mutation is not associated with the volume of blood meal ingested by *An. funestus*.

361 ***CYP6P9a-R***: The influence of the *CYP6P9a-R* mutation on the volume of blood meal  
362 taken by *An. funestus*, was assessed using the 134 blood fed mosquitoes that were successfully  
363 genotyped for *CYP6P9a-R* allele. Overall, irrespective of the genotype, the mean weighted  
364 blood volume ingested by a mosquito was  $4.8 \pm 2$   $\mu\text{l}/\text{mg}$  (minimum = 2  $\mu\text{l}/\text{mg}$ ; maximum =  
365 13.3 $\mu\text{l}/\text{mg}$ ). However, the weighted blood meal volume of *CYP6P9a*-SS mosquitoes (Median  
366 = 3.71 $\mu\text{l}/\text{mg}$ ) was lower than that of *CYP6P9a*-RS (Median = 4.73  $\mu\text{l}/\text{mg}$ ) and of *CYP6P9a*-  
367 RR (Median = 4.78  $\mu\text{l}/\text{mg}$ ) (Figure 3;  $p<0.004$  for RS vs SS and  $p<0.006$  for RR vs SS, Mann-  
368 Whitney test). No difference in the volume of the blood meal was observed between *CYP6P9a*-  
369 RR and *CYP6P9a*-RS mosquitoes ( $P=0.7$ ; Mann-Whitney test). This result suggests that the  
370 over-expression of *CYP6P9a* gene is associated with an increase of the volume of the blood  
371 meal ingested by *An. funestus*.

372

373

374 **Expression profile of AAPP and D7 family salivary genes according**  
375 **to CYP6P9a-R genotypes**

376 Due to the association observed between the *CYP6P9a*-R genotypes and blood feeding,  
377 an attempt was made to assess whether the genotypes of this gene could be possible associated  
378 with the expression profile of key salivary genes. The expression level of AAPP and 4 members  
379 of the D7 family salivary genes (D7r1, D7r2, D7r3 and D7r4) was analysed and compared  
380 between homozygous resistant (*CYP6P9a*-RR), heterozygous (*CYP6P9a*-RS) and homozygous  
381 susceptible genotype (*CYP6P9a*-SS) mosquitoes. No significant difference in the expression  
382 level of these genes was observed between the three types of mosquitoes although D7 family  
383 genes appeared slightly over-expressed in *CYP6P9a*-RR and *CYP6P9a*-RS when compared to  
384 *CYP6P9a*-SS (Figure 4). This result suggests that *CYP6P9a*-R genotypes do not influence the  
385 expression profile of both AAPP and D7 family genes in the salivary glands of *An. funestus*  
386 mosquitoes.

387

388 **Discussion.**

389 Recently, mutations in the *GST* epsilon 2 and in the promoter region of the cytochrome  
390 P450 *CYP6P9a*, were described as robust molecular markers for tracking metabolic resistance  
391 in pyrethroids resistant populations of *An. funestus* [24,25]. Using these two key markers, this  
392 study assess the possible association of GST- and P450-based metabolic resistance to  
393 pyrethroids on the feeding process and blood meal volume of *An. funestus*.

394

395

## 397 **Association of metabolic resistance on blood feeding success**

398           The present study revealed that *CYP6P9a* but not the *L119F-GSTe2* mutation could  
399 impact the blood feeding success of *An. funestus* mosquito as possessing the *CYP6P9a* resistant  
400 allele increased the likelihood of being successful in blood-feeding. Such selective advantage  
401 of *CYP6P9a* resistance allele was also previously reported in a semi-field study in experimental  
402 hut trial which observed that homozygous *CYP6P9a*-RR mosquitoes were significantly more  
403 likely to blood feed than susceptible SS [25]. This result suggests that *CYP6P9a* -mediated  
404 metabolic resistance might influence the ability of *An. funestus* mosquito to blood feed. In  
405 contrast, the absence of association observed here for the *L119F-GSTe2* mutation needed to be  
406 confirmed by further studies as the low sample of L119F-RR homozygous resistance  
407 mosquitoes might have biased our analysis. This low number of L119F-RR mosquitoes could  
408 itself be linked to unsuccessfully genotyping of this marker in approximately 20% of samples  
409 analysed in this study. This important point highlights the need for further studies to improve  
410 the optimization of the protocol used in this study for the genotyping of the L119F-GSTe2  
411 mutation. On the other hands, the mechanism whereby *CYP6P9a*-R resistant allele could  
412 influence mosquito feeding is unknown and was not investigated in the present study. One  
413 hypothesis to explain this association could be related to the motivation of mosquito to blood  
414 feed. In fact, it has been reported that some mosquito individuals that emerged with insufficient  
415 teneral reserves require an initial blood meal to compensate for insufficient teneral reserves  
416 rather than for egg development during their first gonotrophic cycle [34-36]. This phenomenon  
417 is mostly observed in smaller female mosquitoes that emerge with insufficient reserve [2]. Thus,  
418 we can presume that *CYP6P9a* resistant mosquitoes which were found significantly smaller  
419 than susceptible in the present study were more motivated to blood feed as they were probably

420 the ones requiring more to compensate for their insufficient teneral reserves. However, it's  
421 important to note that it was surprising and unusual to observed CYP6Pa-SS mosquitoes bigger  
422 that CYP6Pa-RR ones since previous studies often reported larger mosquitoes tend to be more  
423 tolerant of insecticides, or that resistant phenotypes are associated with larger body  
424 sizes[37,38]. This unusual observation could be explained by the fact that, instead of using dead  
425 dried and unfed mosquito as usually done, in the present study the weight was estimated using  
426 alive fresh mosquitoes which were fed with sugar solution until 24 hours before being weighted.  
427 With this approach, mosquito's body weight may have been influenced by water and/or  
428 elements of sugar digestion that are eliminated when the mosquito is dried. This point highlight  
429 the need to perform further studies working for instance with dried mosquitoes before confirm  
430 our hypothesis about the association of teneral reserve and CYP6P9a mutation. One other  
431 approach could be to carry out calorimetric assays comparing teneral reserve between CYP6Pa-  
432 SS and CYP6Pa-RR mosquitoes. These further studies would certainly be more informative on  
433 the influence of metabolic resistance on the motivation of *An. funestus* mosquito to blood feed.

434

## 435 **Influence of metabolic resistance on probing time and feeding** 436 **duration**

437 The influence of metabolic resistance on probing time and feeding duration was assessed  
438 in the present study only for *L119F-GSTe2* mutation. Results revealed no significant association  
439 of this metabolic resistance gene on the time spent by a mosquito to probe. The absence  
440 of association of insecticide resistance on mosquito probing time was also reported for the  
441 *knock-down (kdr)* resistance gene in *Anopheles gambiae* with no difference in the probing time  
442 noticed between genotypes (RR, RS and SS) after exposure to untreated and insecticide-treated  
443 net [11]. This seems to indicate that insecticide resistance might not impact the probing duration



444 of *Anopheles* mosquito during blood feeding. However, this hypothesis must be taken with  
445 caution as, to our knowledge, and the exception of the present study as well as the one of Diop  
446 et al, very little information is available on the impact of insecticide resistance on the probing  
447 time during mosquito blood-feeding. In the other hand, even if the difference was not  
448 statistically significant, mosquitoes possessing an *L119F-GSTe2* resistant allele (both  
449 homozygous and heterozygous) spent less time taking their blood meal than susceptible. This  
450 corroborate with observation previously made for *kdr* mutation in *An. gambiae* with lower  
451 feeding duration for homozygous resistant mosquitoes than heterozygote and homozygous  
452 susceptible [11]. The non-significant result observed may be due to the low number of resistant  
453 mosquitoes in the present study. However, from the results, it could be hypothesized that  
454 *L119F-GSTe2* mutation might confer an advantage to homozygous resistant mosquitoes as it  
455 was previously reported that rapid feeding reduces the risk to be killed by the host defensive  
456 behaviour [11,39].

457

## 458 **Effect of metabolic resistance on blood meal volume**

459 In this study, we observed that the volume of blood ingested by a mosquito during a  
460 single blood feeding was associated with the genotype of the P450 *CYP6P9a* but not with the  
461 *L119F-GSTe2*-based metabolic resistance. This suggests that mechanisms involved in  
462 metabolic resistance to pyrethroids in *An. funestus* might influence mosquito life-traits  
463 differently. However, as already discussed above, we cannot exclude that the absence of the  
464 influence observed for *L119F-GSTe2* gene might also be related to the low number of L119F-  
465 RR mosquitoes used in the present study. This latter hypothesis seems moreover reinforced by  
466 the results of previous studies showing *L119F-GSTe2* mutation [22] and *CYP6P9a*-R resistance  
467 gene [40] influencing *An. funestus* fecundity in the same way. The positive association between

468 *CYP6P9a*-R resistant allele and the volume of blood meal is in line with the work of Okoye and  
469 collaborators reporting that pyrethroid resistance mechanism in southern African *An. funestus*  
470 cause no reduction in fitness of this mosquito [41]. Thus, our finding suggests that the over-  
471 expression of *CYP6P9a* gene might probably not compromise the volume of blood ingested of  
472 individual mosquitoes carrying the *CYP6P9a*-R resistant allele. Given that activity of P450  
473 monooxygenases as well as blood meal digestion, have been reported to generate an excess  
474 production of reactive oxygen species (ROS) increasing oxidative stress which could induce  
475 several damages in the mosquito's system that can result to death [42,43], it could have been  
476 expected to see *CYP6P9a*-RR mosquitoes taking lower blood to reduce negative effects of  
477 oxidative stress. This observation could certainly be explained by the ability of *Anopheles*  
478 mosquitoes to cope with oxidative damage after blood feeding by increasing the antioxidant  
479 activity enzymes including, Cu Zn and Mn superoxide dismutase (SOD), catalase, glutathione  
480 peroxides and thioredoxin reductase [44].. This suggests that association between the  
481 *CYP6P9a*-R resistant allele and mosquito's blood meal size could be an indirect consequence  
482 of some other physiological activities. For instance, because *CYP6P9a* resistant mosquitoes  
483 were significantly smaller than their susceptible counterparts, and noting that it has been  
484 demonstrated that the amount of teneral reserves is proportional to the body size of mosquito  
485 [2], we can presume that the high blood meal volume ingested by *CYP6P9a*-RR mosquitoes  
486 might be as a result of a need to compensate for the limited teneral reserves post emergence. In  
487 this case, the association observed here could be an indirect consequence of the negative  
488 association of *CYP6P9a*-R resistant allele recently observed on the larval development of *An.*  
489 *funestus* [40] resulting to a small body size, and by consequence to insufficient teneral reserves  
490 for resistant mosquitoes. Indeed, it was demonstrated that encountering a nutritional  
491 environment by *Anopheles* larvae strongly influences adult fitness-related traits such as body  
492 size and teneral metabolic reserves [2,31,45]. However, our finding did not corroborate with

493 the positive association previously reported between the volume of ingested blood meal and  
494 mosquito body size [2]. Further studies will help elucidate the underlying reason of this  
495 correlation between *CYP6P9a* genotypes and blood meal size.

## 496 **Possible association of *CYP6P9a-R* resistant allele on salivary gland** 497 **genes expression**

498 To obtain a successful blood meal, a female mosquito must balance the risk of death  
499 caused by host defensive behavior against the benefits to feed on a host species that maximize  
500 fertility [46]. Salivary components permit mosquitoes to reduce their engorgement time and  
501 increase their likelihood of survival [5]. In the present study, we assessed the level of expression  
502 of genes encoding for some salivary proteins known to be involved on blood intake process of  
503 mosquitoes such as, AAPP and members of D7 family proteins [6,47,48]. The comparative  
504 analysis of the expression level of these genes between *CYP6P9a* genotypes showed no  
505 significant difference between mosquitoes bearing the resistant allele and those with the  
506 susceptible one. This result suggests that the expression of AAPP and D7 family salivary genes  
507 are not associated to the *CYP6P9a* mutation. This observation is intriguing as some salivary  
508 genes such as D7 family genes were previously reported to be over-expressed in resistant *An.*  
509 *funestus* mosquito compared to susceptible strain [24,49-52]. The lack of significance observed  
510 with the differential expression of genes in the present study could be explained by the fact that,  
511 our analyses in this study were performed on mosquitoes obtained after crosses between two  
512 different strains and therefore sharing the same background, while other studies compared  
513 insecticide resistant field /laboratory mosquitoes and susceptible laboratory strains with  
514 different genetic background [24,49,53]. The absence of influence of the *CYP6P9a* gene on the  
515 expression level of salivary gland genes involved in the blood feeding process observed in the  
516 present study appears to indicate that the association found between this gene and the size of

517 blood meal taken by *An. funestus* mosquito might not be related to the expression of these  
518 salivary genes encoding proteins which mediate the blood meal process.

519 This study revealed that GSTe2-mediated resistance is not associated with the blood  
520 meal intake of *An. funestus* mosquitoes, whereas *CYP6P9a*-based resistance to pyrethroids is  
521 associated with a feeding success and a higher blood meal size. However, this influence on  
522 *Anopheles funestus* blood meal intake is not associated with differential expression of major  
523 salivary gland proteins involved in blood-feeding. Given the rapid growth of insecticide  
524 resistance, it would be interesting to study how this association could affect the fecundity and  
525 the vectorial capacity of *An. funestus* mosquitoes.

526 **Author Contributions:** E.E.N and C.S.W conceived the study; EEN, L.N, C.N SK and  
527 C.S.W designed the study; E.E.N, .L.N, A.B, T.A and M.T carried out the sample  
528 collection; L.N, A.B, and T.A reared and maintained the strain in the insectary; E.E.N, L.N  
529 A.B, and T.A performed blood feeding experiments. L.N, T.A and M.T performed the  
530 molecular analyses; E.E.N, L.N, A.B, M.T and C.N analyzed the data; E.E.N, L.N and  
531 C.S.W wrote the manuscript. M.T C.N and S.K reviewed the manuscript. All authors  
532 approved the manuscript.

### 533 **Ethical approval and consent to participate**

534 Ethical clearance was obtained from the National Ethics Committee of Cameroon's Ministry of  
535 Public Health (N°2018/04/1000/CE/CNERSH/SP) in conformity to the WMA Declaration of  
536 Helsinki. Informed verbal consent was obtained from household owners for using their houses  
537 for mosquito collection.

538 **Acknowledgments:** We thank Dr Micheal KUSIMO and Mr Francis NKEMNGO; native  
539 speakers of English language for accepting to review and edit this paper.

540 **Conflicts of Interest:** The authors declare no conflicts of interests.

541

542

## 543 **References**

- 544 1. WHO (2019) World Malaria Report 2019, Geneva: World Health Organization; 2019. Licence: CC  
545 BY-NC-SA 3.0 IGO.
- 546 2. Briegel H (1990) Fecundity, metabolism, and body size in *Anopheles* (Diptera: *Culicidae*), vectors of  
547 malaria. *Journal of medical entomology* 27: 839-850.
- 548 3. Hurd H (2003) Manipulation of medically important insect vectors by their parasites. *Annual review*  
549 *of entomology* 48: 141-161.
- 550 4. Roitberg BD, Gordon I (2005) Does the *Anopheles* blood meal-fecundity curve, curve? *Journal of*  
551 *Vector Ecology* 30: 83.
- 552 5. Ribeiro J (2000) Blood- feeding in mosquitoes: probing time and salivary gland anti- haemostatic  
553 activities in representatives of three genera (*Aedes*, *Anopheles*, *Culex*). *Medical and veterinary*  
554 *entomology* 14: 142-148.
- 555 6. Islam A, Emran TB, Yamamoto DS, Iyori M, Amelia F, et al. (2019) Anopheline antiplatelet protein  
556 from mosquito saliva regulates blood feeding behavior. *Scientific reports* 9: 3129.
- 557 7. Thiévent K, Hauser G, Elaian O, Koella JC (2019) The interaction between permethrin exposure and  
558 malaria infection affects the host-seeking behaviour of mosquitoes. *Malaria journal* 18: 79.
- 559 8. Taylor P, Hurd H (2001) The influence of host haematocrit on the blood feeding success of *Anopheles*  
560 *stephensi*: implications for enhanced malaria transmission. *Parasitology* 122: 491-496.
- 561 9. Edman JD, Lynn HC (1975) Relationship between blood meal volume and ovarian development in  
562 *Culex nigripalpus* (Diptera: *Culicidae*). *Entomologia experimentalis et applicata* 18: 492-496.
- 563 10. Lehane MJ (2005) *The biology of blood-sucking in insects*: Cambridge University Press.
- 564 11. Diop MM, Chandre F, Rossignol M, Porciani A, Chateau M, et al. (2019) Sub-lethal insecticide  
565 exposure affects host biting efficiency of Kdr-resistant *Anopheles gambiae*. *bioRxiv*: 653980.
- 566 12. Bhatt S, Weiss D, Cameron E, Bisanzio D, Mappin B, et al. (2015) The effect of malaria control on  
567 *Plasmodium falciparum* in Africa between 2000 and 2015. *Nature* 526: 207.
- 568 13. Ranson H, N'guessan R, Lines J, Moiroux N, Nkuni Z, et al. (2011) Pyrethroid resistance in African  
569 anopheline mosquitoes: what are the implications for malaria control? *Trends in parasitology*  
570 27: 91-98.

- 571 14. Strode C, Donegan S, Garner P, Enayati AA, Hemingway J (2014) The impact of pyrethroid  
572 resistance on the efficacy of insecticide-treated bed nets against African anopheline mosquitoes:  
573 systematic review and meta-analysis. PLoS medicine 11.
- 574 15. Martinez- Torres D, Chandre F, Williamson M, Darriet F, Berge JB, et al. (1998) Molecular  
575 characterization of pyrethroid knockdown resistance (kdr) in the major malaria vector  
576 *Anopheles gambiae* ss. Insect molecular biology 7: 179-184.
- 577 16. Ranson H, Jensen B, Vulule J, Wang X, Hemingway J, et al. (2000) Identification of a point mutation  
578 in the voltage- gated sodium channel gene of Kenyan *Anopheles gambiae* associated with  
579 resistance to DDT and pyrethroids. Insect molecular biology 9: 491-497.
- 580 17. Berticat C, Boquien G, Raymond M, Chevillon C (2002) Insecticide resistance genes induce a  
581 mating competition cost in *Culex pipiens* mosquitoes. Genetics Research 79: 41-47.
- 582 18. Saingamsook J, Yanola J, Lumjuan N, Walton C, Somboon P (2019) Investigation of Relative  
583 Development and Reproductivity Fitness Cost in Three Insecticide-Resistant Strains of *Aedes*  
584 *aegypti* from Thailand. Insects 10: 265.
- 585 19. Rowland M (1991) Behaviour and fitness of  $\gamma$ HCH/dieldrin resistant and susceptible female  
586 *Anopheles gambiae* and *An. stephensi* mosquitoes in the absence of insecticide. Medical and  
587 Veterinary Entomology 5: 193-206.
- 588 20. Kumar K, Sharma AK, Kumar S, Patel S, Sarkar M, et al. (2011) Multiple insecticide  
589 resistance/susceptibility status of *Culex quinquefasciatus*, principal vector of bancroftian  
590 filariasis from filaria endemic areas of northern India. Asian Pacific journal of tropical medicine  
591 4: 426-429.
- 592 21. Martins AJ, Bellinato DF, Peixoto AA, Valle D, Lima JBP (2012) Effect of insecticide resistance  
593 on development, longevity and reproduction of field or laboratory selected *Aedes aegypti*  
594 populations. PloS one 7: e31889.
- 595 22. Tchouakui M, Riveron JM, Djonabaye D, Tchapgwa W, Irving H, et al. (2018) Fitness Costs of the  
596 Glutathione S-Transferase Epsilon 2 (*L119F-GSTe2*) Mediated Metabolic Resistance to  
597 Insecticides in the Major African Malaria Vector *Anopheles Funestus*. Genes 9: 645.
- 598 23. Tchouakui M, Fossog BT, Ngannang BV, Djonabaye D, Tchapgwa W, et al. (2019) Investigation of  
599 the influence of a glutathione S-transferase metabolic resistance to pyrethroids/DDT on mating  
600 competitiveness in males of the African malaria vector, *Anopheles funestus*. Wellcome open  
601 research 4.
- 602 24. Riveron JM, Yunta C, Ibrahim SS, Djouaka R, Irving H, et al. (2014) A single mutation in the *GSTe2*  
603 gene allows tracking of metabolically based insecticide resistance in a major malaria vector.  
604 Genome biology 15: R27.
- 605 25. Weedall GD, Mugenzi LM, Menze BD, Tchouakui M, Ibrahim SS, et al. (2019) A cytochrome P450  
606 allele confers pyrethroid resistance on a major African malaria vector, reducing insecticide-  
607 treated bednet efficacy. Science translational medicine 11: eaat7386.

- 608 26. Menze BD, Riveron JM, Ibrahim SS, Irving H, Antonio-Nkondjio C, et al. (2016) Multiple  
609 insecticide resistance in the malaria vector *Anopheles funestus* from Northern Cameroon is  
610 mediated by metabolic resistance alongside potential target site insensitivity mutations. PLoS  
611 one 11: e0163261.
- 612 27. Morgan JC, Irving H, Okedi LM, Steven A, Wondji CS (2010) Pyrethroid resistance in an *Anopheles*  
613 *funestus* population from Uganda. PLoS One 5: e11872.
- 614 28. Hunt R, Brooke B, Pillay C, Koekemoer L, Coetzee M (2005) Laboratory selection for and  
615 characteristics of pyrethroid resistance in the malaria vector *Anopheles funestus*. Medical and  
616 veterinary entomology 19: 271-275.
- 617 29. Riveron JM, Irving H, Ndula M, Barnes KG, Ibrahim SS, et al. (2013) Directionally selected  
618 cytochrome P450 alleles are driving the spread of pyrethroid resistance in the major malaria  
619 vector *Anopheles funestus*. Proceedings of the National Academy of Sciences 110: 252-257.
- 620 30. Wondji CS, Irving H, Morgan J, Lobo NF, Collins FH, et al. (2009) Two duplicated P450 genes are  
621 associated with pyrethroid resistance in *Anopheles funestus*, a major malaria vector. Genome  
622 research 19: 452-459.
- 623 31. Briegel H, Lea AO, Klowden MJ (1979) Hemoglobinometry as a method for measuring blood meal  
624 sizes of mosquitoes (Diptera: Culicidae). Journal of Medical Entomology 15: 235-238.
- 625 32. Livak KJ (1984) Organization and mapping of a sequence on the Drosophila melanogaster X and Y  
626 chromosomes that is transcribed during spermatogenesis. Genetics 107: 611-634.
- 627 33. Koekemoer L, Kamau L, Hunt R, Coetzee M (2002) A cocktail polymerase chain reaction assay to  
628 identify members of the *Anopheles funestus* (Diptera: Culicidae) group. The American journal  
629 of tropical medicine and hygiene 66: 804-811.
- 630 34. Klowden MJ, Lea AO (1978) Blood meal size as a factor affecting continued host-seeking by *Aedes*  
631 *aegypti* (L.). The American journal of tropical medicine and hygiene 27: 827-831.
- 632 35. Ramasamy M, Srikrishnaraj K, Hadjirin N, Perera S, Ramasamy R (2000) Physiological aspects of  
633 multiple blood feeding in the malaria vector *Anopheles tessellatus*. Journal of insect physiology  
634 46: 1051-1059.
- 635 36. Takken W, van Loon JJ, Adam W (2001) Inhibition of host-seeking response and olfactory  
636 responsiveness in *Anopheles gambiae* following blood feeding. Journal of insect physiology 47:  
637 303-310.
- 638 37. Jeanrenaud AC, Brooke BD, Oliver SV (2019) The effects of larval organic fertiliser exposure on  
639 the larval development, adult longevity and insecticide tolerance of zoophilic members of the  
640 *Anopheles gambiae* complex (Diptera: Culicidae). PLoS one 14.
- 641 38. Owusu HF, Chitnis N, Müller P (2017) Insecticide susceptibility of *Anopheles* mosquitoes changes  
642 in response to variations in the larval environment. Scientific reports 7: 1-9.
- 643 39. Lyimo IN, Haydon DT, Mbina KF, Daraja AA, Mbehela EM, et al. (2012) The fitness of African  
644 malaria vectors in the presence and limitation of host behaviour. Malaria journal 11: 425.

- 645 40. Tchouakui M, Jacob Riveron M, Mugenzi LMJ, Djonabaye D, Wondji MJ, et al. (2020) Cytochrome  
646 P450 metabolic resistance (CYP6P9a) to pyrethroids imposes a fitness cost in the major African  
647 malaria vector *Anopheles funestus*. Genetics Society.
- 648 41. Okoye P, Brooke B, Hunt R, Coetzee M (2007) Relative developmental and reproductive fitness  
649 associated with pyrethroid resistance in the major southern African malaria vector, *Anopheles*  
650 *funestus*. Bulletin of Entomological Research 97: 599-605.
- 651 42. Rivero A, Vézilier J, Weill M, Read AF, Gandon S (2010) Insecticide Control of Vector-Borne  
652 Diseases: When Is Insecticide Resistance a Problem? PLoS Pathog 6.
- 653 43. Saeaeue L, Phumala Morales N, Komalamisra N, Vargas RM (2011) Antioxidative systems defense  
654 against oxidative stress induced by blood meal in *Aedes aegypti*. Southeast Asian Journal of  
655 Tropical Medicine and Public Health 42: 542.
- 656 44. Graça-Souza AV, Maya-Monteiro C, Paiva-Silva GO, Braz GR, Paes MC, et al. (2006) Adaptations  
657 against heme toxicity in blood-feeding arthropods. Insect biochemistry and molecular biology  
658 36: 322-335.
- 659 45. Telang A, Wells MA (2004) The effect of larval and adult nutrition on successful autogenous egg  
660 production by a mosquito. Journal of Insect Physiology 50: 677-685.
- 661 46. Edman JD, Scott TW (1987) Host defensive behaviour and the feeding success of mosquitoes.  
662 International Journal of Tropical Insect Science 8: 617-622.
- 663 47. Calvo E, Dao A, Pham VM, Ribeiro JMC (2007) An insight into the sialome of *Anopheles funestus*  
664 reveals an emerging pattern in anopheline salivary protein families. Insect Biochem Mol Biol  
665 37: 164-175.
- 666 48. Calvo E, Mans BJ, Andersen JF, Ribeiro JM (2006) Function and evolution of a mosquito salivary  
667 protein family. J Biol Chem 281.
- 668 49. Elanga-Ndille E, Nouage L, Binyang A, Assatse T, Tene-Fossog B, et al. (2019) Overexpression of  
669 two members of D7 salivary genes family is associated with pyrethroid resistance in the malaria  
670 vector *Anopheles funestus* ss but not in *Anopheles gambiae* in Cameroon. Genes 10: 211.
- 671 50. Riveron JM, Ibrahim SS, Chanda E, Mzilahowa T, Cuamba N, et al. (2014) The highly polymorphic  
672 *CYP6M7* cytochrome P450 gene partners with the directionally selected *CYP6P9a* and  
673 *CYP6P9b* genes to expand the pyrethroid resistance front in the malaria vector *Anopheles*  
674 *funestus* in Africa. BMC genomics 15: 817.
- 675 51. Samb B, Konate L, Irving H, Riveron JM, Dia I, et al. (2016) Investigating molecular basis of  
676 lambda-cyhalothrin resistance in an *Anopheles funestus* population from Senegal. Parasites &  
677 vectors 9: 449.
- 678 52. Wilding C, Weetman D, Rippon E, Steen K, Mawejje H, et al. (2015) Parallel evolution or purifying  
679 selection, not introgression, explains similarity in the pyrethroid detoxification linked GSTE4  
680 of *Anopheles gambiae* and *An. arabiensis*. Molecular genetics and genomics 290: 201-215.



681 53. Wilding CS, Weetman D, Rippon E, Steen K, Mawejje H, et al. (2015) Parallel evolution or purifying  
682 selection, not introgression, explains similarity in the pyrethroid detoxification linked *GSTE4*  
683 of *Anopheles gambiae* and *An. arabiensis*. *Molecular genetics and genomics* 290: 201-215.

684

685

686

687

688

689

## 690 **Figures titles**

691 **Fig1. Effect of metabolic resistance on *An. funestus* mosquito weight.** Distribution of  
692 genotypes of *L119F-GSTe2* (A) and *CYP6P9a-R* (B) markers according to the weight.

693 **Fig2. Association between resistance markers and bloodfeeding.** Distribution of *L119F-*  
694 *GSTe2* (A) and *CYP6P9a-R* (B) genotypes between blood-fed and unfed *An. funestus*  
695 mosquitoes.

696 **Fig3. Influence of metabolic resistance on blood meal size of *An. funestus* mosquitoes.**  
697 Effect of *L119F-GSTe2* (A) and *CYP6P9a-R* (B).

698 **Fig4. Comparative expression of salivary genes between *CYP6P9a* genotypes.** Expression  
699 level of AAPP and some members of D7 family genes in *CYP6P9a-RR* and *CYP6P9a-RS*  
700 mosquitoes in comparison with *CYP6P9a* susceptible mosquitoes. The normalized relative  
701 expression of each gene against two housekeeping genes (*RSP7* and *Actin*) is represented on  
702 the vertical axis. Letters a, b, c, d, e indicates the absence of significant difference in the  
703 expression level of each gene between the three types of mosquitoes.

704

705

706

707

708

709

710

711

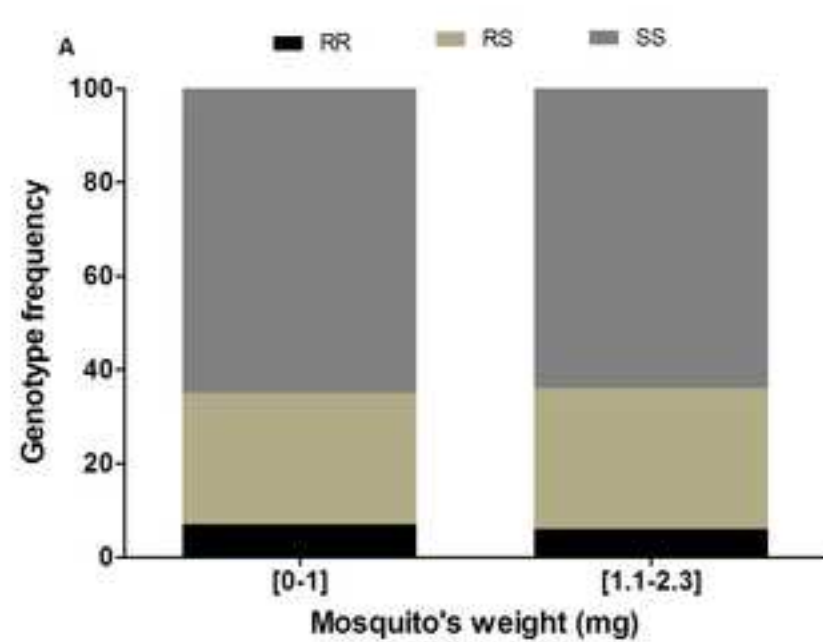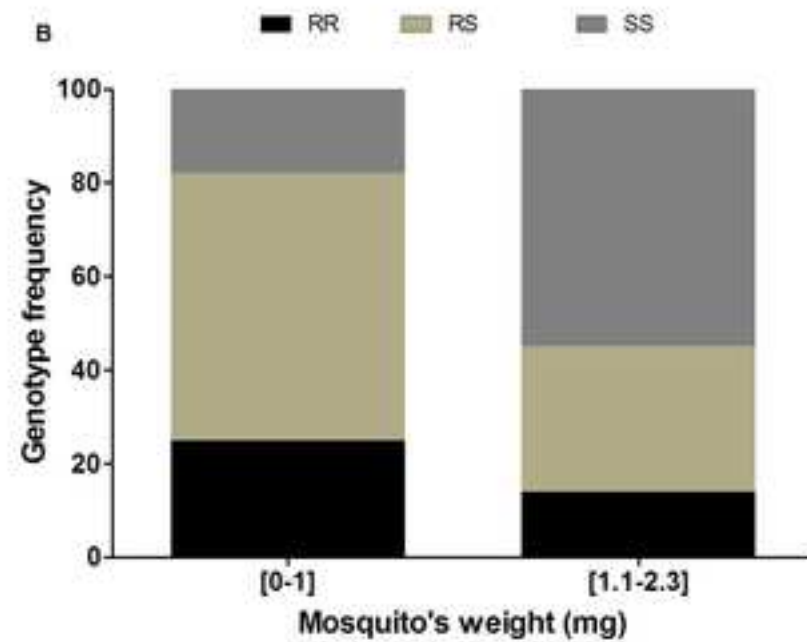

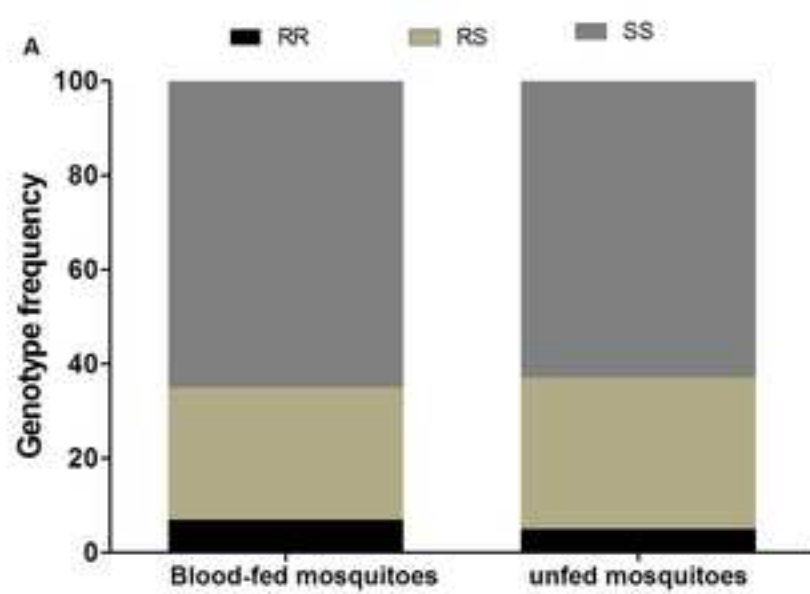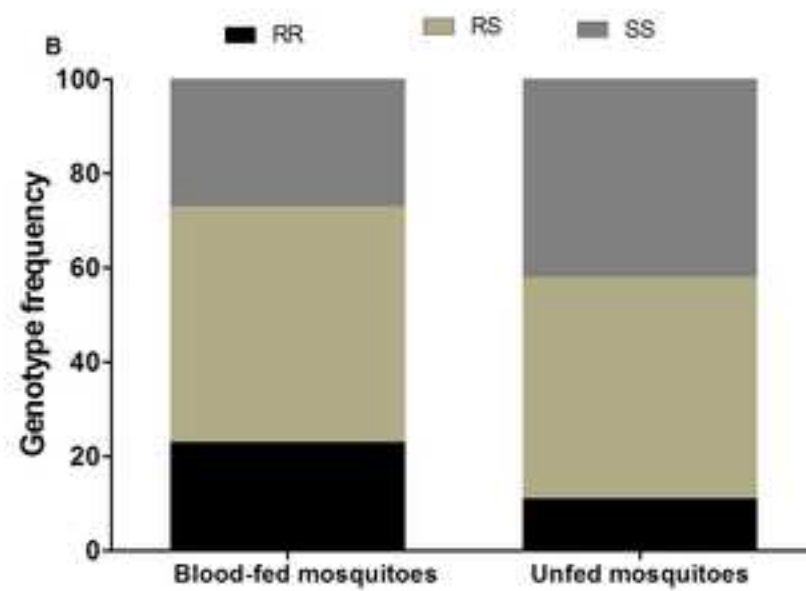

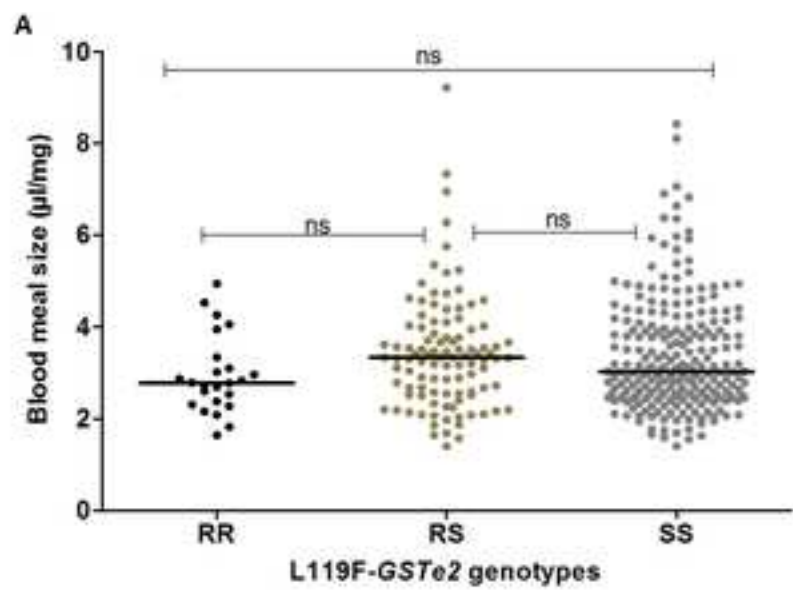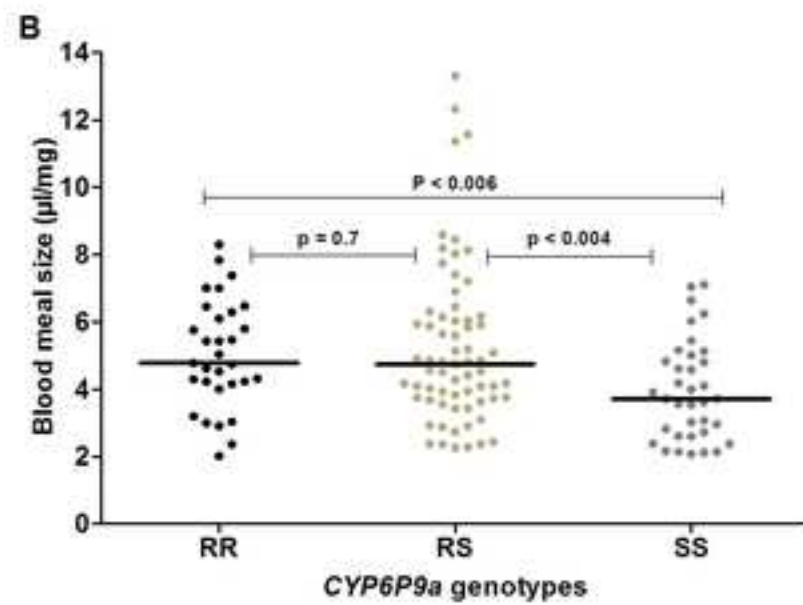

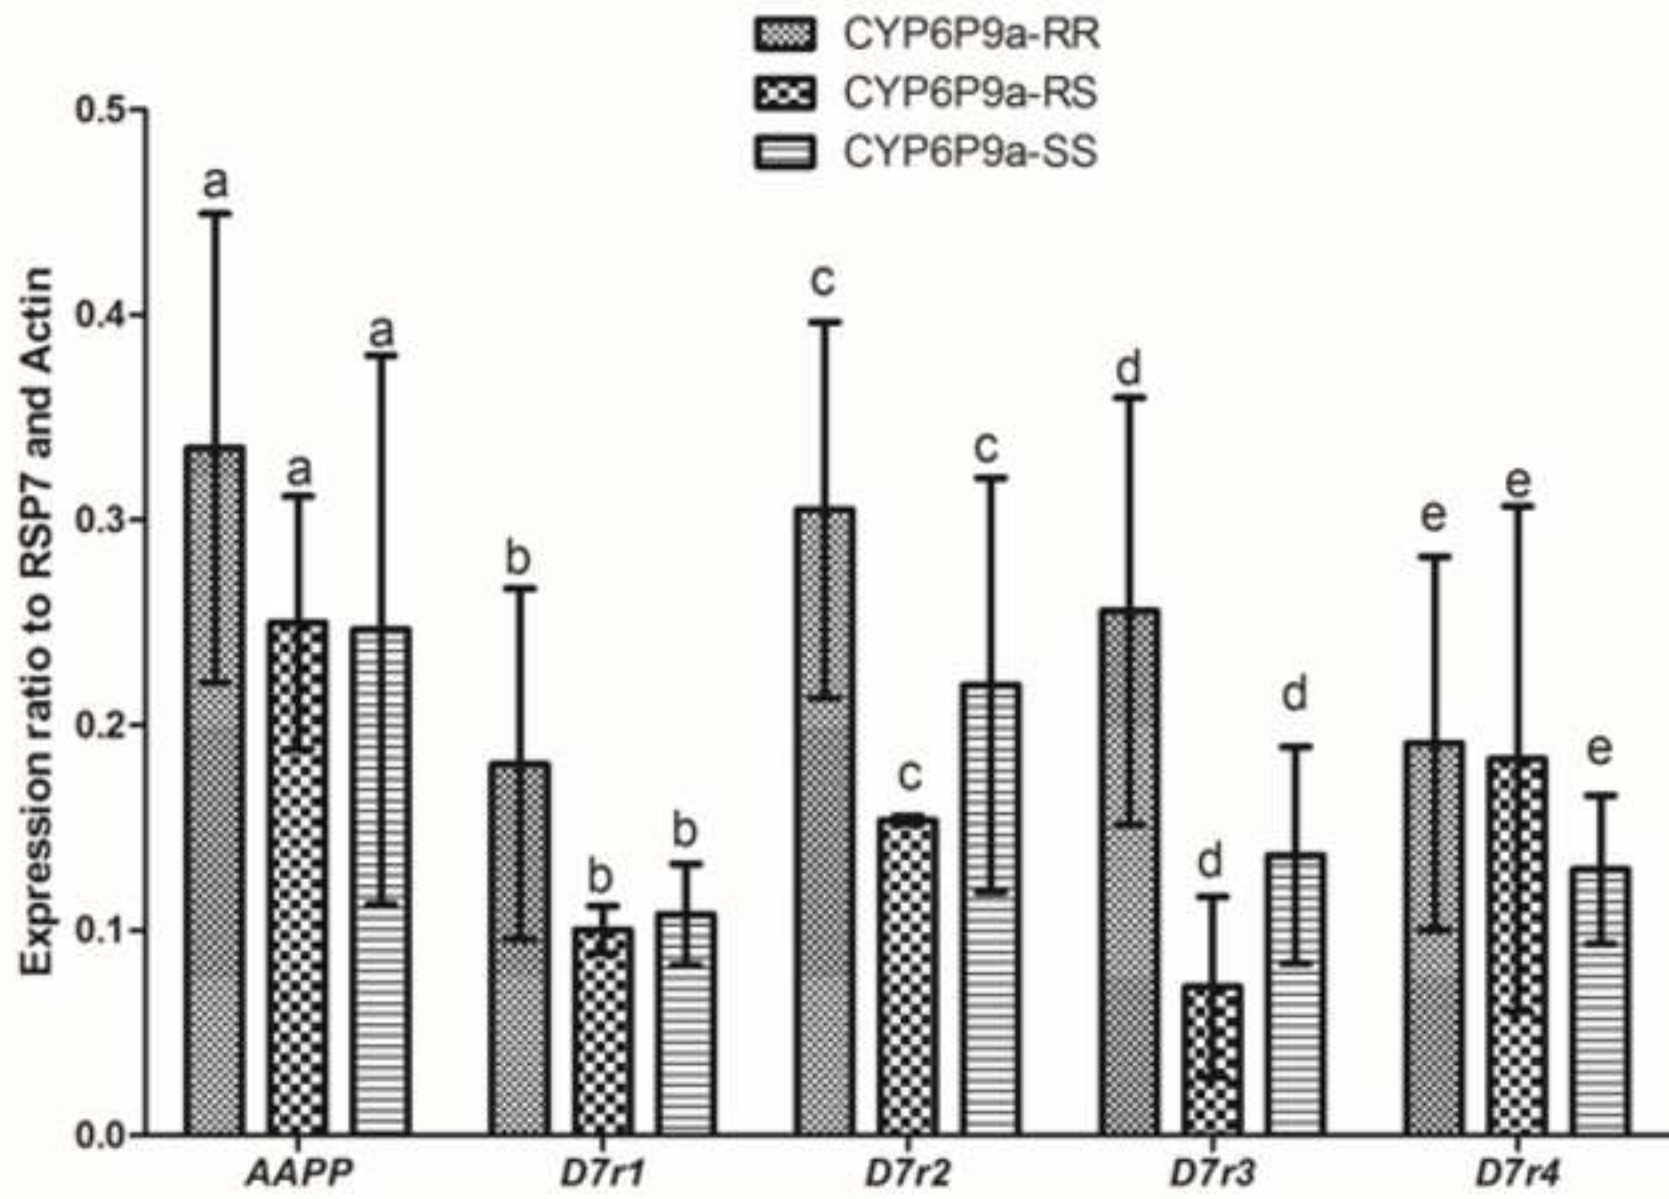

1 **Influence of GST- and P450-based metabolic resistance to**  
2 **pyrethroids on blood feeding in the major African malaria**  
3 **vector *Anopheles funestus***

Formatted: Font: 18 pt

4 **▲** Formatted: Font: 14 pt

5 Lynda NOUAGE<sup>1,2</sup>\*, Emmanuel ELANGA-NDILLE<sup>1</sup>\*, Achille BINYANG<sup>1,2</sup>, Magellan  
6 TCHOUAKUI<sup>1,2</sup>, Tatiane ATSATSE<sup>1,2</sup>, Cyrille NDO<sup>3, 4, ,</sup> Sévilor KEKEUNOU<sup>2</sup>, Charles S.  
7 WONDJI<sup>1,5</sup>

8  
9 <sup>1</sup>Departement of Medical Entomology, Centre for Research in Infectious Diseases (CRID) P.O.  
10 BOX 13591, Yaoundé, Cameroon

11 <sup>2</sup>Department of Animal Biology and Physiology, Faculty of Science, University of Yaoundé 1,  
12 P.O. Box 812, Yaoundé, Cameroon

13 <sup>3</sup>Departement of Parasitology and Microbiology, Centre for Research in Infectious Diseases  
14 (CRID) P.O. BOX 13591, Yaoundé, Cameroon

15 <sup>4</sup>Department of Biological Sciences, Faculty of Medicine and Pharmaceutical Sciences,  
16 University of Douala, P.O. Box 24157, Douala, Cameroon.

17 <sup>5</sup>Department of Vector Biology, Liverpool School of Tropical Medicine, Pembroke Place,  
18 Liverpool L3 5QA, UK

19  
20 ‡: These authors contributed equally to this work

21 \*: Corresponding authors: Emmanuel ELANGA-NDILLE ([emmsdille@yahoo.fr](mailto:emmsdille@yahoo.fr);  
22 [emmanuel.elanga@criid-cam.net](mailto:emmanuel.elanga@criid-cam.net)) and Lynda NOUAGE ([lnouage@gmail.com](mailto:lnouage@gmail.com))

Field Code Changed

Field Code Changed

Field Code Changed

23  
24  
25  
26

## Abstract

Insecticide resistance genes are often associated with pleiotropic effects on various mosquito life-history traits. However, very little information is available on the impact of insecticide resistance on blood feeding process in mosquitoes. Here, using two recently detected DNA-based metabolic markers in the major malaria vector, *An. funestus*, we investigated how metabolic resistance genes could affect the blood meal intake.

After allowing both the field F1 and lab F8 *Anopheles funestus* strains to feed on the human arm for 30 minutes, we assessed the association between key parameters of blood meal process including, probing time, feeding duration, blood feeding success, blood meal size, and markers of glutathione S-transferase (*L119F-GSTe2*) and cytochrome P450 (*CYP6P9a\_R*) - mediated metabolic resistance. None of the parameters of blood meal process was associated with *L119F-GSTe2* genotypes. ~~In-By~~ contrast, for *CYP6P9a\_R*, ~~homozygote-homozygous~~ resistant mosquitoes were significantly more able to blood-feed than ~~homozygote-homozygous~~ susceptible (OR = 3.3; CI 95%: 1.4-7.7; P =0.01) mosquitoes. Moreover, the volume of blood meal ingested by *CYP6P9a*-SS mosquitoes was lower than that of *CYP6P9a*-RS (P<0.004) and of *CYP6P9a*-RR (P<0.006). This suggests that *CYP6P9a* gene ~~affects~~ is linked with the feeding success and blood meal size of *An. funestus*. However, no correlation was found in the expression of *CYP6P9a* and that of genes encoding for salivary proteins involved in blood meal process.

This study suggests that P450-based metabolic resistance may ~~increase~~ influence the blood feeding ~~ability-process~~ of *Anopheles funestus* mosquito and by consequentl ~~y~~ -its ability to transmit malaria vectors and potentially impacting their vectorial capacity ~~-parasites~~.

**Keywords:** Malaria, Mosquito, *Anopheles funestus*, Insecticide resistance, Metabolic resistance, GST, P450, Blood meal intake

Formatted: Font: 18 pt

Formatted: Indent: First line: 0.49"

Formatted: Font: Italic



51

## 52 **Introduction**

53 Malaria remains a major public health scourge in sub-Saharan Africa despite significant  
54 progress made since the 2000s in reducing its burden [1]. This disease is caused by a  
55 *Plasmodium* parasite transmitted by *Anopheles* mosquito species while taking a blood meal  
56 from humans. Blood feeding is essential for female mosquito's fecundity [2], as *Anopheles*  
57 species like all anautogenous female mosquitoes, require a blood meal to obtain amino acids  
58 needed to synthesize yolk proteins for eggs maturation [3,4].

59 ~~Mosquito's blood~~ The blood feeding success of mosquitoes ~~feeding success~~ is facilitated by the  
60 ~~pharmacological-biochemical~~ properties of salivary gland proteins [5]. Indeed, some salivary  
61 proteins such as anopheline antiplatelet protein (AAPP), apyrase, gambiae Salivary Gland  
62 protein 1-like-6 (gSG6) and members of D7 family have been identified as vasodilators, anti-  
63 coagulants and inhibitors of platelet aggregation allowing mosquitoes to overcome host  
64 haemostatic mechanisms and to have a successful blood meal [5-8].

65 Mosquito's fecundity was shown to vary by source and size of the blood meal with a difference  
66 of these two parameters resulting in significant variations of the number of eggs laid by each  
67 female mosquito [4,8]. It has been shown that the number of eggs laid per female is positively  
68 associated to the amount of blood ingested as larger blood meals resulted in an increase of the  
69 number of females that developed eggs and the number of eggs per female [9,10]. The volume  
70 of blood taken by a mosquito could be affected by a range of intrinsic (host immunity) and  
71 extrinsic factors including ambient temperatures, mosquito age, parity status, gonotrophic  
72 cycle, blood feeding history and infection status [10]. More recently, it was reported that  
73 exposure to pyrethroids could also significantly influence the blood meal the process of taking

Formatted: Font: 18 pt

Formatted: Indent: First line: 0.49"

Formatted: Font: Italic

74 ~~a blood meal process~~ and the blood meal volume ingested by Kdr-resistant *Anopheles gambiae*  
75 ~~mosquito females~~ [11].

76 Pyrethroids (PY) are the insecticide class mostly used in the last two decades through ITNs and  
77 IRS strategies to control malaria transmission [12]. Unfortunately, the widespread use of these  
78 insecticides has favoured the development of resistance in malaria vector species [13,14].  
79 Resistance to pyrethroids involves two main mechanisms: (i) metabolic resistance, due to the  
80 increase expression level of detoxifying enzymes, belonging to three families: the cytochrome  
81 P450 monooxygenases, the glutathione S-transferases and the carboxylesterases; and (ii) target-  
82 site resistance due to mutations in the voltage sodium channels known as knock-down (kdr)  
83 mutations [15,16]. Although resistance mechanisms help mosquitoes to survive under  
84 continuous insecticide pressure, these actions are costly and may negatively affect mosquito's  
85 fitness including body size, adult longevity, larval development time, fecundity, fertility,  
86 mating competitiveness and blood feeding capability [17-19]. For target-site resistance, a  
87 decreased longevity and an increased larval development time have been reported in *kdr*-  
88 pyrethroid-resistant mosquitoes [20,21]. Moreover, a recent study suggested that *kdr*-based  
89 resistance could impact blood feeding with heterozygote (*kdr*-RS) and susceptible (*kdr*-SS)  
90 mosquitoes taking higher blood volume than homozygote (*kdr*-RR) resistant individuals [11].

91 In some cases, resistant mosquitoes displayed a significant advantage compared to their  
92 susceptible counterparts as shown recently for female longevity [22] and vectorial capacity  
93 [23]. ~~In contrast~~ However, little is known on the impact of metabolic resistance as DNA-based  
94 markers were not previously available for this mechanism; thereby limiting the ability to  
95 investigate its physiological impact on the blood feeding process in mosquitoes. However,  
96 taking advantage of the identification of the first DNA-based metabolic marker in *An. funestus*  
97 mosquito, one study reported that a GST-based metabolic resistance caused by a leucine to  
98 phenylalanine amino acid change at codon 119 in the glutathione S-transferase epsilon 2

Formatted: English (United Kingdom)

99 (*L119F-GSTe2*) [24], has a detrimental impact on *An. funestus* fitness. The authors reported  
100 that s-as—\_field-resistant mosquitoes exhibited a reduced fecundity and slower larval  
101 development but an increased adult longevity [22]. On the other hand, a new DNA-based assay  
102 was recently designed for cytochrome P450-mediated resistance (the *CYP6P9a-R*) in *An.*  
103 *funestus*. This marker showed that mosquitoes carrying this P450-resistant allele survived and  
104 succeeded in blood feeding more often than did susceptible mosquitoes when exposed to  
105 insecticide-treated nets [25]. The design of assays for both GST- and P450-based resistance  
106 now offers a great opportunity to explore how the blood feeding process is influenced by  
107 metabolic resistance mechanism in malaria vectors and further assess how resistance may  
108 impact the vectorial capacity of mosquitoes to transmit malaria in the natural environment.  
109 Here, we investigated the effect of metabolic resistance to pyrethroids on the blood feeding  
110 process in *An. funestus*, using the two DNA-based metabolic resistance markers: *L119F-GSTe2*  
111 and *CYP6P9a-R* [24,25]. Specifically, we assessed the association between the genotypes of  
112 these metabolic resistance markers and key parameters of blood feeding including mosquito  
113 probing time, feeding duration and the blood meal size.

114  
115

## 116 **Material and Methods**

### 117 **Mosquito collection and rearing**

118 Experiments were carried out using both field and lab strains of *An. funestus*. Field  
119 mosquitoes (F<sub>1</sub>) were generated from indoor resting female (F<sub>0</sub>) collected in Mibellon (6°46'N,  
120 11° 70'E), a village located in a rural area of the savanna-forest region in Cameroon, Central  
121 Africa where the *L119F-GSTe2* has been reported [26]. Blood-fed field collected females were  
122 kept in paper cups and transported to the insectary of the Centre for Research in Infectious

Formatted: Font: 18 pt

Formatted: Font: 16 pt

Formatted: Indent: First line: 0.49"

123 Diseases (CRID) in Yaoundé where they were kept for 4–5 days until they became fully gravid  
124 and were then induced to lay eggs using the forced eggs-laying method [27]. The eggs were  
125 placed in paper cups containing water to hatch, after which the larvae were transferred in to  
126 trays and reared to adults. To assess the effect of *CYP6P9a* marker, F<sub>8</sub> progenies were generated  
127 from ~~reciprocal~~-crosses established between the pyrethroid susceptible laboratory strain  
128 (FANG) and the resistant (FUMOZ-R) lab strain. These two *An. funestus* lab strains were  
129 colonized from mosquitoes collected in Southern Africa region. FUMOZ is a pyrethroid  
130 resistant strain established in the insectary from wild-caught *An. funestus* mosquito species from  
131 southern Mozambique [28]. The previous study reported that the over-expression of two  
132 duplicated P450 genes, *CYP6P9a* and *CYP6P9b*, constitute the main mechanism driving  
133 pyrethroid resistance in this strain [29,30] for which the *119F-GSTe2* allele is absent [24]. The  
134 FANG strain is completely susceptible to pyrethroids colonized from Calueque in southern  
135 Angola [28].

136

## 137 **Blood feeding experiments and blood meal size quantification**

Formatted: Font: 16 pt

### 138 **Blood feeding process:**

Formatted: Font: 14 pt, Not Italic

139 Since blood meal volume has previously been reported to correlate with mosquito size  
140 [2], individuals used for blood feeding experiments were ~~firstly starved for 24h then~~ grouped  
141 according to their size. Mosquito size was determined by weighing (using an analytical micro-  
142 scale, SARTORIUS, Goettingen, Germany-). ~~Each starved~~ individual (adult females aged 3-  
143 7 days) ~~starved for 24h was and~~ immobilized by chilling ~~them~~ for 2 minutes at 5°C. Each  
144 mosquito was then placed in paper cups covered with black sheet for about an hour before given  
145 a blood meal. In order to evaluate the association between metabolic resistant markers on blood  
146 meal size, m Mosquitoes were allowed to bite for 30 min on the bare forearm of a single human  
147 volunteer ~~after informed consent and then genotyped for L119F-GSTe2 and CYP6P9a.~~

Formatted: Indent: First line: 0.49"

148 [Following to the protocol for which we obtained an ethical clearance was delivered to us by the](#)  
149 [Cameroonian national ethical committee, human volunteer was recruited among technicians](#)  
150 [working at the insectary of CRID and who by consequence are frequently exposed to](#)  
151 [mosquitoes. An informed consent was obtained after explanation of the purpose of the study.](#)

152 The duration of probing and blood feeding was assessed using a batch of 120 F<sub>1</sub> female  
153 field-collected mosquitoes. For this purpose, mosquitoes were individually transferred in  
154 polystyrene plastic cups covered with netting. They were allowed to rest for 15 min before  
155 observations began. During the blood intake, each mosquito was filmed with a Digital HD  
156 Video Camera (Canon PC2154, Canon INC, Japan) placed beside the plastic cup. At the end of  
157 the time allowed for feeding, the film for each mosquito was analysed and the parameters such  
158 as probing time (defined as the time taken from initial insertion of the mouthparts in the skin  
159 until the initial engorgement of blood) [5] and total feeding duration, were recorded, using a  
160 digital timer. Due to the low density of female mosquitoes obtained at F<sub>8</sub> generation from  
161 ~~reciprocal~~ crosses of the lab strain mosquitoes, experiments to estimate the probing and the  
162 feeding duration of this strain were not investigated.

163 To determine the blood meal size for both strains, batches of 25 mosquitoes grouped  
164 according to their weight were allowed to bite on a human arm. In this case, neither the probing  
165 time nor the feeding duration was recorded. After the trial, the whole abdomen of successfully  
166 fed mosquitoes (evident by red-coloration engorgement of the abdomen) was extracted and  
167 stored in an individual 1.5 ml microtube at -20°C to measure the blood meal size. The rest of  
168 the carcasses as well as unfed mosquitoes were kept individually in a microtube containing  
169 RNA-later and stored at -20°C.

## Blood meal size quantification

To compare the volume of blood ingested between resistant and susceptible mosquitoes.

The volume of blood ingested by each mosquito was determined by quantifying the haemoglobin amount, as previously described [31]. Briefly, abdomens of blood fed mosquitoes were homogenized in 0.5 ml of Drabkin's reagent (containing 1.0g of sodium bicarbonate, 0.1g potassium carbonate, 0.05g potassium cyanide, 0.2g potassium ferricyanide all diluted in 1L of distilled water). This reagents-which converts the haemoglobin into haemoglobin cyanide (HiCN). After 20 minutes at room temperature and the addition of 0.5 ml of chloroform solution, samples were centrifuged at 5600 rpm (3512 rcf) for 5 min. The aqueous supernatant containing HiCN was transferred in a new 1.5 ml microtube. An aliquot of 200µl from each sample was transferred to a microplate and the optical density (OD) read at a wavelength of 620nm in a spectrophotometer (EZ Read 400, biochrom, Cambridge, UK). OD for each sample were read in duplicate and the average value between the two replicates was considered as OD value of the sample. In parallel, OD read on various amounts of human volunteer blood added to Drabkin's reagent in individual microtubes were used as control to generate calibration curves and the regression line used to assess the relationship between OD and blood volume. For each sample, the blood meal size was estimated according to the weight by dividing the blood volume estimated using the regression line by the average weigh of each batch of mosquitoes constituted after the weighing. The blood meal size was then expressed in µL of blood per mg of weight.

Formatted: Font: 16 pt

Formatted: Indent: First line: 0.49"

## 197 **Molecular species identification**

198 ~~To determine the species composition of *An. funestus* group among the samples.~~

199 **g**Genomic DNA (gDNA) was extracted from both blood-fed and unfed mosquitoes using the  
200 Livak protocol [32]. Instead of using the whole body as done for unfed mosquitoes, DNA was  
201 extracted from the carcasses of fed mosquitoes after removing the abdomen for blood volume  
202 quantification. The concentration and purity of the extracted gDNA were subsequently  
203 determined using a **a** NanoDrop™ spectrophotometer (Thermo Scientific, Wilmington, USA)  
204 before storage at -20 °C. An aliquot of gDNA extracted from field-collected strain **was** used  
205 for molecular identification by a polymerase chain reaction [33]. ~~to determine species~~  
206 ~~composition of *An. funestus* group among the samples.~~

## 208 **Genotyping of *L119F-GSTe2* mutation in field-collected strain**

209 The *L119F-GSTe2* mutation was genotyped using gDNA extracted from carcasses of  
210 field-collected strains following an allele specific PCR diagnostic assay previously described  
211 [22]. The primers sequences are given in table S1. PCR was performed in Gene Touch thermal  
212 cycler (Model TC-E-48DA, Hangzhou, 310053, China), in a reaction volume of 15 µl using  
213 10 µM of each primer, 10X Kapa Taq buffer A, 0.2 mM dNTPs, 1.5 mM MgCl<sub>2</sub>, 1U Kapa Taq  
214 (Kapa Biosystems, Wilmington, MA, USA) and 1µl of genomic DNA as template. The cycle  
215 parameters were: 1 cycle at 95 °C for 2 min; 30 cycles of 94 °C for 30 s, 58 °C for 30 s, 72 °C  
216 for 1 min and then a final extension at 72 °C for 10 min. ~~The PCR products were size separated~~  
217 ~~on a 2 % agarose gel stained with Midori Green Advance DNA Stain (Nippon genetics Europe~~  
218 ~~GmbH) and visualised using a gel imaging system.~~~~PCR products were separated on 2% agarose~~  
219 ~~gel by electrophoresis.~~ The size of the diagnostic band was 523 bp for homozygous resistant

Formatted: Font: 16 pt

Formatted: Indent: First line: 0.49"

Formatted: Font: 16 pt

Formatted: Indent: First line: 0.49"

220 (RR) and 312 bp for homozygous susceptible (SS), while heterozygous (RS) showed the two  
221 bands.

222

### 223 **Genotyping of *CYP6P9a*-R allele in lab strain mosquitoes**

Formatted: Font: 16 pt

224 The *CYP6P9a* resistance marker was genotyped using the protocol recently designed by  
225 [25]. A PCR-RFLP were carried out using gDNA extracted from the carcasses of F<sub>8</sub> generation  
226 individuals obtained from the reciprocal crosses between FANG and FUMOS strains used for  
227 blood feeding. Briefly, a partial *CYP6P9a* upstream region was amplified in a final volume of  
228 15µl PCR mixture containing ~~1.5µl of~~ 10X Kapa Taq buffer A (Kapa Biosystems, Wilmington,  
229 MA, USA), ~~0.12µl of~~ 5 U/µl KAPA taq, ~~0.12µl of~~ 25µM dNTP, ~~0.75µl of~~ 25µM MgCl<sub>2</sub>,  
230 ~~0.51µl~~ 10 mM of each primer, 10.49µl of dH<sub>2</sub>O and 1µl of genomic DNA. The PCR cycle  
231 parameters were as follows~~ed~~: the initial denaturation step at 95°C for 5 minutes follow~~ed~~  
232 by 35 cycles of 94°C for 30 seconds, 58°C for 30 seconds and 72°C for 45 seconds and a final  
233 extension step of 72°C for 10 minutes. The PCR products were size separated on a 1.5 %  
234 agarose gel stained with Midori Green Advance DNA Stain (Nippon genetics Europe GmbH)  
235 and visualised using a gel imaging system to confirm the product size (450bp). Then, the PCR  
236 product was incubated at 65°C for 2 hours. This was done in 0.2ml PCR strip tubes using 5µl  
237 of PCR product, 1µl of cutSmart buffer, 0.2µl of 2 units of Taq1 enzyme (New England Biolabs,  
238 [catalog: ER0672](#)) and 3.8µl of dH<sub>2</sub>O. Size separation was done on a 2.0% agarose gel stained  
239 with Midori Green Advance DNA Stain at 100V for 30 minutes. The gel was visualised using  
240 the gel imaging system.

Formatted: Indent: First line: 0.49"

241



242 **Gene expression profiling of major salivary genes encoding**  
243 **proteins involved in blood meal process.**

Formatted: Font: 16 pt

244 The expression profiles of a set of salivary genes encoding for proteins involved in blood  
245 meal process was compared between CYP6P9a-RR, CYP6P9a-RS and CYP6P9a-SS *An.*  
246 *funestus* mosquitoes. For each gene, two pairs of exon-spanning primers was designed for each  
247 gene using Primer3 online software (v4.0.0; <http://bioinfo.ut.ee/primer3/>) and only primers with  
248 PCR efficiency between 90 and 110% determined using a cDNA dilution series obtained from  
249 a single sample, were used for qPCR analysis. Taking into account this criteria of efficiency,  
250 only the AAPP and four members of D7 family genes (D7r1, D7r2, D7r3, and D7r4) were used  
251 for this analysis. Primers are listed in Table S1. Total RNA was extracted from three batches of  
252 10 whole females of 3–5 days old from CYP6P9a-RR, CYP6P9a-RS and CYP6P9a-SS  
253 mosquitoes. RNA was isolated using the RNeasy Mini kit (Qiagen) according to the  
254 manufacturer's instructions. The RNA quantity was assessed using a NanoDrop ND1000  
255 spectrophotometer (Thermo Fisher) and 1µg from each of the three biological replicates for  
256 each batch of mosquitoes was used as a template for cDNA synthesis using the SuperScript III  
257 (Invitrogen, Waltham, Massachusetts, USA ) with oligo-dT20 and RNase H, following the  
258 manufacturer's instructions. The qPCR assays were carried out in a MX 3005 real-time PCR  
259 system (Agilent, Santa Clara, CA 95051, United States) using Brilliant III Ultra-Fast SYBR  
260 Green qPCR Master Mix (Agilent). A total of 10 ng of cDNA from each sample was used as  
261 template in a three-step program involving a denaturation at 95 °C for 3 min followed by 40  
262 cycles of 10 s at 95 °C and 10 s at 60 °C and a last step of 1 min at 95 °C, 30 s at 55 °C, and 30  
263 s at 95 °C. The relative expression and fold-change of each target gene in CYP6P9a-RR and  
264 CYP6P9a-RS relative to CYP6P9a-SS was calculated according to the  $2^{-\Delta\Delta CT}$  method  
265 incorporating PCR efficiency after normalization with the housekeeping RSP7 ribosomal

Formatted: Indent: First line: 0.49"

Field Code Changed

266 protein S7 (VectorBase ID: AFUN007153;) and the actin 5C (vectorBase ID: AFUN006819)  
267 genes for *An. funestus*.

268

## 269 **Statistical analysis**

270 All analyses were conducted using GraphPad Prism version 7.00 software. We  
271 estimated a Fisher's exact probability test and the odds-ratio of *L119F-GSTe2* and *CYP6P9a*  
272 genotypes (homozygous resistant = RR, heterozygote resistant=RS and homozygous resistant  
273 =SS) and both susceptible (S) and resistant (R) alleles. This allowed ~~us to~~ the -assessment of  
274 ~~the~~ association between: a) insecticide resistance and mosquito's weight by comparing the  
275 proportions of the genotypes of both genes in each group established after weighing; b) blood  
276 feeding success and insecticide resistance by comparing the proportion of each genotype in  
277 both fed and unfed mosquitoes. The feeding duration was grouped into four intervals with 1  
278 minute (60s) amplitude for each interval.~~After arbitrary regrouping the time into four different~~  
279 ~~intervals with same amplitude.~~ The duration of probing and feeding was analysed by  
280 comparing the proportion of mosquitoes (for *L119F-GSTe2* and *CYP6P9a*) with different  
281 genotypes in each defined intervals using ~~with~~ chi-square test. ~~by comparing the proportion of~~  
282 ~~*L119F-GSTe2* and *CYP6P9a* genotypes in each defined time interval.~~ After estimating the  
283 median of weighted blood meal for each genotype, Kruskal-Wallis and Mann-Whitney tests  
284 were used to compare the differences between more than two groups and between two groups,  
285 respectively as Shapiro welch test showed non normal distribution.-

286

## 287 **Results**

### 288 **Metabolic resistance genes and *An. funestus* mosquito's weight**

Formatted: Font: 16 pt

Formatted: Indent: First line: 0.49"

Formatted: Font: 18 pt

Formatted: Font: 18 pt, English (United Kingdom)

Formatted: Font: 16 pt, Font color: Auto

Formatted: Font: 16 pt

Formatted: Font: 16 pt, Not Bold

289 \_\_\_\_\_A total of 1,200 and 273 female mosquitoes were weighed, respectively for field strain  
290 (F<sub>1</sub> generation) and lab strain (F<sub>8</sub> generation). The mean weight of a mosquito was 0.9 ± 0.010  
291 mg (minimum = 0.2 mg; maximum = 2.3mg) and 0.89 ± 0.016 mg (minimum = 0.2 mg;  
292 maximum = 1.7mg) for field and lab strain respectively. No significant difference was found  
293 between the mean weights of two strains. For all the analyses, we arbitrarily grouped  
294 mosquitoes according to their weight values, into two different classes as followed: [0 - 1.0]  
295 mg and [1.1 - 2.3] mg. Analysis of the distribution of *L119F-GSTe2* mutation genotypes in each  
296 class of field strain mosquitoes showed no association between the mosquito's weight and  
297 *L119F-GSTe2* genotypes ( $\chi^2 = 0.15$ ;  $p = 0.9$ ; OR =1.2, 95%CI: 0.3742 - 4.176, for RR vs RS;  
298 OR=1.1, 95%CI: 0.3659 - 3.606 for RR vs SS; OR = 0.9, 95%CI: 0.4943 - 1.709 for RS vs SS)  
299 (Figure 1 and Table 1). This absence of correlation between the *L119F-GSTe2* genotypes and  
300 the weight of mosquitoes was confirmed at the allele level (OR=1; 95%: CI: 0.5–2.0;  $p =0.5$ )  
301 showing that the L119F mutation may not ~~impact-associated with~~ the weight of this *An. funestus*  
302 field population (Table 1). In contrast, a significant association was observed between  
303 *CYP6P9a* genotypes and the weight of mosquito ( $\chi^2= 29.54$ ,  $p<0.0001$ ). Indeed, proportions of  
304 RR and RS genotypes were higher than that of SS in the lowest weight class, whereas, for larger  
305 weight, mosquitoes with SS genotype were more abundant (67.2%). This association is further  
306 supported by odds ratio estimates showing that proportions of homozygote resistant (RR)  
307 (OR=5.4; CI 95%: 2.3-12.7;  $p<0.0001$ ) and heterozygote (RS) (OR=5.6; CI 95%: 2.8-11.1;  
308  $p<0.0001$ ) mosquitoes are significantly higher in lowest weight class than the larger one when  
309 compared to homozygote susceptible mosquitoes (Table 1). Overall, mosquitoes harbouring the  
310 *CYP6P9a*-S susceptible allele displayed higher weight compared to those with the *CYP6P9a*-  
311 R resistant allele (OR=2.8; CI 95%: 1.5–5.0;  $p =0.0003$  (Table 1) suggesting that over-  
312 expression of the *CYP6P9a* gene is reducing the weight of pyrethroid resistant *An. funestus*  
313 mosquitoes.

**Table 1: level of association of *L119F-GSTe2* and *CYP6P9a-R* genotypes with mosquito weight by comparing low (0-1.0mg) and high (1-2.4mg) weight samples.**

| Genotypes       | <i>L119F-GSTe2</i> |                 | <i>CYP6P9a-R</i> |                 |
|-----------------|--------------------|-----------------|------------------|-----------------|
|                 | Odds ratio         | <i>p</i> -value | Odds ratio       | <i>p</i> -value |
| <b>RR vs SS</b> | 1.1 (0.4-3.6)      | 0.5             | 5.4 (2.3-12.7)   | < 0.0001        |
| <b>RS vs SS</b> | 0.9 (0.5-1.7)      | 0.4             | 5.6 (2.8-11.1)   | < 0.0001        |
| <b>RR vs RS</b> | 1.2 (0.4-4.1)      | 0.5             | 1.0 (0.5-2.3)    | 0.5             |
| <b>S vs R</b>   | 1 (0.5-2.0)        | 0.5             | 2.8 (1.5-5.0)    | 0.0003          |

SS: homozygote susceptible; RR: homozygote resistant; RS: heterozygote; \* significant difference  $p < 0.05$ .

Formatted: Font: Bold

Formatted Table

**Impact Influence of *L119F-GSTe2* and *CYP6P9a* mutations on *An. funestus* blood feeding success**

Formatted: Font: 16 pt

***L119F-GSTe2***: out of the 1,200 individuals from field strain mosquitoes that were allowed to take a blood meal, 457 (39.6%) successfully fed whereas 743 did not. Among blood-fed mosquitoes, a total of 360 were successfully genotyped and 7% (24/360) were ~~homozygote~~ homozygous resistant (RR), 28% (103/360) were ~~heterozygotes~~ heterozygous resistant (RS) and 65% (233/360) were ~~homozygotes~~ homozygous susceptible (SS) (Figure 2a). On the other hand, out of the 300 unfed mosquitoes randomly selected for genotyping, 5% (15/300), 32% (62/300) and 63% (189/300), were ~~homozygote~~ homozygous resistant, heterozygotes and homozygote susceptible, respectively (Figure 2a). However, the distribution of *L119F* genotypes was not statistically different between blood-fed and unfed mosquitoes ( $\chi^2=0.63$ ,  $p=0.7$ ). Furthermore, estimation of odds ratio. (OR=1; CI 95%: 0.5–2.0;  $p = 0.6$ ) showed overall that mosquitoes bearing the *L119F-R* resistant allele have the same chance to have a

Formatted: Indent: First line: 0.49"

332 successful blood feeding than those with the 119F-S susceptible alleles (Table 2). This suggests  
 333 that the ability to take blood is not impacted-associated withby the *L119F-GSTe2* mutation in  
 334 *An. funestus*.

335 **Table 2: Assessment of the association of *L119F-GSTe2* and *CYP6P9a-R* mutations with**  
 336 ***An. funestus* mosquito blood feeding**

| Genotypes | <i>L119F-GSTe2</i> |                 | <i>CYP6P9a-R</i> |                 |
|-----------|--------------------|-----------------|------------------|-----------------|
|           | Odds ratio         | <i>p</i> -value | Odds ratio       | <i>p</i> -value |
| RR vs SS  | 0.7 (0.2-2.4)      | 0.4             | 3.3 (1.4-7.7)    | 0.01            |
| RS vs SS  | 1.1 (0.62-2.1)     | 0.4             | 1.7 (0.9-3.1)    | 0.1             |
| RR vs RS  | 0.6 (0.2-2.3)      | 0.3             | 1.9 (0.9-4.4)    | 0.1             |
| R vs S    | 1 (0.5-2.0)        | 0.6             | 1.8 (1.1-3.2)    | 0.04            |

337 SS: homozygote susceptible; RR: homozygote resistant; RS: heterozygote; \* significant difference  $p < 0.05$ .

338 ***CYP6P9a-R***: Among a total of 273 mosquitoes that were offered a blood meal 140  
 339 successfully fed (51.3%) whereas, 133 did not. Out of the 140 mosquitoes that blood-fed, 134  
 340 were successfully genotyped for *CYP6P9a-R* allele revealing that 23% (31/134), 50% (67/134)  
 341 and 27% (36/134) were homozygote resistant *CYP6P9a-RR*, heterozygotes *CYP6P9a-RS* and  
 342 homozygote susceptible *CYP6P9a-SS*, respectively (Figure 2b). Among the unfed mosquitoes,  
 343 11.3% (15/133) were homozygote resistant *CYP6P9a-RR*, 47.4% (63/133) heterozygotes and  
 344 41.3% (55/133) were homozygote susceptible *CYP6P9a-SS*. The estimation of odds ratio  
 345 showed that homozygote resistant *CYP6P9a-RR* mosquitoes are significantly more able to  
 346 blood feed than homozygote susceptible (OR = 3.33; CI 95%: 1.4 -7.7;  $p = 0.01$ ). No difference  
 347 was observed between heterozygote and homozygote resistant *CYP6P9a-RR* (OR= 1.9, 95%CI:  
 348 0.9-4.4;  $p = 0.1$ ) neither with homozygote susceptible *CYP6P9a-SS* (OR= 1.7, 95%CI: 0.9-3.1;

Formatted: Font: Bold

Formatted Table

Formatted: Indent: First line: 0.49"

349 p=0.1) mosquitoes (Table 2). Moreover, it was overall observed that mosquitoes with the  
350 *CYP6P9a*-R resistant allele have a greater chance to blood feed than those bearing the  
351 susceptible allele (OR = 1.9; CI 95%: 1.03-3.2;  $p=0.04$ ) (Table 2).

### 352 ~~Impact~~ **Association between of the *L119F-GSTe2* mutation ~~on~~ and** 353 **probing ~~and~~ blood feeding duration**

354 Out of the 120 mosquitoes that were individually filmed to assess the influence of  
355 insecticide resistance genes on the probing and feeding duration, 7 (6.14%), 40 (35.08%) and  
356 67 (58.77%) were genotyped as homozygous resistant 119F/F-RR, ~~heterozygotes~~ heterozygous  
357 L119F-RS and ~~homozygotes~~ homozygous susceptible L/L119, respectively. Overall, regardless  
358 of the genotype, the median value of mosquito's probing duration was 49.5 seconds (minimum  
359 = 4s and maximum = 290s). No difference was observed in the probing time of resistant  
360 mosquitoes 119F/F-RR (Median = 53 seconds) and heterozygotes L119F-RS (Median = 52s)  
361 compared to the homozygote susceptible L/L119 (Median = 52s).

362 Regarding the blood feeding duration, it was observed that the median and mean time  
363 for a mosquito to have a full blood meal was 249.5 seconds and  $303 \pm 181$  seconds respectively,  
364 with a minimum = 68 seconds and a maximum = 772 seconds. The feeding duration was longer  
365 (median=269s) in L/L119 mosquitoes compared to L119F-RS (229.5s) and 119F/F-RR (214s)  
366 but the difference was not statistically significant ( $p=0.19$ , Kruskal-Wallis test).

### 367 ~~Impact~~ **Effect of *L119F-GSTe2* and *CYP6P9a-R* mutations on the** 368 **blood meal size of *An. funestus***

369 ***L119F-GSTe2*** : From 457 individuals that took a full blood meal it was observed that  
370 the average weighted blood meal of a mosquito regardless of the *L119F-GSTe2* genotype was  
371  $3.4 \pm 1.3$   $\mu\text{l/mg}$  (minimum = 1.2  $\mu\text{l/mg}$ ; maximum = 9.2  $\mu\text{l/mg}$ ). However, the weighted blood

Formatted: Font: 16 pt

Formatted: Indent: First line: 0.49"

Formatted: Font: 16 pt

Formatted: Indent: First line: 0.49"

372 meal was not significantly different (P=0.17; Kruskal-Wallis test; Figure 3a) in homozygote  
373 susceptible L119-SS (3.0µl/mg) compared to homozygote resistant L119-RR (2.8µl/mg) and  
374 heterozygote L119F-RS (3.3µl/mg) mosquitoes. This result suggests that the *L119F-GSTe2*  
375 mutation ~~may is not affect~~associated with the volume of blood meal ingested by *An. funestus*.

376 ***CYP6P9a-R***: The influence of the *CYP6P9a-R* mutation on the volume of blood meal  
377 taken by *An. funestus*, was assessed using the 134 blood fed mosquitoes that were successfully  
378 genotyped for *CYP6P9a-R* allele. Overall, irrespective of the genotype, the mean weighted  
379 blood volume ingested by a mosquito was  $4.8 \pm 2$  µl/mg (minimum = 2 µl/mg; maximum =  
380 13.3µl/mg). However, the weighted blood meal volume of *CYP6P9a-SS* mosquitoes (Median  
381 = 3.71µl/mg) was lower than that of *CYP6P9a-RS* (Median = 4.73 µl/mg) and of *CYP6P9a-*  
382 *RR* (Median = 4.78 µl/mg) (Figure 3; p<0.004 for RS vs SS and p<0.006 for RR vs SS, Mann-  
383 Whitney test). No difference in the volume of the blood meal was observed between *CYP6P9a-*  
384 *RR* and *CYP6P9a-RS* mosquitoes (P=0.7; Mann-Whitney test). This result suggests that the  
385 over-expression of *CYP6P9a* gene is associated with an increase of the volume of the blood  
386 meal ingested by *An. funestus*.

387

### 388 **Expression profile of AAPP and D7 family salivary genes according** 389 **to *CYP6P9a-R* genotypes**

390 Due to the association observed between the *CYP6P9a-R* genotypes and blood feeding,  
391 an attempt was made to assess whether the genotypes of this gene could ~~impact~~be possible  
392 associated with the expression profile of key salivary genes. ~~Analysis of the~~The expression  
393 level of AAPP and 4 members of the D7 family salivary genes (D7r1, D7r2, D7r3 and D7r4)  
394 was analysed and compared between homozygous resistant (*CYP6P9a-RR*), heterozygous  
395 (*CYP6P9a-RS*) and homozygous susceptible genotype (*CYP6P9a-SS*) mosquitoes. No

Formatted: Font: 16 pt

Formatted: Indent: First line: 0.49"

396 ~~significant difference in the expression level of these genes was observed between the three~~  
397 ~~types of mosquitoes although D7 family genes appeared slightly over-expressed in CYP6P9a-~~  
398 ~~RR and CYP6P9a-RS when compared to CYP6P9a-SS did not show a significant difference in~~  
399 ~~expression in homozygote homozygous resistant (CYP6P9a RR) and heterozygote~~  
400 ~~heterozygous (CYP6P9a RS) mosquitoes when compared to homozygote homozygous~~  
401 ~~susceptible genotype (CYP6P9a SS) (Figure 4, Table 2) with average fold change for all these~~  
402 ~~genes lower than 1.5. This result suggests that CYP6P9a-R genotypes do not influence the~~  
403 ~~expression profile of both AAPP and D7 family genes in the salivary glands of *An. funestus*~~  
404 ~~mosquitoes.~~

405  
406

## 407 **Discussion.**

408 ~~Due to the absence of markers, the impact of metabolic resistance on life traits of~~  
409 ~~*Anopheles* mosquitoes has been poorly elucidated.~~ Recently, mutations in the *GST* epsilon 2  
410 and in the promoter region of the cytochrome P450 *CYP6P9a*, were described as robust  
411 molecular markers for tracking metabolic resistance in pyrethroids resistant populations of *An.*  
412 *funestus* [24,25]. Using these two key markers, this study assess the ~~impact~~ influence possible  
413 association of GST- and P450-based metabolic resistance to pyrethroids on the feeding process  
414 and blood meal volume of *An. funestus*.

415  
416  
417

Formatted: Font: 18 pt

Formatted: Indent: First line: 0.49"



418 ~~Impact~~ **Association of metabolic resistance on blood feeding success**

Formatted: Font: 16 pt, Not Italic

419 The present study revealed that *CYP6P9a* but not the *L119F-GSTe2* mutation could  
420 impact the blood feeding success of *An. funestus* mosquito as possessing the *CYP6P9a* resistant  
421 allele increased the likelihood of being successful in blood-feeding. Such selective advantage  
422 of *CYP6P9a* resistance allele was also previously reported in a semi-field study in experimental  
423 hut trial which observed that homozygous *CYP6P9a*-RR mosquitoes were significantly more  
424 likely to blood feed than susceptible SS [25]. This result suggests that *CYP6P9a* -mediated  
425 metabolic resistance might influence the ability of *An. funestus* mosquito to blood feed. In  
426 contrast, the absence of association observed here for the *L119F-GSTe2* mutation needed to be  
427 confirmed by further studies as the low sample of L119F-RR homozygous ~~uste~~ resistance  
428 mosquitoes might have biased our analysis. [This low number of L119F-RR mosquitoes could  
429 itself be linked to unsuccessfully genotyping of this marker in approximately 20% of samples  
430 analysed in this study. This important point highlights the need for further studies to improve  
431 the optimization of the protocol used in this study for the genotyping of the L119F-GSTe2  
432 mutation. Nevertheless](#) ~~On~~ [In the other hands](#), the mechanism whereby *CYP6P9a*-R resistant  
433 allele could ~~impact~~ [influence](#) mosquito feeding is unknown and was not investigated in the  
434 present study. One hypothesis to explain this association could be related to the motivation of  
435 mosquito to blood feed. In fact, it has been reported that some mosquito individuals that  
436 emerged with insufficient teneral reserves require an initial blood meal to compensate for  
437 insufficient teneral reserves rather than for egg development during their first gonotrophic cycle  
438 [34-36]. This phenomenon is mostly observed in smaller female mosquitoes that emerge with  
439 insufficient reserve [2]. Thus, we can presume that *CYP6P9a* resistant mosquitoes which were  
440 found significantly smaller than susceptible in the present study were more motivated to blood  
441 feed as they were probably the ones requiring more to compensate for their insufficient teneral  
442 reserves. [However, it's important to note that it was surprising and unusual to observed](#)

Formatted: Indent: First line: 0.49"

443 [CYP6Pa-SS mosquitoes bigger than CYP6Pa-RR ones since previous studies often reported](#)  
444 [larger mosquitoes tend to be more tolerant of insecticides, or that resistant phenotypes are](#)  
445 [associated with larger body sizes](#)[37,38] ~~(Osuwu et al. Sci Rep. 2017 Jun 16;7(1):3667-~~  
446 ~~Jeanrenaud et al. PLoS One. 2019 Apr 18;14(4):e0215552).~~ This unusual observation could be  
447 explained by the fact that, instead of using dead dried and unfed mosquito as usually done, in  
448 the present study the weight was estimated using alive fresh mosquitoes which were fed with  
449 sugar solution until 24 hours before being weighed. With this approach, mosquito's body  
450 weight may have been influenced by water and/or elements of sugar digestion that are  
451 eliminated when the mosquito is dried. This point highlights the need to perform further studies  
452 working for instance with dried mosquitoes before confirm our hypothesis about the association  
453 of teneral reserve and CYP6P9a mutation. One other approach could be to carry out calorimetric  
454 assays comparing teneral reserve between CYP6Pa-SS and CYP6Pa-RR mosquitoes. These  
455 further studies would certainly be more informative ~~investigating the impact of on the~~  
456 ~~influence of insecticide-metabolic~~ resistance on the motivation of *An. funestus* mosquito to  
457 blood feed ~~would probably help in confirming this hypothesis.~~

Formatted: Pattern: Clear

## 461 ~~Impact~~ **Influence** of metabolic resistance on probing time and feeding 462 **duration**

Formatted: Font: 16 pt, Not Italic

Formatted: Font: Not Italic

463 The influence of metabolic resistance on probing time and feeding duration was assessed  
464 in the present study only for *L119F-GSTe2* mutation. Results revealed no significant ~~impact~~  
465 ~~association~~ of this metabolic resistance gene on the time spent by a mosquito to probe. The

Formatted: Indent: First line: 0.49"

466 absence of ~~impact~~association of insecticide resistance on mosquito probing time was also  
467 reported for the *knock-down (kdr)* resistance gene in *Anopheles gambiae* with no difference in  
468 the probing time noticed between genotypes (RR, RS and SS) after exposure to untreated and  
469 insecticide-treated net [11]. This seems to indicate that insecticide resistance might not impact  
470 the probing duration of *Anopheles* mosquito during blood feeding. However, this hypothesis  
471 must be taken with caution as, to our knowledge, and the exception of the present study as well  
472 as the one of Diop *et al*, very little information is available on the impact of insecticide  
473 resistance on the probing time during mosquito blood-feeding. In the other hand, even if the  
474 difference was not statistically significant, mosquitoes possessing an *L119F-GSTe2* resistant  
475 allele (both homozygous and heterozygous) spent less time taking their blood meal than  
476 susceptible. This corroborate with observation previously made for *kdr* mutation in *An. gambiae*  
477 with lower feeding duration for homozygous resistant mosquitoes than heterozygote and  
478 homozygous susceptible [11]. The non-significant result observed may be due to the low  
479 number of resistant mosquitoes in the present study. However, from the results, it could be  
480 hypothesized that *L119F-GSTe2* mutation might confer an advantage to homozygous resistant  
481 mosquitoes as it was previously reported that rapid feeding reduces the risk to be killed by the  
482 host defensive behaviour [11,39].

483

484

### 485 **Impact-Effect of metabolic resistance on blood meal volume**

486 In ~~the present~~this study, we observed that the volume of blood ingested by a mosquito  
487 during a single blood feeding was associated with the genotype of the P450 *CYP6P9a* but not  
488 with the *L119F-GSTe2*-based metabolic resistance. This suggests that mechanisms involved in  
489 metabolic resistance to pyrethroids in *An. funestus* might influence mosquito life-traits

Formatted: Font: 16 pt, Not Italic

Formatted: Indent: First line: 0.49"

490 differently. However, as already discussed above, we cannot exclude that the absence of the  
491 influence observed for *L119F-GSTe2* gene might also be related to the low number of L119F-  
492 RR mosquitoes used in the present study. This latter hypothesis seems moreover reinforced by  
493 the results of previous studies showing *L119F-GSTe2* mutation [22] and *CYP6P9a*-R resistance  
494 gene [40]  ~~affecting-influencing~~  *An. funestus* fecundity in the same way. The positive association  
495 between *CYP6P9a*-R resistant allele and the volume of blood meal  ~~is in line with the work~~   
496  ~~of Okoye and collaborators reporting that pyrethroid resistance mechanism in southern African~~   
497  ~~*An. funestus* cause no reduction in fitness of this mosquito~~  ([41]  ~~Okoye et al 2007~~ ). Thus, our  
498  ~~finding suggests that the over-expression of CYP6P9a gene might probably not compromise~~   
499  ~~the volume of blood ingested of individual mosquitoes carrying the CYP6P9a-R resistant allele.~~   
500  ~~Given a bit surprising knowing~~  that activity of P450 monooxygenases as well as blood meal  
501 digestion, have been reported to generate an excess production of reactive oxygen species  
502 (ROS) increasing oxidative stress which could induce several damages in the mosquito's system  
503 that can result to death [42,43],  ~~it could have been expected to see~~  *CYP6P9a*-RR mosquitoes  
504  ~~taking lower blood to reduce negative effects of oxidative stress. This observation could~~   
505  ~~certainly be explained by the ability of~~  *Anopheles* mosquitoes to cope with oxidative damage  
506  ~~after blood feeding by increasing the~~   ~~activity~~  antioxidant activity enzymes including, Cu Zn  
507 and Mn superoxide dismutase (SOD), catalase, glutathione peroxides and thioredoxin reductase  
508 [44]  ~~(Graca Souza, A. V. et al. Adaptations against heme toxicity in blood feeding arthropods.~~   
509  ~~Insect Biochem Mol Biol 36, 322–335, https://doi.org/10.1016/j.ibmb.2006.01.009 (2006)). In~~   
510  ~~fact, because the CYP6P9a-R resistant allele was recently reported to be negatively associated~~   
511  ~~with the fecundity of An. funestus [40], we were expecting to see CYP6P9a resistant mosquitoes~~   
512  ~~taking lower blood meal than susceptible to reduce negative effects of oxidative stress. This~~   
513 suggests that association between the *CYP6P9a*-R resistant allele and mosquito's blood meal  
514 size could be an indirect consequence of some other physiological activities. For instance,

Formatted: Font: Italic

Formatted: Font: Not Italic

Formatted: Font: Italic

Field Code Changed

515 because *CYP6P9a* resistant mosquitoes were significantly smaller than their susceptible  
516 counterparts, and noting that it has been demonstrated that the amount of teneral reserves is  
517 proportional to the body size of mosquito [2], we can presume that the high blood meal volume  
518 ingested by *CYP6P9a*-RR mosquitoes might be as a result of a need to compensate for the  
519 limited teneral reserves post emergence. In this case, the association observed here could be an  
520 indirect consequence of the negative impact-association of *CYP6P9a*-R resistant allele recently  
521 observed on the larval development of *An. funestus* [40] resulting to a small body size, and by  
522 consequence to insufficient teneral reserves for resistant mosquitoes. Indeed, it was  
523 demonstrated that encountering a nutritional environment by *Anopheles* larvae strongly  
524 influences adult fitness-related traits such as body size and teneral metabolic reserves [2,31,45].  
525 However, our finding did not corroborate with the positive association previously reported  
526 between the volume of ingested blood meal and mosquito body size [2]. Further studies will  
527 help elucidate the underlying reason of this correlation between *CYP6P9a* genotypes and blood  
528 meal size.

529 **Influence, Possible association of *CYP6P9a*-R resistant allele on**  
530 **salivary gland genes expression**

531 To obtain a successful blood meal, a female mosquito must balance the risk of death  
532 caused by host defensive behavior against the benefits to feed on a host species that maximize  
533 fertility [46]. Salivary components permit mosquitoes to reduce their engorgement time and  
534 increase their likelihood of survival [5]. In the present study, we assessed the level of expression  
535 of genes encoding for some salivary proteins known to be involved on blood intake process of  
536 mosquitoes such as, AAPP and members of D7 family proteins [6,47,48]. The comparative  
537 analysis of the expression level of these genes between *CYP6P9a* genotypes showed no  
538 significant difference between mosquitoes bearing the resistant allele and those with the

Formatted: Font: 16 pt, Not Italic

Formatted: Font: 16 pt

Formatted: Font: 16 pt

Formatted: Font: 16 pt, Not Italic

Formatted: Indent: First line: 0.49"

539 susceptible one. This result suggests that the expression of AAPP and D7 family salivary genes  
540 are not associated to the *CYP6P9a* mutation. This observation is intriguing as some salivary  
541 genes such as D7 family genes were previously reported to be over-expressed in resistant *An.*  
542 *funestus* mosquito compared to susceptible strain [24,49-52]. The lack of significance observed  
543 with the differential expression of genes in the present study could be explained by the fact that,  
544 our analyses in this study were performed on mosquitoes obtained after ~~reciprocal~~ crosses  
545 between two different strains and therefore sharing the same background, while other studies  
546 compared insecticide resistant field ~~/laboratory~~ mosquitoes and susceptible laboratory strains  
547 ~~with different genetic background~~ [24,49,53]. The absence of influence of the *CYP6P9a* gene  
548 on the expression level of salivary gland genes involved in the blood feeding process observed  
549 in the present study appears to indicate that the association found between this gene and the  
550 size of blood meal taken by *An. funestus* mosquito might not be related to the expression of  
551 these salivary genes encoding proteins which mediate the blood meal process.

552 This study revealed that GSTe2-mediated resistance ~~does is~~ not ~~affect-associated with~~  
553 the blood meal intake of *An. funestus* mosquitoes, whereas *CYP6P9a*-based resistance to  
554 pyrethroids is associated with a feeding success and a higher blood meal size. However, this  
555 influence on *Anopheles funestus* blood meal intake is not associated with differential expression  
556 of major salivary gland proteins involved in blood-feeding. Given the rapid growth of  
557 insecticide resistance, it would be interesting to study how this association could ~~impact-affect~~  
558 the fecundity and the vectorial capacity of *An. funestus* mosquitoes.

559 **Author Contributions:** E.E.N and C.S.W conceived the study; EEN, L.N, C.N SK and  
560 C.S.W designed the study; E.E.N, .L.N, A.B, T.A and M.T carried out the sample  
561 collection; L.N, A.B, and T.A reared and maintained the strain in the insectary; E.E.N, L.N  
562 A.B, and T.A performed blood feeding experiments. L.N, T.A and M.T performed the  
563 molecular analyses; E.E.N, L.N, A.B, M.T and C.N analyzed the data; E.E.N, L.N and

564 C.S.W wrote the manuscript. M.T C.N and S.K reviewed the manuscript. All authors  
565 approved the manuscript.

### 566 **Ethical approval and consent to participate**

567 Ethical clearance was obtained from the National Ethics Committee of Cameroon's Ministry of  
568 Public Health (N°2018/04/1000/CE/CNERSH/SP) in conformity to the WMA Declaration of  
569 Helsinki. Informed verbal consent was obtained from household owners for using their houses  
570 for mosquito collection.

571 **Acknowledgments:** We thank Dr Micheal KUSIMO and Mr Francis NKEMNGO; native  
572 speakers of English language for accepting to review and edit this paper.

573 ~~**Funding:** This study was funded by a Wellcome Trust Training fellowship  
574 (109930/Z/15/Z) awarded to ELANGA N'DILLE Emmanuel.~~

575 **Conflicts of Interest:** The authors declare no conflicts of interests.

576

577

578

579

580

## 581 **References**

- 582 1. WHO (2019) World Malaria Report 2019, Geneva: World Health Organization; 2019.  
583 Licence: CC BY-NC-SA 3.0 IGO.
- 584 2. Briegel H (1990) Fecundity, metabolism, and body size in *Anopheles* (Diptera: Culicidae),  
585 vectors of malaria. Journal of medical entomology 27: 839-850.

Formatted: Font: 18 pt

Formatted: Font: (Default) Times New Roman, 12 pt

Formatted: Line spacing: 1.5 lines

Field Code Changed

Formatted: Font: (Default) Times New Roman, 12 pt, Italic

Formatted: Font: (Default) Times New Roman, 12 pt

- 586 3. Hurd H (2003) Manipulation of medically important insect vectors by their parasites. Annual  
587 review of entomology 48: 141-161.
- 588 4. Roitberg BD, Gordon I (2005) Does the *Anopheles* blood meal-fecundity curve, curve?  
589 Journal of Vector Ecology 30: 83.
- 590 5. Ribeiro J (2000) Blood- feeding in mosquitoes: probing time and salivary gland anti-  
591 haemostatic activities in representatives of three genera (*Aedes*, *Anopheles*, *Culex*).  
592 Medical and veterinary entomology 14: 142-148.
- 593 6. Islam A, Emran TB, Yamamoto DS, Iyori M, Amelia F, et al. (2019) Anopheline antiplatelet  
594 protein from mosquito saliva regulates blood feeding behavior. Scientific reports 9:  
595 3129.
- 596 7. Thiévent K, Hauser G, Elaian O, Koella JC (2019) The interaction between permethrin  
597 exposure and malaria infection affects the host-seeking behaviour of mosquitoes.  
598 Malaria journal 18: 79.
- 599 8. Taylor P, Hurd H (2001) The influence of host haematocrit on the blood feeding success of  
600 *Anopheles stephensi*; implications for enhanced malaria transmission. Parasitology 122:  
601 491-496.
- 602 9. Edman JD, Lynn HC (1975) Relationship between blood meal volume and ovarian  
603 development in *Culex nigripalpus* (Diptera: *Culicidae*). Entomologia experimentalis et  
604 applicata 18: 492-496.
- 605 10. Lehane MJ (2005) The biology of blood-sucking in insects: Cambridge University Press.
- 606 11. Diop MM, Chandre F, Rossignol M, Porciani A, Chateau M, et al. (2019) Sub-lethal  
607 insecticide exposure affects host biting efficiency of Kdr-resistant *Anopheles gambiae*.  
608 bioRxiv: 653980.
- 609 12. Bhatt S, Weiss D, Cameron E, Bisanzio D, Mappin B, et al. (2015) The effect of malaria  
610 control on *Plasmodium falciparum* in Africa between 2000 and 2015. Nature 526: 207.
- 611 13. Ranson H, N'guessan R, Lines J, Moiroux N, Nkuni Z, et al. (2011) Pyrethroid resistance  
612 in African anopheline mosquitoes: what are the implications for malaria control? Trends  
613 in parasitology 27: 91-98.
- 614 14. Strode C, Donegan S, Garner P, Enayati AA, Hemingway J (2014) The impact of pyrethroid  
615 resistance on the efficacy of insecticide-treated bed nets against African anopheline  
616 mosquitoes: systematic review and meta-analysis. PLoS medicine 11.
- 617 15. Martinez- Torres D, Chandre F, Williamson M, Darriet F, Berge JB, et al. (1998) Molecular  
618 characterization of pyrethroid knockdown resistance (kdr) in the major malaria vector  
619 *Anopheles gambiae* ss. Insect molecular biology 7: 179-184.

Formatted: Font: (Default) Times New Roman, 12 pt, Italic

Formatted: Font: (Default) Times New Roman, 12 pt

Formatted: Font: (Default) Times New Roman, 12 pt, Italic

Formatted: Font: (Default) Times New Roman, 12 pt

Formatted: Font: (Default) Times New Roman, 12 pt, Italic

Formatted: Font: (Default) Times New Roman, 12 pt

Formatted: Font: (Default) Times New Roman, 12 pt, Italic

Formatted: Font: (Default) Times New Roman, 12 pt

Formatted: Font: (Default) Times New Roman, 12 pt, Italic

Formatted: Font: (Default) Times New Roman, 12 pt

Formatted: Font: (Default) Times New Roman, 12 pt, French (France)

Formatted: Font: (Default) Times New Roman, 12 pt

Formatted: Font: (Default) Times New Roman, 12 pt, Italic

Formatted: Font: (Default) Times New Roman, 12 pt

Formatted: Font: (Default) Times New Roman, 12 pt, Italic

Formatted: Font: (Default) Times New Roman, 12 pt

Formatted: Font: (Default) Times New Roman, 12 pt, French (France)

Formatted: Font: (Default) Times New Roman, 12 pt

Formatted: Font: (Default) Times New Roman, 12 pt, Italic

Formatted: Font: (Default) Times New Roman, 12 pt



- 620 16. Ranson H, Jensen B, Vulule J, Wang X, Hemingway J, et al. (2000) Identification of a point  
621 mutation in the voltage- gated sodium channel gene of Kenyan *Anopheles gambiae*  
622 associated with resistance to DDT and pyrethroids. *Insect molecular biology* 9: 491-  
623 497.
- 624 17. Berticat C, Boquien G, Raymond M, Chevillon C (2002) Insecticide resistance genes induce  
625 a mating competition cost in *Culex pipiens mosquitoes*. *Genetics Research* 79: 41-47.
- 626 18. Saingamsook J, Yanola J, Lumjuan N, Walton C, Somboon P (2019) Investigation of  
627 Relative Development and Reproductivity Fitness Cost in Three Insecticide-Resistant  
628 Strains of *Aedes aegypti* from Thailand. *Insects* 10: 265.
- 629 19. Rowland M (1991) Behaviour and fitness of  $\gamma$ HCH/dieldrin resistant and susceptible female  
630 *Anopheles gambiae* and *An. stephensi mosquitoes* in the absence of insecticide. *Medical*  
631 *and Veterinary Entomology* 5: 193-206.
- 632 20. Kumar K, Sharma AK, Kumar S, Patel S, Sarkar M, et al. (2011) Multiple insecticide  
633 resistance/susceptibility status of *Culex quinquefasciatus*, principal vector of  
634 bancroftian filariasis from filaria endemic areas of northern India. *Asian Pacific journal*  
635 *of tropical medicine* 4: 426-429.
- 636 21. Martins AJ, Bellinato DF, Peixoto AA, Valle D, Lima JBP (2012) Effect of insecticide  
637 resistance on development, longevity and reproduction of field or laboratory selected  
638 *Aedes aegypti* populations. *PloS one* 7: e31889.
- 639 22. Tchouakui M, Riveron JM, Djonabaye D, Tchapgá W, Irving H, et al. (2018) Fitness Costs  
640 of the Glutathione S-Transferase Epsilon 2 (L119F-GSTe2) Mediated Metabolic  
641 Resistance to Insecticides in the Major African Malaria Vector, *Anopheles Funestus*.  
642 *Genes* 9: 645.
- 643 23. Tchouakui M, Fossog BT, Ngannang BV, Djonabaye D, Tchapgá W, et al. (2019)  
644 Investigation of the influence of a glutathione S-transferase metabolic resistance to  
645 pyrethroids/DDT on mating competitiveness in males of the African malaria vector,  
646 *Anopheles funestus*. *Wellcome open research* 4.
- 647 24. Riveron JM, Yunta C, Ibrahim SS, Djouaka R, Irving H, et al. (2014) A single mutation in  
648 the GSTe2 gene allows tracking of metabolically based insecticide resistance in a major  
649 malaria vector. *Genome biology* 15: R27.
- 650 25. Weedall GD, Mugenzi LM, Menze BD, Tchouakui M, Ibrahim SS, et al. (2019) A  
651 cytochrome P450 allele confers pyrethroid resistance on a major African malaria vector,  
652 reducing insecticide-treated bednet efficacy. *Science translational medicine* 11:  
653 eaat7386.

Formatted: Font: (Default) Times New Roman, 12 pt, Italic

Formatted: Font: (Default) Times New Roman, 12 pt

Formatted: Font: (Default) Times New Roman, 12 pt, Italic

Formatted: Font: (Default) Times New Roman, 12 pt

Formatted: Font: (Default) Times New Roman, 12 pt, Italic

Formatted: Font: (Default) Times New Roman, 12 pt

Formatted: Font: (Default) Times New Roman, 12 pt, Italic

Formatted: Font: (Default) Times New Roman, 12 pt

Formatted: Font: (Default) Times New Roman, 12 pt, Italic

Formatted: Font: (Default) Times New Roman, 12 pt

Formatted: Font: (Default) Times New Roman, 12 pt, Italic

Formatted: Font: (Default) Times New Roman, 12 pt

Formatted: Font: (Default) Times New Roman, 12 pt, Italic

Formatted: Font: (Default) Times New Roman, 12 pt

Formatted: Font: (Default) Times New Roman, 12 pt, Italic

Formatted: Font: (Default) Times New Roman, 12 pt

Formatted: Font: (Default) Times New Roman, 12 pt, Italic

Formatted: Font: (Default) Times New Roman, 12 pt

- 654 26. Menze BD, Riveron JM, Ibrahim SS, Irving H, Antonio-Nkondjio C, et al. (2016) Multiple  
655 insecticide resistance in the malaria vector *Anopheles funestus* from Northern Cameroon  
656 is mediated by metabolic resistance alongside potential target site insensitivity  
657 mutations. PloS one 11: e0163261.
- 658 27. Morgan JC, Irving H, Okedi LM, Steven A, Wondji CS (2010) Pyrethroid resistance in an  
659 *Anopheles funestus* population from Uganda. PLoS One 5: e11872.
- 660 28. Hunt R, Brooke B, Pillay C, Koekemoer L, Coetzee M (2005) Laboratory selection for and  
661 characteristics of pyrethroid resistance in the malaria vector *Anopheles funestus*.  
662 Medical and veterinary entomology 19: 271-275.
- 663 29. Riveron JM, Irving H, Ndula M, Barnes KG, Ibrahim SS, et al. (2013) Directionally selected  
664 cytochrome P450 alleles are driving the spread of pyrethroid resistance in the major  
665 malaria vector *Anopheles funestus*. Proceedings of the National Academy of Sciences  
666 110: 252-257.
- 667 30. Wondji CS, Irving H, Morgan J, Lobo NF, Collins FH, et al. (2009) Two duplicated P450  
668 genes are associated with pyrethroid resistance in *Anopheles funestus*, a major malaria  
669 vector. Genome research 19: 452-459.
- 670 31. Briegel H, Lea AO, Klowden MJ (1979) Hemoglobinometry as a method for measuring  
671 blood meal sizes of mosquitoes (Diptera: Culicidae). Journal of Medical Entomology  
672 15: 235-238.
- 673 32. Livak KJ (1984) Organization and mapping of a sequence on the Drosophila melanogaster  
674 X and Y chromosomes that is transcribed during spermatogenesis. Genetics 107: 611-  
675 634.
- 676 33. Koekemoer L, Kamau L, Hunt R, Coetzee M (2002) A cocktail polymerase chain reaction  
677 assay to identify members of the *Anopheles funestus* (Diptera: Culicidae) group. The  
678 American journal of tropical medicine and hygiene 66: 804-811.
- 679 34. Klowden MJ, Lea AO (1978) Blood meal size as a factor affecting continued host-seeking  
680 by *Aedes aegypti* (L.). The American journal of tropical medicine and hygiene 27: 827-  
681 831.
- 682 35. Ramasamy M, Srikrishnaraj K, Hadjirin N, Perera S, Ramasamy R (2000) Physiological  
683 aspects of multiple blood feeding in the malaria vector *Anopheles tessellatus*. Journal of  
684 insect physiology 46: 1051-1059.
- 685 36. Takken W, van Loon JJ, Adam W (2001) Inhibition of host-seeking response and olfactory  
686 responsiveness in *Anopheles gambiae* following blood feeding. Journal of insect  
687 physiology 47: 303-310.

Formatted: Font: (Default) Times New Roman, 12 pt, Italic

Formatted: Font: (Default) Times New Roman, 12 pt

Formatted: Font: (Default) Times New Roman, 12 pt, Italic

Formatted: Font: (Default) Times New Roman, 12 pt

Formatted: Font: (Default) Times New Roman, 12 pt, Italic

Formatted: Font: (Default) Times New Roman, 12 pt

Formatted: Font: (Default) Times New Roman, 12 pt, Italic

Formatted: Font: (Default) Times New Roman, 12 pt

Formatted: Font: (Default) Times New Roman, 12 pt, Italic

Formatted: Font: (Default) Times New Roman, 12 pt

Formatted: Font: (Default) Times New Roman, 12 pt, Italic

Formatted: Font: (Default) Times New Roman, 12 pt

Formatted: Font: (Default) Times New Roman, 12 pt, Italic

Formatted: Font: (Default) Times New Roman, 12 pt

Formatted: Font: (Default) Times New Roman, 12 pt, Italic

Formatted: Font: (Default) Times New Roman, 12 pt

Formatted: Font: (Default) Times New Roman, 12 pt, Italic

Formatted: Font: (Default) Times New Roman, 12 pt

Formatted: Font: (Default) Times New Roman, 12 pt, Italic

Formatted: Font: (Default) Times New Roman, 12 pt

- 688 37. Jeanrenaud AC, Brooke BD, Oliver SV (2019) The effects of larval organic fertiliser  
689 exposure on the larval development, adult longevity and insecticide tolerance of  
690 zoophilic members of the *Anopheles gambiae* complex (Diptera: *Culicidae*). PLoS one  
691 14.
- 692 38. Owusu HF, Chitnis N, Müller P (2017) Insecticide susceptibility of *Anopheles* mosquitoes  
693 changes in response to variations in the larval environment. Scientific reports 7: 1-9.
- 694 39. Lyimo IN, Haydon DT, Mbina KF, Daraja AA, Mbehela EM, et al. (2012) The fitness of  
695 African malaria vectors in the presence and limitation of host behaviour. Malaria journal  
696 11: 425.
- 697 40. Tchouakui M, Jacob Riveron M, Mugenzi LMJ, Djonabaye D, Wondji MJ, et al. (2020)  
698 Cytochrome P450 metabolic resistance (CYP6P9a) to pyrethroids imposes a fitness cost  
699 in the major African malaria vector *Anopheles funestus*. Genetics Society.
- 700 41. Okoye P, Brooke B, Hunt R, Coetzee M (2007) Relative developmental and reproductive  
701 fitness associated with pyrethroid resistance in the major southern African malaria  
702 vector, *Anopheles funestus*. Bulletin of Entomological Research 97: 599-605.
- 703 42. Rivero A, Vézilier J, Weill M, Read AF, Gandon S (2010) Insecticide Control of Vector-  
704 Borne Diseases: When Is Insecticide Resistance a Problem? PLoS Pathog 6.
- 705 43. Saeaeu L, Phumala Morales N, Komalamisra N, Vargas RM (2011) Antioxidative systems  
706 defense against oxidative stress induced by blood meal in *Aedes aegypti*. Southeast  
707 Asian Journal of Tropical Medicine and Public Health 42: 542.
- 708 44. Graça-Souza AV, Maya-Monteiro C, Paiva-Silva GO, Braz GR, Paes MC, et al. (2006)  
709 Adaptations against heme toxicity in blood-feeding arthropods. Insect biochemistry and  
710 molecular biology 36: 322-335.
- 711 45. Telang A, Wells MA (2004) The effect of larval and adult nutrition on successful  
712 autogenous egg production by a mosquito. Journal of Insect Physiology 50: 677-685.
- 713 46. Edman JD, Scott TW (1987) Host defensive behaviour and the feeding success of  
714 mosquitoes. International Journal of Tropical Insect Science 8: 617-622.
- 715 47. Calvo E, Dao A, Pham VM, Ribeiro JMC (2007) An insight into the sialome of *Anopheles*  
716 *funestus* reveals an emerging pattern in anopheline salivary protein families. Insect  
717 Biochem Mol Biol 37: 164-175.
- 718 48. Calvo E, Mans BJ, Andersen JF, Ribeiro JM (2006) Function and evolution of a mosquito  
719 salivary protein family. J Biol Chem 281.
- 720 49. Elanga-Ndille E, Nouage L, Binyang A, Assatse T, Tene-Fossog B, et al. (2019)  
721 Overexpression of two members of D7 salivary genes family is associated with

Formatted: Font: (Default) Times New Roman, 12 pt, Italic

Formatted: Font: (Default) Times New Roman, 12 pt

Formatted: Font: (Default) Times New Roman, 12 pt, Italic

Formatted: Font: (Default) Times New Roman, 12 pt

Formatted: Font: (Default) Times New Roman, 12 pt, Italic

Formatted: Font: (Default) Times New Roman, 12 pt

Formatted: Font: (Default) Times New Roman, 12 pt, Italic

Formatted: Font: (Default) Times New Roman, 12 pt

Formatted: Font: (Default) Times New Roman, 12 pt, Italic

Formatted: Font: (Default) Times New Roman, 12 pt

Formatted: Font: (Default) Times New Roman, 12 pt, Italic

Formatted: Font: (Default) Times New Roman, 12 pt

Formatted: Font: (Default) Times New Roman, 12 pt, Italic

Formatted: Font: (Default) Times New Roman, 12 pt

Formatted: Font: (Default) Times New Roman, 12 pt, Italic

Formatted: Font: (Default) Times New Roman, 12 pt

Formatted: Font: (Default) Times New Roman, 12 pt, French (France)

Formatted: Font: (Default) Times New Roman, 12 pt

722 pyrethroid resistance in the malaria vector *Anopheles funestus* ~~ss~~ but not in *Anopheles*  
723 *gambiae* in Cameroon. *Genes* 10: 211.

724 50. Riveron JM, Ibrahim SS, Chanda E, Mzilahowa T, Cuamba N, et al. (2014) The highly  
725 polymorphic CYP6M7 cytochrome P450 gene partners with the directionally selected  
726 CYP6P9a and CYP6P9b genes to expand the pyrethroid resistance front in the malaria  
727 vector *Anopheles funestus* in Africa. *BMC genomics* 15: 817.

728 51. Samb B, Konate L, Irving H, Riveron JM, Dia I, et al. (2016) Investigating molecular basis  
729 of lambda-cyhalothrin resistance in an *Anopheles funestus* population from Senegal.  
730 *Parasites & vectors* 9: 449.

731 52. Wilding C, Weetman D, Rippon E, Steen K, Maweje H, et al. (2015) Parallel evolution or  
732 purifying selection, not introgression, explains similarity in the pyrethroid  
733 detoxification linked GSTE4 of *Anopheles gambiae* and *An. arabiensis*. *Molecular*  
734 *genetics and genomics* 290: 201-215.

735 53. Wilding CS, Weetman D, Rippon E, Steen K, Maweje H, et al. (2015) Parallel evolution  
736 or purifying selection, not introgression, explains similarity in the pyrethroid  
737 detoxification linked GSTE4 of *Anopheles gambiae* and *An. arabiensis*. *Molecular*  
738 *genetics and genomics* 290: 201-215.

739  
740  
741

742  
743  
744

745  
746  
747

## 745 **Figures legend**titles

746 **Figure 1:** Effect of metabolic resistance on *An. funestus* mosquito weight. Distribution of  
747 genotypes of *L119F-GSTe2* (A) and *CYP6P9a-R* (B) markers according to the weight. ~~*An.*~~  
748 ~~*funestus* mosquito weight~~.

Formatted: Font: (Default) Times New Roman, 12 pt, Italic

Formatted: Font: (Default) Times New Roman, 12 pt

Formatted: Font: (Default) Times New Roman, 12 pt, Italic

Formatted: Font: (Default) Times New Roman, 12 pt

Formatted: Font: (Default) Times New Roman, 12 pt, French (France)

Formatted: Font: (Default) Times New Roman, 12 pt

Formatted: Font: (Default) Times New Roman, 12 pt, Italic

Formatted: Font: (Default) Times New Roman, 12 pt

Formatted: Font: (Default) Times New Roman, 12 pt, Italic

Formatted: Font: (Default) Times New Roman, 12 pt

Formatted: Font: (Default) Times New Roman, 12 pt, Italic

Formatted: Font: (Default) Times New Roman, 12 pt

Formatted: Font: (Default) Times New Roman, 12 pt, Italic

Formatted: Font: (Default) Times New Roman, 12 pt

Formatted: Font: (Default) Times New Roman, 12 pt, Italic

Formatted: Font: (Default) Times New Roman, 12 pt

Formatted: Font: (Default) Times New Roman, 12 pt, Italic

Formatted: Font: (Default) Times New Roman, 12 pt

Formatted: Font: 12 pt

Formatted: Font: Bold

Formatted: Font: Not Bold

Formatted: Font: Not Bold

749 **Figure 2: 2. Association between resistance markers and bloodfeeding.** Distribution of  
750 *L119F-GSTe2* (A) and *CYP6P9a-R* (B) genotypes between blood-fed and unfed *An. funestus*  
751 mosquitoes.

752 **Figure 3: 3. Influence of metabolic resistance on blood meal size of *An. funestus***  
753 **mosquitoes.** Blood-meal-sizeEffect of *L119F-GSTe2*(A) and *CYP6P9a-R* (B).*An. funestus*  
754 mosquitoes according to their *L119F-GSTe2* (A) and *CYP6P9a-R* (B) genotypes.

755 **Figure 4:4. Comparative expression of salivary genes between *CYP6P9a* genotypes.**  
756 Expression level of AAPP and some members of D7 family genes in *CYP6P9a-RR* and  
757 *CYP6P9a-RS* mosquitoes in comparison with *CYP6P9a* susceptible mosquitoes. [The](#)  
758 [normalized relative expression of each gene against two housekeeping genes \(RSP7 and Actin\)](#)  
759 [is represented on the vertical axis. Letters a, b, c, d, e indicates the absence of significant](#)  
760 [difference in the expression level of each gene between the three types of mosquitoes. The](#)  
761 [dotted line indicates genes expression level in \*CYP6P9a\* susceptible mosquitoes used as](#)  
762 [standard.](#)

763

764

765

766

767

768

769

Formatted: Font: Bold

Formatted: Font: Bold

Formatted: Font: Bold

770

771
